# Supplementary material for: <em>Ixodes scapularis</em> Calreticulin Binds Complement Proteins but Does Not Protect <em>Borrelia burgdorferi </em>from Complement Killing
Source: Preprints.org preprint supplement (doi:10.20944/preprints202404.1648.v1), 2024-04-25
Supplement: Supplementary file 1 [file supplementary]

## Sheet: Table 2(Fraction 6)
Protein present only in NHS + CRT
Accession	Description	Coverage [%]	# Peptides	# PSMs	# Unique Peptides	Score Sequest HT: Sequest HT	Abundance Ratio: (NC) / (N)	Abundance Ratio (log2): (NC) / (N)	Abundance Ratio Adj. P-Value: (NC) / (N)	Abundance Ratio Variability [%]: (NC) / (N)	Abundances (Grouped): N	Abundances (Grouped): NC	Abundance: F13: Control, N	Abundance: F14: Control, N	Abundance: F15: Control, N	Abundance: F4: Sample, NC	Abundance: F5: Sample, NC	Abundance: F6: Sample, NC
Q96M02	(E2-independent) E3 ubiquitin-conjugating enzyme FATS OS=Homo sapiens OX=9606 GN=C10orf90 PE=2 SV=2	6	2	2	2	4.85	100	6.64	4.1949e-17			96448				54143.1		140131
Q7RTP6	[F-actin]-monooxygenase MICAL3 OS=Homo sapiens OX=9606 GN=MICAL3 PE=1 SV=2	2	2	2	2	4.13	100	6.64	4.1949e-17			56460.9				43633.8	35822.3	76442.5
M0R147	17-beta-hydroxysteroid dehydrogenase 14 (Fragment) OS=Homo sapiens OX=9606 GN=HSD17B14 PE=1 SV=1	30	1	1	1	2.82	100	6.64	4.1949e-17			461953					293092
H0Y8X4	2'-deoxynucleoside 5'-phosphate N-hydrolase 1 (Fragment) OS=Homo sapiens OX=9606 GN=DNPH1 PE=1 SV=1	11	1	1	1	2.72	100	6.64	4.1949e-17			1.82338e+06				1.4872e+06
S4R408	Acetylcholinesterase collagenic tail peptide (Fragment) OS=Homo sapiens OX=9606 GN=COLQ PE=4 SV=1	11	1	1	1	2.28	100	6.64	4.1949e-17			314744						314744
Q6NUN0	Acyl-coenzyme A synthetase ACSM5, mitochondrial OS=Homo sapiens OX=9606 GN=ACSM5 PE=1 SV=2	3	1	1	1	2.13	100	6.64	4.1949e-17			1.04651e+06				853563
Q9NX46	ADP-ribose glycohydrolase ARH3 OS=Homo sapiens OX=9606 GN=ADPRS PE=1 SV=1	10	2	2	2	4.19	100	6.64	4.1949e-17			420591					116105	966661
Q5STX8	Allograft inflammatory factor 1 (Fragment) OS=Homo sapiens OX=9606 GN=AIF1 PE=1 SV=1	6	1	1	1	1.56	100	6.64	4.1949e-17			1.06087e+06					673083
H7C605	Allograft inflammatory factor 1-like OS=Homo sapiens OX=9606 GN=AIF1L PE=4 SV=1	29	1	2	1	3.25	100	6.64	4.1949e-17			851851					544950	844843
D3DNG8	Angiotensin II receptor, type 1, isoform CRA_a OS=Homo sapiens OX=9606 GN=AGTR1 PE=1 SV=1	6	1	1	1	2.93	100	6.64	4.1949e-17			518490				421510		520194
F6X3S4	Angiotensin-converting enzyme OS=Homo sapiens OX=9606 PE=3 SV=2	1	1	1	1	1.78	100	6.64	4.1949e-17			365594					231956
Q6UB99	Ankyrin repeat domain-containing protein 11 OS=Homo sapiens OX=9606 GN=ANKRD11 PE=1 SV=3	2	2	3	2	8.3	100	6.64	4.1949e-17			919158					508082	1.055e+06
A0A7P0Z4A8	Anthrax toxin receptor 2 OS=Homo sapiens OX=9606 GN=ANTXR2 PE=4 SV=1	3	1	1	1	2.1	100	6.64	4.1949e-17			265892				262588	139326
Q96J65	ATP-binding cassette sub-family C member 12 OS=Homo sapiens OX=9606 GN=ABCC12 PE=1 SV=2	4	2	2	2	5.17	100	6.64	4.1949e-17			48564				28111.1	31607	48564
M0R0L2	Atypical kinase COQ8B, mitochondrial OS=Homo sapiens OX=9606 GN=COQ8B PE=1 SV=2	5	1	2	1	6.18	100	6.64	4.1949e-17			742404					471027
A0A494C142	BRCA1-associated RING domain protein 1 (Fragment) OS=Homo sapiens OX=9606 GN=BARD1 PE=1 SV=1	4	1	1	1	2.84	100	6.64	4.1949e-17			171264				151089		158342
F5GWA4	BTB/POZ domain-containing adapter for CUL3-mediated RhoA degradation protein 3 OS=Homo sapiens OX=9606 GN=KCTD10 PE=1 SV=1	9	1	4	1	8.36	100	6.64	4.1949e-17			9.70832e+06				7.9184e+06
Q32M84	BTB/POZ domain-containing protein 16 OS=Homo sapiens OX=9606 GN=BTBD16 PE=1 SV=2	5	2	2	2	3.94	100	6.64	4.1949e-17			501910				409373	353755	302121
Q8N5S9	Calcium/calmodulin-dependent protein kinase kinase 1 OS=Homo sapiens OX=9606 GN=CAMKK1 PE=1 SV=2	3	1	1	1	2.74	100	6.64	4.1949e-17			335890				232386	213109	614887
H7BZC6	Calcium/calmodulin-dependent protein kinase type II subunit beta (Fragment) OS=Homo sapiens OX=9606 GN=CAMK2B PE=1 SV=1	17	1	1	1	2.61	100	6.64	4.1949e-17			214424				110455		339511
A0A7P0TAE9	Calnexin OS=Homo sapiens OX=9606 GN=CANX PE=4 SV=1	3	1	1	1	2.87	100	6.64	4.1949e-17			1.12522e+06				807839	967490	1.12522e+06
C9JI74	cAMP-regulated phosphoprotein 21 (Fragment) OS=Homo sapiens OX=9606 GN=ARPP21 PE=1 SV=1	35	1	1	1	2.54	100	6.64	4.1949e-17			462328				349280		499136
A0A0A0MTT5	Cancer/testis antigen 1 OS=Homo sapiens OX=9606 GN=CTAG1A PE=1 SV=1	12	1	1	1	3.08	100	6.64	4.1949e-17			669152				545781
Q96IY4	Carboxypeptidase B2 OS=Homo sapiens OX=9606 GN=CPB2 PE=1 SV=2	3	1	1	1	3.45	100	6.64	4.1949e-17			219473						219473
P22792	Carboxypeptidase N subunit 2 OS=Homo sapiens OX=9606 GN=CPN2 PE=1 SV=3	9	2	5	2	16.13	100	6.64	4.1949e-17			193416				157756	122257	296887
Q9NQ79	Cartilage acidic protein 1 OS=Homo sapiens OX=9606 GN=CRTAC1 PE=1 SV=2	7	3	4	3	7.73	100	6.64	4.1949e-17			144955				107968		158730
Q4KMG0	Cell adhesion molecule-related/down-regulated by oncogenes OS=Homo sapiens OX=9606 GN=CDON PE=1 SV=2	2	1	1	1	3.1	100	6.64	4.1949e-17			823790				772030	454881
H0YFJ7	Cell division cycle and apoptosis regulator protein 1 (Fragment) OS=Homo sapiens OX=9606 GN=CCAR1 PE=1 SV=1	7	1	1	1	2.7	100	6.64	4.1949e-17			350174				285612
Q9NP62	Chorion-specific transcription factor GCMa OS=Homo sapiens OX=9606 GN=GCM1 PE=1 SV=1	6	1	1	1	3.18	100	6.64	4.1949e-17			1.60686e+06				1.3106e+06
Q9P2D1	Chromodomain-helicase-DNA-binding protein 7 OS=Homo sapiens OX=9606 GN=CHD7 PE=1 SV=3	1	2	3	2	3.36	100	6.64	4.1949e-17			644956				526045
O95239	Chromosome-associated kinesin KIF4A OS=Homo sapiens OX=9606 GN=KIF4A PE=1 SV=3	4	2	2	2	4.52	100	6.64	4.1949e-17			325773				265710
Q8NDM7	Cilia- and flagella-associated protein 43 OS=Homo sapiens OX=9606 GN=CFAP43 PE=2 SV=3	3	3	3	3	6	100	6.64	4.1949e-17			1.05164e+06					667225
O15516	Circadian locomoter output cycles protein kaput OS=Homo sapiens OX=9606 GN=CLOCK PE=1 SV=1	4	2	2	2	4.24	100	6.64	4.1949e-17			417798				393922	229309
O60641	Clathrin coat assembly protein AP180 OS=Homo sapiens OX=9606 GN=SNAP91 PE=1 SV=2	3	2	2	2	4.76	100	6.64	4.1949e-17			244796				199663
P78369	Claudin-10 OS=Homo sapiens OX=9606 GN=CLDN10 PE=1 SV=2	7	1	1	1	2.22	100	6.64	4.1949e-17			583296				644068		430862
Q96BQ5	Coiled-coil domain-containing protein 127 OS=Homo sapiens OX=9606 GN=CCDC127 PE=1 SV=1	10	1	2	1	5.69	100	6.64	4.1949e-17			758010				595856		786506
J3KP97	Coiled-coil domain-containing protein 18 (Fragment) OS=Homo sapiens OX=9606 GN=CCDC18 PE=1 SV=1	2	2	2	2	4.2	100	6.64	4.1949e-17			120149						120149
A0A1B0GTI1	Coiled-coil domain-containing protein 201 OS=Homo sapiens OX=9606 GN=CCDC201 PE=4 SV=1	12	1	1	1	2.78	100	6.64	4.1949e-17			692149				434827	570139
Q9UMD9	Collagen alpha-1(XVII) chain OS=Homo sapiens OX=9606 GN=COL17A1 PE=1 SV=3	4	3	3	3	7.29	100	6.64	4.1949e-17			303883				331329	192802	249254
Q04656	Copper-transporting ATPase 1 OS=Homo sapiens OX=9606 GN=ATP7A PE=1 SV=4	3	2	2	2	4.79	100	6.64	4.1949e-17			560897					340528	586163
Q9NY25	C-type lectin domain family 5 member A OS=Homo sapiens OX=9606 GN=CLEC5A PE=1 SV=1	12	1	5	1	10.45	100	6.64	4.1949e-17			2.72263e+06					1.68038e+06	2.79882e+06
Q86VP6	Cullin-associated NEDD8-dissociated protein 1 OS=Homo sapiens OX=9606 GN=CAND1 PE=1 SV=2	2	1	1	1	2.5	100	6.64	4.1949e-17			1.11628e+06				910469
H3BR52	Cytochrome b(558) alpha chain OS=Homo sapiens OX=9606 GN=CYBA PE=1 SV=1	25	1	1	1	3.1	100	6.64	4.1949e-17			699686					384877	807029
C9JFR7	Cytochrome c (Fragment) OS=Homo sapiens OX=9606 GN=CYCS PE=1 SV=1	16	1	1	1	2.12	100	6.64	4.1949e-17			1.35832e+06					861803
Q6UW02	Cytochrome P450 20A1 OS=Homo sapiens OX=9606 GN=CYP20A1 PE=1 SV=1	6	1	1	1	2.64	100	6.64	4.1949e-17			153247				176717	49251.1	153247
Q6NT55	Cytochrome P450 4F22 OS=Homo sapiens OX=9606 GN=CYP4F22 PE=1 SV=1	3	1	1	1	2.07	100	6.64	4.1949e-17			654686					435883	623881
B4DQ75	Death-associated protein 1 OS=Homo sapiens OX=9606 GN=DAP PE=1 SV=1	6	1	2	1	3.56	100	6.64	4.1949e-17			292316				80939.1	546319
P32926	Desmoglein-3 OS=Homo sapiens OX=9606 GN=DSG3 PE=1 SV=2	2	1	1	1	2.65	100	6.64	4.1949e-17			928268				1.36189e+06	567958	928268
A0A7I2V2R5	Dipeptidyl peptidase 4 OS=Homo sapiens OX=9606 GN=DPP4 PE=1 SV=1	3	1	1	1	2.82	100	6.64	4.1949e-17			243317				128267	154375	278000
C9JNT2	DNA excision repair protein ERCC-8 (Fragment) OS=Homo sapiens OX=9606 GN=ERCC8 PE=1 SV=1	15	1	1	1	2.52	100	6.64	4.1949e-17			651757				531592
E5RFF9	DNA replication complex GINS protein SLD5 OS=Homo sapiens OX=9606 GN=GINS4 PE=1 SV=1	9	1	1	1	2.11	100	6.64	4.1949e-17			887999					717865	696928
F8W689	DNA-binding protein RFX5 (Fragment) OS=Homo sapiens OX=9606 GN=RFX5 PE=1 SV=1	3	1	1	1	2.86	100	6.64	4.1949e-17			326148				483520	153490	326148
P24928	DNA-directed RNA polymerase II subunit RPB1 OS=Homo sapiens OX=9606 GN=POLR2A PE=1 SV=2	1	1	1	1	2.69	100	6.64	4.1949e-17			212261						212261
E9PRW3	DnaJ homolog subfamily C member 24 OS=Homo sapiens OX=9606 GN=DNAJC24 PE=1 SV=1	19	1	1	1	1.7	100	6.64	4.1949e-17			71794.8				48696.1		86334.5
P51452	Dual specificity protein phosphatase 3 OS=Homo sapiens OX=9606 GN=DUSP3 PE=1 SV=1	11	1	1	1	2.54	100	6.64	4.1949e-17			310168						310168
E9PG32	Dynein heavy chain 12, axonemal OS=Homo sapiens OX=9606 GN=DNAH12 PE=1 SV=2	1	2	2	2	5.03	100	6.64	4.1949e-17			552270				463245	350394	481865
A0A5H1ZRP8	Dystrophin OS=Homo sapiens OX=9606 GN=DMD PE=1 SV=1	5	8	14	8	37.18	100	6.64	4.1949e-17			296671				190706		376424
H7C4H5	E3 ubiquitin-protein ligase makorin-1 (Fragment) OS=Homo sapiens OX=9606 GN=MKRN1 PE=4 SV=1	21	1	1	1	2.1	100	6.64	4.1949e-17			62524.8				50997.1
Q32P44	Echinoderm microtubule-associated protein-like 3 OS=Homo sapiens OX=9606 GN=EML3 PE=1 SV=1	3	1	1	1	2.52	100	6.64	4.1949e-17			382492				310511	380216	382492
F5GWU3	Enoyl-CoA hydratase domain-containing protein 2, mitochondrial (Fragment) OS=Homo sapiens OX=9606 GN=ECHDC2 PE=1 SV=1	8	1	1	1	2.15	100	6.64	4.1949e-17			613148				706014	341376	613148
O75477	Erlin-1 OS=Homo sapiens OX=9606 GN=ERLIN1 PE=1 SV=2	4	1	2	1	5.29	100	6.64	4.1949e-17			255307				212871	158455
A0A1B0GUS9	Espin (Fragment) OS=Homo sapiens OX=9606 GN=ESPN PE=1 SV=1	5	1	1	1	1.51	100	6.64	4.1949e-17			146155				70373.4		247579
Q9UKW6	ETS-related transcription factor Elf-5 OS=Homo sapiens OX=9606 GN=ELF5 PE=1 SV=2	10	1	6	1	17.65	100	6.64	4.1949e-17			428384				336765		444459
F8W9B8	Exocyst complex component 5 OS=Homo sapiens OX=9606 GN=EXOC5 PE=1 SV=1	4	2	5	2	10.58	100	6.64	4.1949e-17			364953					410139	206039
Q93063	Exostosin-2 OS=Homo sapiens OX=9606 GN=EXT2 PE=1 SV=1	3	1	1	1	2.78	100	6.64	4.1949e-17			252078					143845	280274
O43909	Exostosin-like 3 OS=Homo sapiens OX=9606 GN=EXTL3 PE=1 SV=1	4	3	3	3	6.37	100	6.64	4.1949e-17			456478					339457	389458
Q9HAV4	Exportin-5 OS=Homo sapiens OX=9606 GN=XPO5 PE=1 SV=1	5	2	5	2	8.69	100	6.64	4.1949e-17			384360				313495
Q86XX4	Extracellular matrix organizing protein FRAS1 OS=Homo sapiens OX=9606 GN=FRAS1 PE=1 SV=2	1	3	4	3	7.46	100	6.64	4.1949e-17			712871				791760	370298	712871
Q08945	FACT complex subunit SSRP1 OS=Homo sapiens OX=9606 GN=SSRP1 PE=1 SV=1	3	1	1	1	2.55	100	6.64	4.1949e-17			403556				270040	256041	514255
A0A499FJN5	Ferrochelatase OS=Homo sapiens OX=9606 GN=FECH PE=1 SV=1	5	1	2	1	5.85	100	6.64	4.1949e-17			113018						113018
F8VX65	Fibroblast growth factor receptor substrate 2 (Fragment) OS=Homo sapiens OX=9606 GN=FRS2 PE=1 SV=1	20	2	2	2	4.51	100	6.64	4.1949e-17			474209				397929	292438
Q9UKJ3	G patch domain-containing protein 8 OS=Homo sapiens OX=9606 GN=GPATCH8 PE=1 SV=2	2	3	3	3	4.74	100	6.64	4.1949e-17			388636				193636	403644
D6RD79	GDT1 family protein OS=Homo sapiens OX=9606 GN=TMEM165 PE=1 SV=1	8	1	1	1	1.52	100	6.64	4.1949e-17			266273					168940
Q16478	Glutamate receptor ionotropic, kainate 5 OS=Homo sapiens OX=9606 GN=GRIK5 PE=2 SV=2	2	1	1	1	2.2	100	6.64	4.1949e-17			630438				552236		587021
A6NDK9	Golgin subfamily A member 6C OS=Homo sapiens OX=9606 GN=GOLGA6C PE=3 SV=1	2	1	1	1	2.17	100	6.64	4.1949e-17			59518.4				34539.1		83653.7
J3QRL5	Growth factor receptor-bound protein 2 OS=Homo sapiens OX=9606 GN=GRB2 PE=1 SV=1	16	1	1	1	2.92	100	6.64	4.1949e-17			162841						162841
P08238	Heat shock protein HSP 90-beta OS=Homo sapiens OX=9606 GN=HSP90AB1 PE=1 SV=4	3	2	2	2	4.51	100	6.64	4.1949e-17			560897					340528	586163
B0QXZ9	HMG domain-containing protein 4 (Fragment) OS=Homo sapiens OX=9606 GN=HMGXB4 PE=1 SV=1	6	1	1	1	2.3	100	6.64	4.1949e-17			162784				101836	103280	471077
P43699	Homeobox protein Nkx-2.1 OS=Homo sapiens OX=9606 GN=NKX2-1 PE=1 SV=1	20	2	4	2	10.61	100	6.64	4.1949e-17			1.60008e+06				1.30507e+06
Q96JB3	Hypermethylated in cancer 2 protein OS=Homo sapiens OX=9606 GN=HIC2 PE=1 SV=2	5	1	1	1	2.83	100	6.64	4.1949e-17			232643				189750	96461.6	258091
P01880	Immunoglobulin heavy constant delta OS=Homo sapiens OX=9606 GN=IGHD PE=1 SV=3	9	1	1	1	3.26	100	6.64	4.1949e-17			925216					587014
P04433	Immunoglobulin kappa variable 3-11 OS=Homo sapiens OX=9606 GN=IGKV3-11 PE=1 SV=1	26	1	1	1	3.14	100	6.64	4.1949e-17			663379				541072
O14654	Insulin receptor substrate 4 OS=Homo sapiens OX=9606 GN=IRS4 PE=1 SV=1	2	1	1	1	2.68	100	6.64	4.1949e-17			583531					370229
A0A087WWS6	Interferon alpha-1/13 OS=Homo sapiens OX=9606 GN=IFNA13 PE=1 SV=1	11	1	2	1	5.78	100	6.64	4.1949e-17			315770				257552
A0A7P0T9I6	Interferon-induced GTP-binding protein Mx1 OS=Homo sapiens OX=9606 GN=MX1 PE=4 SV=1	1	1	1	1	2.09	100	6.64	4.1949e-17			550898					349524
A0A1B0GWK2	Kazrin OS=Homo sapiens OX=9606 GN=KAZN PE=1 SV=1	2	1	1	1	2.59	100	6.64	4.1949e-17			141583						141583
A6NCF5	Kelch-like protein 33 OS=Homo sapiens OX=9606 GN=KLHL33 PE=4 SV=2	6	2	2	2	4.01	100	6.64	4.1949e-17			485676						485676
A0A0G2JN05	Killer cell immunoglobulin-like receptor 3DS1 OS=Homo sapiens OX=9606 GN=KIR3DS1 PE=4 SV=1	9	1	1	1	2.94	100	6.64	4.1949e-17			277174					190798	255469
A0A2R8Y4X0	Kinase suppressor of Ras 1 OS=Homo sapiens OX=9606 GN=KSR1 PE=1 SV=1	3	1	1	1	3.32	100	6.64	4.1949e-17			297802				251926	182171
O75037	Kinesin-like protein KIF21B OS=Homo sapiens OX=9606 GN=KIF21B PE=1 SV=2	1	1	1	1	2.58	100	6.64	4.1949e-17			144304				117699
A0A494BYR6	Kinesin-like protein OS=Homo sapiens OX=9606 GN=KIF18B PE=1 SV=1	4	2	2	2	4.72	100	6.64	4.1949e-17			551080					172640	1.11607e+06
E9PC85	Leucine-rich repeat serine/threonine-protein kinase 2 OS=Homo sapiens OX=9606 GN=LRRK2 PE=1 SV=1	1	1	1	1	2	100	6.64	4.1949e-17			321588				262297	227433	178364
Q0VAA2	Leucine-rich repeat-containing protein 74A OS=Homo sapiens OX=9606 GN=LRRC74A PE=2 SV=2	11	2	3	2	8.3	100	6.64	4.1949e-17			462436					902683	150305
P29376	Leukocyte tyrosine kinase receptor OS=Homo sapiens OX=9606 GN=LTK PE=1 SV=3	3	1	3	1	6.7	100	6.64	4.1949e-17			445513					282661
Q6GPG7	Lysophosphatidic acid receptor 1 OS=Homo sapiens OX=9606 GN=LPAR1 PE=1 SV=1	5	1	1	1	2.52	100	6.64	4.1949e-17			552270				463245	350394	481865
H0YJ82	Lysosomal cobalamin transporter ABCD4 (Fragment) OS=Homo sapiens OX=9606 GN=ABCD4 PE=1 SV=1	9	1	2	1	4.25	100	6.64	4.1949e-17			846441				690383
E9PEK4	Macrophage colony-stimulating factor 1 receptor OS=Homo sapiens OX=9606 GN=CSF1R PE=1 SV=1	4	1	1	1	3	100	6.64	4.1949e-17			120098				105864		111126
A0A087X0S2	Major facilitator superfamily domain-containing protein 4A (Fragment) OS=Homo sapiens OX=9606 GN=MFSD4A PE=4 SV=1	17	1	8	1	19.76	100	6.64	4.1949e-17			573946					594887	351328
A8MXP9	Matrin-3 OS=Homo sapiens OX=9606 GN=MATR3 PE=1 SV=1	4	1	2	1	5.14	100	6.64	4.1949e-17			461827					293012
A0A140T9V1	Megakaryocyte and platelet inhibitory receptor G6b OS=Homo sapiens OX=9606 GN=MPIG6B PE=1 SV=1	4	1	1	1	1.57	100	6.64	4.1949e-17			328546						328546
F8VRS5	Meiosis regulator and mRNA stability factor 1 (Fragment) OS=Homo sapiens OX=9606 GN=MARF1 PE=1 SV=1	16	1	4	1	11.08	100	6.64	4.1949e-17			133125				108581	145745	127735
Q96M61	Melanoma-associated antigen B18 OS=Homo sapiens OX=9606 GN=MAGEB18 PE=1 SV=2	8	2	2	2	3.7	100	6.64	4.1949e-17			224026					242530	131292
A0A0D9SGI1	Membrane-associated guanylate kinase, WW and PDZ domain-containing protein 2 OS=Homo sapiens OX=9606 GN=MAGI2 PE=1 SV=1	2	2	2	2	3.36	100	6.64	4.1949e-17			1.22371e+06						1.22371e+06
H3BUX1	Mesothelin (Fragment) OS=Homo sapiens OX=9606 GN=MSLN PE=1 SV=1	3	1	1	1	1.84	100	6.64	4.1949e-17			356473					183036	440476
Q9P2G4	Microtubule-associated protein 10 OS=Homo sapiens OX=9606 GN=MAP10 PE=1 SV=2	2	1	2	1	4.5	100	6.64	4.1949e-17			365554					231930
Q8N4C8	Misshapen-like kinase 1 OS=Homo sapiens OX=9606 GN=MINK1 PE=1 SV=2	2	1	1	1	2.81	100	6.64	4.1949e-17			1.397e+06					886340
Q99683	Mitogen-activated protein kinase kinase kinase 5 OS=Homo sapiens OX=9606 GN=MAP3K5 PE=1 SV=1	2	2	3	1	5.88	100	6.64	4.1949e-17			142165						142165
D6REQ3	Mothers against decapentaplegic homolog 1 (Fragment) OS=Homo sapiens OX=9606 GN=SMAD1 PE=1 SV=1	27	1	1	1	2.56	100	6.64	4.1949e-17			296671				190706		376424
P50219	Motor neuron and pancreas homeobox protein 1 OS=Homo sapiens OX=9606 GN=MNX1 PE=1 SV=3	2	1	1	1	1.66	100	6.64	4.1949e-17			134189						134189
Q9Y2K3	Myosin-15 OS=Homo sapiens OX=9606 GN=MYH15 PE=1 SV=5	4	3	3	3	7.53	100	6.64	4.1949e-17			560946					284889	700763
F8W0U9	NACHT domain- and WD repeat-containing protein 1 OS=Homo sapiens OX=9606 GN=NWD1 PE=1 SV=1	1	1	1	1	2.29	100	6.64	4.1949e-17			371088				383722	185711
Q9BQG2	NAD-capped RNA hydrolase NUDT12 OS=Homo sapiens OX=9606 GN=NUDT12 PE=1 SV=1	5	1	1	1	2.55	100	6.64	4.1949e-17			515669				420595
G3V3I2	N-alpha-acetyltransferase 30 OS=Homo sapiens OX=9606 GN=NAA30 PE=1 SV=1	37	1	1	1	2.04	100	6.64	4.1949e-17			791588				366438		1.39473e+06
Q8WY41	Nanos homolog 1 OS=Homo sapiens OX=9606 GN=NANOS1 PE=1 SV=2	12	2	2	2	5.07	100	6.64	4.1949e-17			924985				569454	777516
Q8IZJ1	Netrin receptor UNC5B OS=Homo sapiens OX=9606 GN=UNC5B PE=1 SV=2	1	1	1	1	1.77	100	6.64	4.1949e-17			115892						115892
Q09666	Neuroblast differentiation-associated protein AHNAK OS=Homo sapiens OX=9606 GN=AHNAK PE=1 SV=2	2	7	7	7	16.8	100	6.64	4.1949e-17			414779				680763	241202	414779
A0A087WZE1	Neuroblastoma breakpoint family member 9 OS=Homo sapiens OX=9606 GN=NBPF9 PE=4 SV=1	6	2	2	2	6	100	6.64	4.1949e-17			924916						924916
A2RRP1	Neuroblastoma-amplified sequence OS=Homo sapiens OX=9606 GN=NBAS PE=1 SV=2	1	1	1	1	2.51	100	6.64	4.1949e-17			303857				272599	175272
A0A2R8Y6F7	Neuroligin-4, X-linked (Fragment) OS=Homo sapiens OX=9606 GN=NLGN4X PE=4 SV=1	32	1	2	1	5.49	100	6.64	4.1949e-17			370666					175522	496636
Q8IVL1	Neuron navigator 2 OS=Homo sapiens OX=9606 GN=NAV2 PE=1 SV=3	1	2	2	2	4.33	100	6.64	4.1949e-17			596420				114184	644010	596420
Q6ZVC0	Neuronal tyrosine-phosphorylated phosphoinositide-3-kinase adapter 1 OS=Homo sapiens OX=9606 GN=NYAP1 PE=2 SV=1	2	1	1	1	2.44	100	6.64	4.1949e-17			893283				1.0559e+06	391069
Q5T1S8	Noncompact myelin-associated protein OS=Homo sapiens OX=9606 GN=NCMAP PE=3 SV=1	20	1	1	1	2.13	100	6.64	4.1949e-17			464711				379032	176510	483707
P23497	Nuclear autoantigen Sp-100 OS=Homo sapiens OX=9606 GN=SP100 PE=1 SV=3	4	2	3	2	6.24	100	6.64	4.1949e-17			418607				343739		415794
A0A087WY61	Nuclear mitotic apparatus protein 1 OS=Homo sapiens OX=9606 GN=NUMA1 PE=1 SV=1	1	1	1	1	2.74	100	6.64	4.1949e-17			1.52715e+06						1.52715e+06
Q15788	Nuclear receptor coactivator 1 OS=Homo sapiens OX=9606 GN=NCOA1 PE=1 SV=3	3	2	5	2	14.27	100	6.64	4.1949e-17			573986						573986
Q96BF6	Nucleus accumbens-associated protein 2 OS=Homo sapiens OX=9606 GN=NACC2 PE=1 SV=1	4	1	1	1	2.13	100	6.64	4.1949e-17			61098.3				42678.9	45263
O76099	Olfactory receptor 7C1 OS=Homo sapiens OX=9606 GN=OR7C1 PE=2 SV=1	3	1	7	1	11.98	100	6.64	4.1949e-17			616102				863099		358705
A0A1B0GUH0	Oxygen-regulated protein 1 OS=Homo sapiens OX=9606 GN=RP1 PE=1 SV=1	1	2	2	2	3.28	100	6.64	4.1949e-17			33204.4					25917.8	26989.8
Q96GU1	P antigen family member 5 OS=Homo sapiens OX=9606 GN=PAGE5 PE=1 SV=2	7	1	1	1	1.8	100	6.64	4.1949e-17			675153				587479		632857
A0A384DVU0	Patatin-like phospholipase domain-containing protein 6 OS=Homo sapiens OX=9606 GN=PNPLA6 PE=1 SV=1	6	3	3	3	7.72	100	6.64	4.1949e-17			1.34352e+06				1.21262e+06	770306
E7ET17	Peroxisomal multifunctional enzyme type 2 OS=Homo sapiens OX=9606 GN=HSD17B4 PE=1 SV=1	3	1	3	1	7.1	100	6.64	4.1949e-17			722623				210096	517304	722623
Q13515	Phakinin OS=Homo sapiens OX=9606 GN=BFSP2 PE=1 SV=1	11	2	2	2	4.75	100	6.64	4.1949e-17			151744				66374.9	96275.9	188502
A0A0J9YWV8	Phosphatase and actin regulator 4 (Fragment) OS=Homo sapiens OX=9606 GN=PHACTR4 PE=1 SV=1	23	1	3	1	8.77	100	6.64	4.1949e-17			470936				344853		524544
H7BYW6	Platelet-derived growth factor subunit A (Fragment) OS=Homo sapiens OX=9606 GN=PDGFA PE=1 SV=2	12	1	3	1	8.25	100	6.64	4.1949e-17			426775				209388	327345	426775
P51805	Plexin-A3 OS=Homo sapiens OX=9606 GN=PLXNA3 PE=1 SV=2	2	2	2	2	5.61	100	6.64	4.1949e-17			696776					442078
O60486	Plexin-C1 OS=Homo sapiens OX=9606 GN=PLXNC1 PE=1 SV=1	4	2	2	2	5.4	100	6.64	4.1949e-17			49871.9				33321.2		60881.5
Q8IXJ9	Polycomb group protein ASXL1 OS=Homo sapiens OX=9606 GN=ASXL1 PE=1 SV=4	2	1	2	1	5.49	100	6.64	4.1949e-17			924716				768466		907582
A0A0A0MSI2	Polyhomeotic-like protein 2 OS=Homo sapiens OX=9606 GN=PHC2 PE=1 SV=1	4	1	3	1	7.87	100	6.64	4.1949e-17			325773				265710
F8WEA4	Potassium voltage-gated channel subfamily KQT member 5 OS=Homo sapiens OX=9606 GN=KCNQ5 PE=1 SV=1	3	1	1	1	3.01	100	6.64	4.1949e-17			143797				108581	98546.6
Q96E09	PPP2R1A-PPP2R2A-interacting phosphatase regulator 1 OS=Homo sapiens OX=9606 GN=PABIR1 PE=1 SV=1	24	3	3	3	7.29	100	6.64	4.1949e-17			656395						656395
Q9H4Q3	PR domain zinc finger protein 13 OS=Homo sapiens OX=9606 GN=PRDM13 PE=2 SV=2	4	1	1	1	2.58	100	6.64	4.1949e-17			1.77616e+06				1.24425e+06	1.1269e+06	3.81688e+06
M0QY44	Pregnancy-specific beta-1-glycoprotein 1 (Fragment) OS=Homo sapiens OX=9606 GN=PSG1 PE=1 SV=1	18	1	1	1	3.03	100	6.64	4.1949e-17			107417				76852.6		122457
F8VZ18	Probable 18S rRNA (guanine-N(7))-methyltransferase (Fragment) OS=Homo sapiens OX=9606 GN=BUD23 PE=1 SV=1	29	1	1	1	2.8	100	6.64	4.1949e-17			284248				420120	108896	284248
Q86YR7	Probable guanine nucleotide exchange factor MCF2L2 OS=Homo sapiens OX=9606 GN=MCF2L2 PE=2 SV=3	2	1	1	1	2.12	100	6.64	4.1949e-17			311368				253462	197940
P07711	Procathepsin L OS=Homo sapiens OX=9606 GN=CTSL PE=1 SV=2	8	2	2	2	4.04	100	6.64	4.1949e-17			163576				74504	118898	163576
Q9BVL4	Protein adenylyltransferase SelO, mitochondrial OS=Homo sapiens OX=9606 GN=SELENOO PE=1 SV=3	7	2	3	2	8.4	100	6.64	4.1949e-17			368474				300538	280464	331627
Q8NAA4	Protein Atg16l2 OS=Homo sapiens OX=9606 GN=ATG16L2 PE=1 SV=2	7	3	5	3	10.03	100	6.64	4.1949e-17			437094				345432		451107
O60610	Protein diaphanous homolog 1 OS=Homo sapiens OX=9606 GN=DIAPH1 PE=1 SV=2	5	3	3	2	8.02	100	6.64	4.1949e-17			887927				501494	813557
Q9Y219	Protein jagged-2 OS=Homo sapiens OX=9606 GN=JAG2 PE=1 SV=3	3	1	1	1	3.21	100	6.64	4.1949e-17			290941				237301
K7EPK7	Protein maestro (Fragment) OS=Homo sapiens OX=9606 GN=MRO PE=4 SV=1	11	1	1	1	2.09	100	6.64	4.1949e-17			389168						389168
Q5JSZ5	Protein PRRC2B OS=Homo sapiens OX=9606 GN=PRRC2B PE=1 SV=2	1	2	2	2	4.04	100	6.64	4.1949e-17			522513				426177	148531	577540
E9PJP2	Protein SOGA3 OS=Homo sapiens OX=9606 GN=SOGA3 PE=1 SV=1	4	2	2	2	4.45	100	6.64	4.1949e-17			439294				460565		341754
Q9UPX0	Protein turtle homolog B OS=Homo sapiens OX=9606 GN=IGSF9B PE=2 SV=2	3	2	2	2	4.84	100	6.64	4.1949e-17			648865					363646	734572
O75695	Protein XRP2 OS=Homo sapiens OX=9606 GN=RP2 PE=1 SV=4	5	1	1	1	2.16	100	6.64	4.1949e-17			73200.3				59704.3	40392.2	92848.1
Q9Y5G8	Protocadherin gamma-A5 OS=Homo sapiens OX=9606 GN=PCDHGA5 PE=2 SV=1	1	1	1	1	2.08	100	6.64	4.1949e-17			569723				464683
Q58FG1	Putative heat shock protein HSP 90-alpha A4 OS=Homo sapiens OX=9606 GN=HSP90AA4P PE=5 SV=1	7	2	2	2	5.06	100	6.64	4.1949e-17			44109.3				34959.1		45393.4
Q8NE18	Putative methyltransferase NSUN7 OS=Homo sapiens OX=9606 GN=NSUN7 PE=2 SV=4	9	2	2	2	5.15	100	6.64	4.1949e-17			344798						344798
Q96M42	Putative uncharacterized protein encoded by LINC00479 OS=Homo sapiens OX=9606 GN=LINC00479 PE=5 SV=2	10	1	1	1	2	100	6.64	4.1949e-17			386410				940842	130015	386410
Q6ZTQ3	Ras association domain-containing protein 6 OS=Homo sapiens OX=9606 GN=RASSF6 PE=1 SV=1	10	2	2	2	4.31	100	6.64	4.1949e-17			173291						173291
Q5U651	Ras-interacting protein 1 OS=Homo sapiens OX=9606 GN=RASIP1 PE=1 SV=1	3	1	2	1	5.3	100	6.64	4.1949e-17			351484				532324		189291
E9PKL7	Ras-related protein Rab-2A OS=Homo sapiens OX=9606 GN=RAB2A PE=1 SV=1	21	2	2	2	4.83	100	6.64	4.1949e-17			291945					265038	204032
Q16849	Receptor-type tyrosine-protein phosphatase-like N OS=Homo sapiens OX=9606 GN=PTPRN PE=1 SV=1	2	1	1	1	2.21	100	6.64	4.1949e-17			39273.5				18562.9	68609.2	39273.5
B4DV59	REST corepressor 3 OS=Homo sapiens OX=9606 GN=RCOR3 PE=1 SV=1	13	2	2	2	4.59	100	6.64	4.1949e-17			555578						555578
P18545	Retinal rod rhodopsin-sensitive cGMP 3',5'-cyclic phosphodiesterase subunit gamma OS=Homo sapiens OX=9606 GN=PDE6G PE=1 SV=1	8	1	2	1	3.52	100	6.64	4.1949e-17			71794.8				48696.1		86334.5
Q2M1Z3	Rho GTPase-activating protein 31 OS=Homo sapiens OX=9606 GN=ARHGAP31 PE=1 SV=2	2	2	2	2	4.15	100	6.64	4.1949e-17			569597				259427	361387	680978
O75116	Rho-associated protein kinase 2 OS=Homo sapiens OX=9606 GN=ROCK2 PE=1 SV=4	4	3	3	3	7.02	100	6.64	4.1949e-17			396603				323481
Q92979	Ribosomal RNA small subunit methyltransferase NEP1 OS=Homo sapiens OX=9606 GN=EMG1 PE=1 SV=4	11	2	2	2	4.39	100	6.64	4.1949e-17			96840.1					61441.4
Q9BXT6	RNA helicase Mov10l1 OS=Homo sapiens OX=9606 GN=MOV10L1 PE=2 SV=1	2	1	1	1	2.71	100	6.64	4.1949e-17			339618					215475
D6RA70	RNA helicase OS=Homo sapiens OX=9606 GN=YTHDC2 PE=1 SV=1	3	1	1	1	2.84	100	6.64	4.1949e-17			284127				231742
Q6NSI4	RPA-related protein RADX OS=Homo sapiens OX=9606 GN=RADX PE=1 SV=2	5	3	3	3	5.53	100	6.64	4.1949e-17			364625				441542		245592
H3BR29	RUS family member 1 OS=Homo sapiens OX=9606 GN=RUSF1 PE=1 SV=1	8	2	2	2	5.09	100	6.64	4.1949e-17			23183.5				18541.3		23643.5
Q96Q15	Serine/threonine-protein kinase SMG1 OS=Homo sapiens OX=9606 GN=SMG1 PE=1 SV=3	1	2	2	2	4.61	100	6.64	4.1949e-17			204705					98044.7	271168
A6NKC9	SH2 domain-containing protein 7 OS=Homo sapiens OX=9606 GN=SH2D7 PE=4 SV=2	6	1	1	1	2.05	100	6.64	4.1949e-17			229434				41723.7	145567	289929
Q8IX30	Signal peptide, CUB and EGF-like domain-containing protein 3 OS=Homo sapiens OX=9606 GN=SCUBE3 PE=1 SV=1	3	1	4	1	12.17	100	6.64	4.1949e-17			309666						309666
H0YGF6	Single-stranded DNA cytosine deaminase (Fragment) OS=Homo sapiens OX=9606 GN=AICDA PE=1 SV=1	8	1	1	1	3.02	100	6.64	4.1949e-17			533853				249600	590877
A0A0A0MSC8	Slit homolog 3 protein OS=Homo sapiens OX=9606 GN=SLIT3 PE=1 SV=1	2	2	2	2	4.4	100	6.64	4.1949e-17			373297				293332		387475
A0A1B0GUN7	Sodium channel protein type 1 subunit alpha (Fragment) OS=Homo sapiens OX=9606 GN=SCN1A PE=1 SV=1	7	1	1	1	2.51	100	6.64	4.1949e-17			262168					179916	242379
B8ZZY4	Solute carrier family 35 member F5 OS=Homo sapiens OX=9606 GN=SLC35F5 PE=1 SV=1	12	2	6	2	13.89	100	6.64	4.1949e-17			462436					902683	150305
Q9NYB5	Solute carrier organic anion transporter family member 1C1 OS=Homo sapiens OX=9606 GN=SLCO1C1 PE=2 SV=1	6	2	2	2	5.09	100	6.64	4.1949e-17			365554					231930
H7BXR3	Sorbin and SH3 domain-containing protein 2 (Fragment) OS=Homo sapiens OX=9606 GN=SORBS2 PE=1 SV=1	6	2	4	1	9.94	100	6.64	4.1949e-17			800225				1031488		506352
E9PS32	Sortilin-related receptor OS=Homo sapiens OX=9606 GN=SORL1 PE=1 SV=1	5	2	2	2	5.34	100	6.64	4.1949e-17			659757						659757
Q8WV41	Sorting nexin-33 OS=Homo sapiens OX=9606 GN=SNX33 PE=1 SV=1	14	2	2	2	3.01	100	6.64	4.1949e-17			144531				78279.4		217654
O95219	Sorting nexin-4 OS=Homo sapiens OX=9606 GN=SNX4 PE=1 SV=1	13	3	3	3	7.57	100	6.64	4.1949e-17			396603				323481
Q5VXG6	SPATA21 protein OS=Homo sapiens OX=9606 GN=SPATA21 PE=2 SV=1	19	1	1	1	3.4	100	6.64	4.1949e-17			164811				134425
H0YJE6	Spectrin beta chain, erythrocytic (Fragment) OS=Homo sapiens OX=9606 GN=SPTB PE=1 SV=1	3	1	1	1	3.08	100	6.64	4.1949e-17			176498				102991	156523
Q12770	Sterol regulatory element-binding protein cleavage-activating protein OS=Homo sapiens OX=9606 GN=SCAP PE=1 SV=4	2	1	1	1	2.59	100	6.64	4.1949e-17			1.67713e+06				1.36792e+06
A0A3B3IU55	Stonin-2 OS=Homo sapiens OX=9606 GN=STON2 PE=1 SV=1	1	1	1	1	2.01	100	6.64	4.1949e-17			678544				608513		617134
A0A0D9SEJ8	Suppressor of hairy wing homolog 2 (Drosophila), isoform CRA_b OS=Homo sapiens OX=9606 GN=ZNF280B PE=1 SV=1	1	1	1	1	1.6	100	6.64	4.1949e-17			315595				334826		242625
Q9UMS6	Synaptopodin-2 OS=Homo sapiens OX=9606 GN=SYNPO2 PE=1 SV=2	1	1	1	1	2.42	100	6.64	4.1949e-17			209117				170562
A0A1W2PPL8	TATA-box-binding protein-associated factor 11-like 14 OS=Homo sapiens OX=9606 GN=TAF11L14 PE=3 SV=1	12	1	5	1	11.5	100	6.64	4.1949e-17			143797				108581	98546.6
F8WDN6	TBC1 domain family member 10A OS=Homo sapiens OX=9606 GN=TBC1D10A PE=1 SV=1	24	1	1	1	3.22	100	6.64	4.1949e-17			516979				577237	239602
Q63HK5	Teashirt homolog 3 OS=Homo sapiens OX=9606 GN=TSHZ3 PE=1 SV=2	2	1	1	1	3.16	100	6.64	4.1949e-17			503288				544648	319317	466591
A0A494BZZ4	Thymidine phosphorylase (Fragment) OS=Homo sapiens OX=9606 GN=TYMP PE=1 SV=1	6	2	2	2	3.86	100	6.64	4.1949e-17			92219.6				53525.6		129592
Q8NFQ8	Torsin-1A-interacting protein 2 OS=Homo sapiens OX=9606 GN=TOR1AIP2 PE=1 SV=1	3	1	1	1	2.47	100	6.64	4.1949e-17			404352				373762	176008	404352
Q9UH73	Transcription factor COE1 OS=Homo sapiens OX=9606 GN=EBF1 PE=1 SV=2	6	1	1	1	2.75	100	6.64	4.1949e-17			270500					171622
Q9HAW0	Transcription factor IIIB 50 kDa subunit OS=Homo sapiens OX=9606 GN=BRF2 PE=1 SV=1	5	1	1	1	2.57	100	6.64	4.1949e-17			160478					101817
Q8N442	Translation factor GUF1, mitochondrial OS=Homo sapiens OX=9606 GN=GUF1 PE=2 SV=1	4	1	2	1	5.19	100	6.64	4.1949e-17			203638						203638
E7ERK9	Translation initiation factor eIF-2B subunit delta OS=Homo sapiens OX=9606 GN=EIF2B4 PE=1 SV=1	6	1	4	1	10.85	100	6.64	4.1949e-17			608307				516312	385947	32579.6
Q969K7	Transmembrane protein 54 OS=Homo sapiens OX=9606 GN=TMEM54 PE=1 SV=1	4	1	2	1	3.16	100	6.64	4.1949e-17			569597				259427	361387	680978
J3QLC5	Transmembrane protein 94 (Fragment) OS=Homo sapiens OX=9606 GN=TMEM94 PE=1 SV=1	3	1	1	1	1.7	100	6.64	4.1949e-17			831783						831783
Q96RU7	Tribbles homolog 3 OS=Homo sapiens OX=9606 GN=TRIB3 PE=1 SV=2	3	1	1	1	1.78	100	6.64	4.1949e-17			36038					34277.7	24038.9
F5H627	Tumor necrosis factor receptor superfamily member 3 OS=Homo sapiens OX=9606 GN=LTBR PE=1 SV=1	8	1	1	1	1.71	100	6.64	4.1949e-17			123858				101022
Q8TF42	Ubiquitin-associated and SH3 domain-containing protein B OS=Homo sapiens OX=9606 GN=UBASH3B PE=1 SV=2	6	2	2	2	5.18	100	6.64	4.1949e-17			86889.2				70869.5	52419	104333
O95873	Uncharacterized protein C6orf47 OS=Homo sapiens OX=9606 GN=C6orf47 PE=1 SV=2	3	1	1	1	1.54	100	6.64	4.1949e-17			55607.3				39835.7	47816.5	55607.3
M0QZD8	Uncharacterized protein OS=Homo sapiens OX=9606 GN=LOC400499 PE=4 SV=3	1	2	2	2	4.17	100	6.64	4.1949e-17			1.34352e+06				1.21262e+06	770306
A0A2R8YFX0	Uncharacterized protein OS=Homo sapiens OX=9606 PE=3 SV=1	9	2	2	2	3.69	100	6.64	4.1949e-17			971693					616502
P17948	Vascular endothelial growth factor receptor 1 OS=Homo sapiens OX=9606 GN=FLT1 PE=1 SV=2	2	2	2	2	4.04	100	6.64	4.1949e-17			3106033						3106033
A0A7P0T8N6	Very low-density lipoprotein receptor (Fragment) OS=Homo sapiens OX=9606 GN=VLDLR PE=4 SV=1	5	2	2	2	4.74	100	6.64	4.1949e-17			758010				595856		786506
Q6ZS81	WD repeat- and FYVE domain-containing protein 4 OS=Homo sapiens OX=9606 GN=WDFY4 PE=1 SV=3	0	1	1	1	2.04	100	6.64	4.1949e-17			743342					471622
A0A3B3IS43	WD repeat-containing protein 49 OS=Homo sapiens OX=9606 GN=WDR49 PE=1 SV=1	1	1	1	1	2.75	100	6.64	4.1949e-17			951488				736184		1.00303e+06
Q99592	Zinc finger and BTB domain-containing protein 18 OS=Homo sapiens OX=9606 GN=ZBTB18 PE=1 SV=1	12	2	2	2	5.09	100	6.64	4.1949e-17			609205				497620	385947
Q8NAP3	Zinc finger and BTB domain-containing protein 38 OS=Homo sapiens OX=9606 GN=ZBTB38 PE=1 SV=2	2	2	2	2	3.67	100	6.64	4.1949e-17			238516				257128	136426	238516
Q49AG3	Zinc finger BED domain-containing protein 5 OS=Homo sapiens OX=9606 GN=ZBED5 PE=2 SV=2	2	1	1	1	2.08	100	6.64	4.1949e-17			232877				281133		157338
Q9NZV7	Zinc finger imprinted 2 OS=Homo sapiens OX=9606 GN=ZIM2 PE=1 SV=1	6	1	1	1	3.01	100	6.64	4.1949e-17			240721					152728
A0A0C4DGM5	Zinc finger protein 106 OS=Homo sapiens OX=9606 GN=ZNF106 PE=1 SV=1	5	2	2	2	5.27	100	6.64	4.1949e-17			474209				397929	292438
Q96K75	Zinc finger protein 514 OS=Homo sapiens OX=9606 GN=ZNF514 PE=2 SV=1	2	1	1	1	2.02	100	6.64	4.1949e-17			606007					684680	340309
Q92618	Zinc finger protein 516 OS=Homo sapiens OX=9606 GN=ZNF516 PE=1 SV=1	4	2	14	2	31.33	100	6.64	4.1949e-17			843708				688154	496735	1.08662e+06
H0YCN3	Zinc finger protein 517 (Fragment) OS=Homo sapiens OX=9606 GN=ZNF517 PE=1 SV=1	10	1	2	1	6.84	100	6.64	4.1949e-17			454051				128994	501410	454051
Q9H0M5	Zinc finger protein 700 OS=Homo sapiens OX=9606 GN=ZNF700 PE=2 SV=1	7	3	3	3	6.77	100	6.64	4.1949e-17			35612.8				24378.2		42433
Q2TB10	Zinc finger protein 800 OS=Homo sapiens OX=9606 GN=ZNF800 PE=1 SV=1	7	2	2	2	5.44	100	6.64	4.1949e-17			416654					264351
A8K0R7	Zinc finger protein 839 OS=Homo sapiens OX=9606 GN=ZNF839 PE=2 SV=1	3	1	1	1	2.55	100	6.64	4.1949e-17			361731				295039	233572	312219
C9JN71	Zinc finger protein 878 OS=Homo sapiens OX=9606 GN=ZNF878 PE=3 SV=2	5	1	1	1	2.59	100	6.64	4.1949e-17			130601				106522
Q9P217	Zinc finger SWIM domain-containing protein 5 OS=Homo sapiens OX=9606 GN=ZSWIM5 PE=2 SV=2	4	2	2	2	5.47	100	6.64	4.1949e-17			277174					190798	255469
O43149	Zinc finger ZZ-type and EF-hand domain-containing protein 1 OS=Homo sapiens OX=9606 GN=ZZEF1 PE=1 SV=6	1	2	2	2	4.53	100	6.64	4.1949e-17			292316				80939.1	546319
Protein ≥1.5 fold abundant in CRT treated NHS
Accession	Description	Coverage [%]	# Peptides	# PSMs	# Unique Peptides	Score Sequest HT: Sequest HT	Abundance Ratio: (NC) / (N)	Abundance Ratio (log2): (NC) / (N)	Abundance Ratio Adj. P-Value: (NC) / (N)	Abundance Ratio Variability [%]: (NC) / (N)	Abundances (Grouped): N	Abundances (Grouped): NC	Abundance: F10: Control, N	Abundance: F11: Control, N	Abundance: F12: Control, N	Abundance: F1: Sample, NC	Abundance: F2: Sample, NC	Abundance: F3: Sample, NC
F6RFD5	Actin-depolymerizing factor OS=Homo sapiens OX=9606 GN=DSTN PE=1 SV=1	16	1	4	1	10.4	2.213	1.15	0.293304	0	161224	356771		74229.2				356771
F8VR50	Actin-related protein 2/3 complex subunit 3 (Fragment) OS=Homo sapiens OX=9606 GN=ARPC3 PE=1 SV=1	20	1	2	1	4.57	2.062	1.04	0.353792	55.57	3.27055e+06	4.86624e+06	368203	1.5058e+06	4.30508e+06	1.10167e+07	2.90156e+06	4.86624e+06
A0A0D9SF70	ADP-ribosylation factor GTPase-activating protein 2 OS=Homo sapiens OX=9606 GN=ARFGAP2 PE=1 SV=1	4	1	1	1	2.16	1.833	0.87	0.462788	78.52	718152	1.31649e+06	154020	702869	269474		835266
E9PL83	Adrenomedullin OS=Homo sapiens OX=9606 GN=ADM PE=1 SV=1	22	1	2	1	5.51	1.943	0.96	0.404622	60.16	1.51741e+06	2.94833e+06	42085.8	698631	1.67797e+06	2.35848e+06	2.17837e+06	2.94833e+06
A0A669KBI3	AF4/FMR2 family member 1 (Fragment) OS=Homo sapiens OX=9606 GN=AFF1 PE=1 SV=1	4	3	3	3	6.07	4.21	2.07	0.0181894	45.04	76345.9	871246		47415.1	37191.7	510613	1.44763e+06	871246
A8MQ02	Afadin OS=Homo sapiens OX=9606 GN=AFDN PE=1 SV=2	3	3	10	3	25.34	1.906	0.93	0.419625	69.53	537378	1.02448e+06	109308	260864		1.34533e+06	403715
A0A7P0T8K3	Alkaline ceramidase 3 OS=Homo sapiens OX=9606 GN=ACER3 PE=4 SV=1	15	1	1	1	2.56	2.089	1.06	0.339819	47.07	309578	477798		93875.9	308871	389706	294718	900786
P01011	Alpha-1-antichymotrypsin OS=Homo sapiens OX=9606 GN=SERPINA3 PE=1 SV=2	31	13	81	13	298.11	1.509	0.59	0.66835	54.9	2.69005e+07	4.15187e+07	4.11594e+06	1.23853e+07	2.49927e+07	3.38639e+07	2.43469e+07	5.08251e+07
P01009	Alpha-1-antitrypsin OS=Homo sapiens OX=9606 GN=SERPINA1 PE=1 SV=3	64	28	672	2	2441.14	1.984	0.99	0.388464	59.49	1.65657e+07	4.08449e+07	1433514	7.62702e+06	1.91777e+07	3.64847e+07	1.87212e+07	4.08449e+07
P08697	Alpha-2-antiplasmin OS=Homo sapiens OX=9606 GN=SERPINF2 PE=1 SV=3	48	11	37	11	133.65	1.807	0.85	0.475583	49.15	5.11868e+06	8.78988e+06	455757	2.3567e+06	3.99761e+06	7.35775e+06	4.1795e+06	8.78988e+06
A0A494C060	Alpha-actinin-2 (Fragment) OS=Homo sapiens OX=9606 GN=ACTN2 PE=1 SV=1	4	1	1	1	2.67	2.768	1.47	0.134121	0	89925.9	248904	19286.1					248904
Q9NTJ4	Alpha-mannosidase 2C1 OS=Homo sapiens OX=9606 GN=MAN2C1 PE=1 SV=1	3	1	1	1	2.89	1.647	0.72	0.567248	0	25914.8	42694.2			17029.1			42694.2
Q9Y2J4	Angiomotin-like protein 2 OS=Homo sapiens OX=9606 GN=AMOTL2 PE=1 SV=3	2	1	1	1	2.11	3.324	1.73	0.0605312	18.15	331917	1.1032e+06	71185.3			796369		1.24649e+06
A0A7P0TBH1	Angiotensinogen OS=Homo sapiens OX=9606 GN=AGT PE=4 SV=1	25	7	15	7	52.64	1.567	0.65	0.624836	47.46	2.34132e+06	4.66245e+06	42686.2	1.07797e+06	2.10467e+06	3.80283e+06	1.66683e+06	4.92285e+06
I3L3R3	AP-4 complex accessory subunit Tepsin OS=Homo sapiens OX=9606 GN=TEPSIN PE=4 SV=1	5	1	1	1	1.74	1.936	0.95	0.406064	51.6	52249.5	101179		34324.1	24063.3		61551.7	105522
O14791	Apolipoprotein L1 OS=Homo sapiens OX=9606 GN=APOL1 PE=1 SV=5	13	3	9	3	31.11	1.518	0.6	0.662312	35.71	251714	439821	38368.5	115892	220323	389157	272986	439821
Q96P50	Arf-GAP with coiled-coil, ANK repeat and PH domain-containing protein 3 OS=Homo sapiens OX=9606 GN=ACAP3 PE=1 SV=2	3	1	1	1	2.71	1.625	0.7	0.582708	68.61	1.13364e+06	1.84183e+06	134566	521941	1.27315e+06	2.24455e+06	1.07291e+06	1.84183e+06
F8W079	ATP synthase subunit beta, mitochondrial (Fragment) OS=Homo sapiens OX=9606 GN=ATP5F1B PE=1 SV=1	6	1	1	1	2.07	2.693	1.43	0.149401	58.03	26449.2	71239.5			17380.3	39654.4	66229.1
A0A3B3ITW3	ATP-binding cassette sub-family D member 3 OS=Homo sapiens OX=9606 GN=ABCD3 PE=1 SV=2	3	1	7	1	15.12	2.034	1.02	0.366595	0	560012	1.13894e+06	120104			928951
H7C514	ATP-dependent DNA/RNA helicase DHX36 (Fragment) OS=Homo sapiens OX=9606 GN=DHX36 PE=1 SV=1	15	1	12	1	29.09	1.96	0.97	0.399784	74.31	961410	2.68054e+06	296997	307307		2.24058e+06	1.7007e+06	880436
O75882	Attractin OS=Homo sapiens OX=9606 GN=ATRN PE=1 SV=2	4	2	2	2	6.04	2.107	1.08	0.331954	57.31	206271	458934	29971.1		200069	25356.9	291176	497271
V9GYB7	Atypical chemokine receptor 2 (Fragment) OS=Homo sapiens OX=9606 GN=ACKR2 PE=1 SV=1	9	1	1	1	2.58	1.677	0.75	0.552566	2.18	36404.6	61062.3	7771.8		24032.4		38173.1	61971.9
E9PK52	Band 4.1-like protein 2 OS=Homo sapiens OX=9606 GN=EPB41L2 PE=1 SV=1	3	2	2	1	3.74	1.78	0.83	0.483935	71.78	1.35218e+06	2402256		356640	1.55106e+06	2.37779e+06	1260957	2402256
A0A087WXM8	Basal cell adhesion molecule OS=Homo sapiens OX=9606 GN=BCAM PE=1 SV=1	3	1	3	1	8.36	1.99	0.99	0.386906	19.51	1.04986e+06	1.89702e+06	182068	483367	793952	1.54727e+06	1.15095e+06	2.40404e+06
K7EJU9	Bifunctional arginine demethylase and lysyl-hydroxylase JMJD6 OS=Homo sapiens OX=9606 GN=JMJD6 PE=1 SV=1	4	2	2	2	3.05	1.58	0.66	0.616054	1.01	28869.7	45610.3			18970.9	36948.4		45922.2
Q9Y2P5	Bile acyl-CoA synthetase OS=Homo sapiens OX=9606 GN=SLC27A5 PE=1 SV=1	3	1	4	1	8.85	1.649	0.72	0.566308	34.18	1.63107e+07	3.21976e+07	2.97308e+06	7.50962e+06	16674045	3.02227e+07	1.45046e+07	3.21976e+07
Q9UIF8	Bromodomain adjacent to zinc finger domain protein 2B OS=Homo sapiens OX=9606 GN=BAZ2B PE=1 SV=3	2	2	2	2	5.43	1.72	0.78	0.520631	65.08	836013	1.53027e+06	110034	627198		1.24813e+06	788713	1.66399e+06
P20851	C4b-binding protein beta chain OS=Homo sapiens OX=9606 GN=C4BPB PE=1 SV=1	42	8	38	8	123.96	1.885	0.91	0.432895	46.75	7.56806e+06	1.39365e+07	269289	3.48442e+06	6.12448e+06	1.27956e+07	7.6999e+06	1.39365e+07
Q14012	Calcium/calmodulin-dependent protein kinase type 1 OS=Homo sapiens OX=9606 GN=CAMK1 PE=1 SV=1	9	1	1	1	3.11	1.996	1	0.383089	17.92	54360.7	108524		22184.6	40300.4		68854.2
XP_040074012.2	calreticulin [Ixodes scapularis]	58	29	283	29	1092	13.432	3.75	4.05292e-06	42.49	1.48651e+06	4.05081e+08	318807	619772	1.72098e+06	2.73508e+08	2.57008e+08	4.76979e+08
I3L375	Carbonic anhydrase-related protein 10 (Fragment) OS=Homo sapiens OX=9606 GN=CA10 PE=1 SV=1	14	2	2	2	5.26	1.743	0.8	0.505899	0.56	47703.3	83142.7	10192.4	22045.9			52750.9
Q96M91	Cilia- and flagella-associated protein 53 OS=Homo sapiens OX=9606 GN=CFAP53 PE=1 SV=2	3	2	2	2	3.15	1.555	0.64	0.633726	39.74	672546	1.18206e+06		229417	596500	964124	560751	1236980
E9PBB9	C-Jun-amino-terminal kinase-interacting protein 1 OS=Homo sapiens OX=9606 GN=MAPK8IP1 PE=1 SV=1	8	3	7	3	18.57	1.679	0.75	0.551623	0	456668	766814			300086		486514
P02746	Complement C1q subcomponent subunit B OS=Homo sapiens OX=9606 GN=C1QB PE=1 SV=3	41	8	54	8	204.79	2.025	1.02	0.371036	59.82	1.36929e+07	3.03456e+07	1.0639e+06	6.30439e+06	1.44568e+07	2.47508e+07	1.27481e+07	3.17279e+07
P09871	Complement C1s subcomponent OS=Homo sapiens OX=9606 GN=C1S PE=1 SV=1	31	12	45	12	164.51	1.591	0.67	0.605817	47.55	8.20746e+06	1.22261e+07	1.01951e+06	3.77881e+06	6.44961e+06	9.97193e+06	7.16946e+06	1.40929e+07
P13671	Complement component C6 OS=Homo sapiens OX=9606 GN=C6 PE=1 SV=3	17	8	17	8	65.9	1.833	0.87	0.462788	41.64	938351	7.12498e+06	141430	760342	616610	3.73424e+06	4.56763e+06	7.12498e+06
P10643	Complement component C7 OS=Homo sapiens OX=9606 GN=C7 PE=1 SV=2	27	11	33	11	138.13	1.695	0.76	0.540545	27.01	2.37718e+06	7.40368e+06	344344	1.09448e+06	3.10277e+06	6.03867e+06	4.22647e+06	9.07347e+06
P07358	Complement component C8 beta chain OS=Homo sapiens OX=9606 GN=C8B PE=1 SV=3	39	11	27	11	108.38	1.652	0.72	0.565178	42.73	4.42992e+06	8.13119e+06	303716	2.10102e+06	2.91099e+06	5.60829e+06	5.15893e+06	9.50842e+06
P02748	Complement component C9 OS=Homo sapiens OX=9606 GN=C9 PE=1 SV=2	33	12	36	12	139.3	1.543	0.63	0.64176	36.08	6.59499e+06	1.02594e+07	767302	3.03641e+06	4.81223e+06	7.4968e+06	6.50918e+06	1.30817e+07
G3V4K0	Cornichon homolog (Drosophila), isoform CRA_c OS=Homo sapiens OX=9606 GN=CNIH1 PE=1 SV=1	9	1	1	1	2.01	2.265	1.18	0.272294	0	445898	1.01007e+06		205297			640851
Q9NRP2	COX assembly mitochondrial protein 2 homolog OS=Homo sapiens OX=9606 GN=CMC2 PE=1 SV=1	13	1	1	1	2.05	1.651	0.72	0.565178	12.76	191923	316787	367578	81375.8	126116	263571		310549
P46527	Cyclin-dependent kinase inhibitor 1B OS=Homo sapiens OX=9606 GN=CDKN1B PE=1 SV=1	22	2	3	2	7.81	2.812	1.49	0.126348	94.16	1.20541e+06	3389152		452473	971558	5.59224e+06	664596	3389152
O75891	Cytosolic 10-formyltetrahydrofolate dehydrogenase OS=Homo sapiens OX=9606 GN=ALDH1L1 PE=1 SV=2	5	1	2	1	7.33	1.837	0.88	0.462255	9.1	136499	250753		58894.3	95714.8		168385	236915
A0A7P0Z4I1	Cytospin-B OS=Homo sapiens OX=9606 GN=SPECC1 PE=4 SV=1	10	3	5	3	12.71	2	1	0.38144	65.98	201637	116356	1.19534e+06	92836.2	29315	83824.2	73823.4	223788
A0A096LNH6	Dedicator of cytokinesis protein 1 OS=Homo sapiens OX=9606 GN=DOCK1 PE=1 SV=1	1	2	3	2	7.42	1.552	0.63	0.635165	34.87	669690	795079	94999.9	322496	440067	648491	475597	1.08738e+06
Q9Y4D1	Disheveled-associated activator of morphogenesis 1 OS=Homo sapiens OX=9606 GN=DAAM1 PE=1 SV=2	5	5	5	5	10.58	2.656	1.41	0.156736	61.59	815521	2.51915e+06	103789	375475	1.0202e+06	2.49631e+06	1.35167e+06	2.51915e+06
P78527	DNA-dependent protein kinase catalytic subunit OS=Homo sapiens OX=9606 GN=PRKDC PE=1 SV=3	2	3	3	3	7.51	6.891	2.78	0.000854648	27.98	652895	4.49934e+06	116069	362642			2854663
O14802	DNA-directed RNA polymerase III subunit RPC1 OS=Homo sapiens OX=9606 GN=POLR3A PE=1 SV=2	2	1	1	1	3.33	3.456	1.79	0.0502655	0	237621	821120	50961.9					821120
Q13202	Dual specificity protein phosphatase 8 OS=Homo sapiens OX=9606 GN=DUSP8 PE=1 SV=2	2	1	1	1	2.1	1.523	0.61	0.657463	13.83	96681.5	147247		44513.3			102545	134148
A0A7P0T890	Dystonin OS=Homo sapiens OX=9606 GN=DST PE=4 SV=1	2	7	7	3	15.15	1.77	0.82	0.485657	30.75	328491	2163811	25819.1		588993	2.52972e+06	946200	2163811
P42892	Endothelin-converting enzyme 1 OS=Homo sapiens OX=9606 GN=ECE1 PE=1 SV=2	3	1	1	1	2.77	2.655	1.41	0.156736	62.18	4.72747e+06	16850002		1.32219e+06	5.11394e+06	17987318	4533655	16850002
E9PS76	Eukaryotic translation initiation factor 1A domain-containing protein (Fragment) OS=Homo sapiens OX=9606 GN=EIF1AD PE=1 SV=1	15	1	2	1	5.17	2.698	1.43	0.148485	112.37	14200.3	116080	65669.5	6537.97	8765.69	30286.2		362879
A0A087X1R4	Female-lethal(2)D homolog OS=Homo sapiens OX=9606 GN=WTAP PE=1 SV=1	5	1	1	1	1.73	1.93	0.95	0.40893	62.2	34968.8	72580.4	11333.1		15206.1	59198.7	63074.2	45829
Q86UX7	Fermitin family homolog 3 OS=Homo sapiens OX=9606 GN=FERMT3 PE=1 SV=1	6	2	2	2	4.85	1.493	0.58	0.675096	0	583524	871369		268661				871369
P02671	Fibrinogen alpha chain OS=Homo sapiens OX=9606 GN=FGA PE=1 SV=2	9	3	3	3	7.96	2.033	1.02	0.366595	23.43	73579.5	149620	16404.7		46510.6	102674	94928.4	207580
P23142	Fibulin-1 OS=Homo sapiens OX=9606 GN=FBLN1 PE=1 SV=4	7	2	6	2	18.48	1.734	0.79	0.511822	49.56	63448.4	111615		20468.1	59505.3	97554.6	64242.9	111615
E7EN95	Filamin-B OS=Homo sapiens OX=9606 GN=FLNB PE=1 SV=1	2	2	2	2	4.9	1.975	0.98	0.39201	20.98	586617	86940.1	125810	353870	340556		63517.3	75501.1
F2Z2D2	Gamma-2-syntrophin OS=Homo sapiens OX=9606 GN=SNTG2 PE=4 SV=1	20	2	2	2	4.16	1.693	0.76	0.542029	64.08	223403	378200		102237	147693	459668	136232	378200
A8MX75	General transcription and DNA repair factor IIH helicase subunit XPD (Fragment) OS=Homo sapiens OX=9606 GN=ERCC2 PE=1 SV=2	2	1	1	1	3.42	1.784	0.84	0.483935	48.13	859570	1.53348e+06	100092	395756	804911	1.25075e+06	898281	2.03127e+06
H0Y5D2	General transcription factor 3C polypeptide 5 (Fragment) OS=Homo sapiens OX=9606 GN=GTF3C5 PE=1 SV=1	39	2	2	2	4.27	1.705	0.77	0.532148	1.13	130640	222704	28018				142374	221020
Q9BZE4	GTP-binding protein 4 OS=Homo sapiens OX=9606 GN=GTPBP4 PE=1 SV=3	3	2	3	2	6.39	1.559	0.64	0.630245	66.61	383015	2.9129e+06		65488.9	677727	2.37585e+06	1.09792e+06	3.20039e+06
C9J0K3	GTP-binding protein 8 OS=Homo sapiens OX=9606 GN=GTPBP8 PE=1 SV=1	17	1	1	1	2.6	2.655	1.41	0.156736	62.18	4.72747e+06	16850002		1.32219e+06	5.11394e+06	17987318	4533655	16850002
A0A494C0U3	GTP-binding protein Rit1 (Fragment) OS=Homo sapiens OX=9606 GN=RIT1 PE=1 SV=1	16	1	3	1	6.89	1.759	0.81	0.493404	45.95	1.13376e+06	1.99376e+06	243155	398502	1.31758e+06			1.99376e+06
P05546	Heparin cofactor 2 OS=Homo sapiens OX=9606 GN=SERPIND1 PE=1 SV=3	33	9	28	9	121.25	1.687	0.75	0.546652	54.77	2.66447e+06	1.12238e+07	79444.8	1.22675e+06	3.44314e+06	9.15444e+06	4.13495e+06	1.13513e+07
Q7Z353	Highly divergent homeobox OS=Homo sapiens OX=9606 GN=HDX PE=1 SV=1	3	1	3	1	7.8	2.768	1.47	0.134121	0	89925.9	248904	19286.1					248904
Q15910	Histone-lysine N-methyltransferase EZH2 OS=Homo sapiens OX=9606 GN=EZH2 PE=1 SV=2	1	1	1	1	1.72	4.778	2.26	0.00884296	10.02	35941.4	171743	7708.25			149545	69020.2	171743
Q96L73	Histone-lysine N-methyltransferase, H3 lysine-36 specific OS=Homo sapiens OX=9606 GN=NSD1 PE=1 SV=1	1	2	2	2	4.63	2.691	1.43	0.149813	0	108173	291105	23199.6					291105
A0A140T9Z3	HLA class II histocompatibility antigen, DO beta chain (Fragment) OS=Homo sapiens OX=9606 GN=HLA-DOB PE=1 SV=1	14	4	4	4	7.87	1.642	0.72	0.571481	40.15	3.50482e+06	5.75585e+06	148758	1.61366e+06	3158309	4694643	2879026	5.79543e+06
Q14520	Hyaluronan-binding protein 2 OS=Homo sapiens OX=9606 GN=HABP2 PE=1 SV=1	8	3	10	3	37.54	1.819	0.86	0.471316	23.73	741988	1.53917e+06	207945	225461	487576	1.2554e+06	805939	1.55318e+06
P0DP04	Immunoglobulin heavy variable 3-43D OS=Homo sapiens OX=9606 GN=IGHV3-43D PE=3 SV=1	25	2	3	1	10.24	1.491	0.58	0.675096	55.76	1.05627e+06	2.22599e+06	120623	486320	991406	2.14419e+06	755188	2.22599e+06
A0A087WW87	Immunoglobulin kappa variable 2-40 OS=Homo sapiens OX=9606 GN=IGKV2-40 PE=3 SV=2	11	1	3	1	10.03	1.663	0.73	0.558411	32.99	910853	1.63883e+06	164092		712549	1.61924e+06	680419	1.63883e+06
P01619	Immunoglobulin kappa variable 3-20 OS=Homo sapiens OX=9606 GN=IGKV3-20 PE=1 SV=2	39	3	8	3	36	2.11	1.08	0.330883	57.58	1.00063e+06	3.31505e+06	199384	460700	1.31108e+06	3.4227e+06	1.19196e+06	3.31505e+06
P06312	Immunoglobulin kappa variable 4-1 OS=Homo sapiens OX=9606 GN=IGKV4-1 PE=1 SV=1	7	1	1	1	2.18	2.072	1.05	0.348403	39	317235	657431			208461	536220	307388	848010
A0A0B4J231	Immunoglobulin lambda-like polypeptide 5 OS=Homo sapiens OX=9606 GN=IGLL5 PE=1 SV=1	38	6	132	1	484.97	1.807	0.85	0.475583	41.89	2.68277e+06	4.84902e+06	380320	1.23518e+06	2.68462e+06	3.955e+06	2.58646e+06	5.29779e+06
P14902	Indoleamine 2,3-dioxygenase 1 OS=Homo sapiens OX=9606 GN=IDO1 PE=1 SV=1	5	1	7	1	15.79	2.537	1.34	0.187596	48.81	1.04929e+06	2.6617e+06		483104		2.17096e+06	2.24475e+06	883058
O15327	Inositol polyphosphate 4-phosphatase type II OS=Homo sapiens OX=9606 GN=INPP4B PE=1 SV=4	3	1	1	1	2.92	2.945	1.56	0.105021	0	30760.2	90589.4		14162.3			57475.5
Q68E01	Integrator complex subunit 3 OS=Homo sapiens OX=9606 GN=INTS3 PE=1 SV=1	3	2	3	2	8.57	1.881	0.91	0.435031	37.51	267071	502415			175498	526366	248162
P08648	Integrin alpha-5 OS=Homo sapiens OX=9606 GN=ITGA5 PE=1 SV=2	2	1	1	1	2.12	1.619	0.69	0.588275	83.37	462035	747892			303612	953009	207365	747892
P19823	Inter-alpha-trypsin inhibitor heavy chain H2 OS=Homo sapiens OX=9606 GN=ITIH2 PE=1 SV=2	43	28	210	28	762	1.577	0.66	0.618247	59.13	8.08728e+07	1.24018e+08	8.28988e+06	3.72348e+07	7.60686e+07	1.01153e+08	6.56479e+07	1.4197e+08
A0A087WW43	Inter-alpha-trypsin inhibitor heavy chain H3 OS=Homo sapiens OX=9606 GN=ITIH3 PE=1 SV=1	6	2	5	2	18.1	1.598	0.68	0.601267	63.26	98424.7	181403		29829.5	98254.6	218011	58708	181403
F8WAB6	Interleukin-1 receptor-associated kinase 1 OS=Homo sapiens OX=9606 GN=IRAK1 PE=1 SV=1	11	2	4	2	8.71	1.612	0.69	0.588811	22.99	140086	108580	12376.2	156570				108580
Q8NEV9	Interleukin-27 subunit alpha OS=Homo sapiens OX=9606 GN=IL27 PE=1 SV=2	7	1	12	1	21.67	1.625	0.7	0.582708	68.61	1.13364e+06	1.84183e+06	134566	521941	1.27315e+06	2.24455e+06	1.07291e+06	1.84183e+06
F8W7U0	Intersectin-1 OS=Homo sapiens OX=9606 GN=ITSN1 PE=1 SV=1	2	2	2	2	3.73	2.14	1.1	0.319844	35.06	889543	1.90333e+06	190778			1.55241e+06	922021	2.8324e+06
P29622	Kallistatin OS=Homo sapiens OX=9606 GN=SERPINA4 PE=1 SV=3	5	2	4	2	10.65	1.757	0.81	0.494175	54.56	180480	370409		70275.3	140231	309663	109750	370409
E5RJI5	Kappa-type opioid receptor OS=Homo sapiens OX=9606 GN=OPRK1 PE=4 SV=1	17	1	2	1	4.7	3.417	1.77	0.0529591	15.4	146750	501499	31472.9			368751		556288
P04264	Keratin, type II cytoskeletal 1 OS=Homo sapiens OX=9606 GN=KRT1 PE=1 SV=6	42	14	37	13	139.19	1.543	0.63	0.64176	41.58	7.22489e+06	1.29762e+07	1.43601e+06	3.32642e+06	7.0886e+06	1.05838e+07	5.93462e+06	1.31015e+07
P35908	Keratin, type II cytoskeletal 2 epidermal OS=Homo sapiens OX=9606 GN=KRT2 PE=1 SV=2	10	4	11	3	35.73	1.632	0.71	0.578643	91	198528	1.10003e+06	37455	91404.6	250252	984281	152309	1.10003e+06
Q8N6L1	Keratinocyte-associated protein 2 OS=Homo sapiens OX=9606 GN=KRTCAP2 PE=1 SV=2	35	2	2	2	5.88	1.96	0.97	0.399747	37.18	300407	638101	57646.7	138311	574435	520454	467265	526840
Q2M1P5	Kinesin-like protein KIF7 OS=Homo sapiens OX=9606 GN=KIF7 PE=1 SV=2	3	3	4	3	8.61	1.616	0.69	0.588811	39.26	1.01151e+07	16350288	1.43432e+06	4657130	9040884	16744116	9747615	16350288
A0A0A0MSA0	Laminin subunit alpha-3 OS=Homo sapiens OX=9606 GN=LAMA3 PE=1 SV=1	1	2	2	2	5.34	1.943	0.96	0.404622	60.16	1.51741e+06	2.94833e+06	42085.8	698631	1.67797e+06	2.35848e+06	2.17837e+06	2.94833e+06
O95447	Lebercilin-like protein OS=Homo sapiens OX=9606 GN=LCA5L PE=1 SV=1	3	1	1	1	2.56	1.571	0.65	0.623455	0.38	250125	392915	53643.4				248655	393918
Q32MZ4	Leucine-rich repeat flightless-interacting protein 1 OS=Homo sapiens OX=9606 GN=LRRFIP1 PE=1 SV=2	3	2	2	2	3.74	1.612	0.69	0.588811	22.99	275684	108580	12376.2	606378				108580
Q8N1G4	Leucine-rich repeat-containing protein 47 OS=Homo sapiens OX=9606 GN=LRRC47 PE=1 SV=1	3	1	1	1	2.09	1.948	0.96	0.404622	43.91	1.56014e+06	3038821	211033	718308	1.69082e+06	3097198	1.57617e+06	3038821
Q15648	Mediator of RNA polymerase II transcription subunit 1 OS=Homo sapiens OX=9606 GN=MED1 PE=1 SV=4	3	3	3	3	6.89	1.535	0.62	0.648046	66.84	689248	791062		179220	801966	1.52044e+06	380939	791062
E7EVA0	Microtubule-associated protein OS=Homo sapiens OX=9606 GN=MAP4 PE=1 SV=1	2	3	6	3	16.09	1.653	0.72	0.565178	27.97	649940	3.93944e+06	132364	299240	504499	3.64812e+06	2.49943e+06	1.26888e+06
Q5JXC2	Migration and invasion-inhibitory protein OS=Homo sapiens OX=9606 GN=MIIP PE=1 SV=3	5	1	1	1	2.54	1.535	0.62	0.648046	66.84	689248	791062		179220	801966	1.52044e+06	380939	791062
Q02978	Mitochondrial 2-oxoglutarate/malate carrier protein OS=Homo sapiens OX=9606 GN=SLC25A11 PE=1 SV=3	4	1	1	1	1.52	1.511	0.6	0.6666	0	441209	666758		203138			423032
Q8TD08	Mitogen-activated protein kinase 15 OS=Homo sapiens OX=9606 GN=MAPK15 PE=1 SV=1	12	3	3	3	7.44	1.926	0.95	0.411604	30.38	476913	975168	93037.4		344530	516186	663143	975168
O00499	Myc box-dependent-interacting protein 1 OS=Homo sapiens OX=9606 GN=BIN1 PE=1 SV=1	2	1	2	1	3.33	1.78	0.83	0.483935	71.78	1.35218e+06	2402256		356640	1.55106e+06	2.37779e+06	1260957	2402256
P12883	Myosin-7 OS=Homo sapiens OX=9606 GN=MYH7 PE=1 SV=5	3	3	4	2	9.18	2.929	1.55	0.106281	0	318847	934011			209521	761807
P35579	Myosin-9 OS=Homo sapiens OX=9606 GN=MYH9 PE=1 SV=4	4	6	7	5	14.72	1.555	0.64	0.633726	39.74	672546	1.49312e+06		229417	596500	1.24212e+06	729694	1.49312e+06
A0A096LP10	N-acetylglucosaminyldiphosphodolichol N-acetylglucosaminyltransferase (Fragment) OS=Homo sapiens OX=9606 GN=ALG13 PE=1 SV=1	13	1	1	1	2.57	4.352	2.12	0.0151888	44.45	167255	727829	26693.1	103482			461780
Q8WXH0	Nesprin-2 OS=Homo sapiens OX=9606 GN=SYNE2 PE=1 SV=3	2	5	6	5	14.92	2.453	1.29	0.210684	0	339960	833763		156521				833763
F8WEP4	Neural cell adhesion molecule L1-like protein OS=Homo sapiens OX=9606 GN=CHL1 PE=4 SV=1	37	2	6	2	14.35	2.451	1.29	0.211066	80.31	268845	658898	60815.4	113971	176663	226802	418046	1.04825e+06
Q5T321	Neurobeachin OS=Homo sapiens OX=9606 GN=NBEA PE=1 SV=2	1	2	2	2	4.23	1.96	0.97	0.399747	7.97	48568.9	95208.2	9871.57	23595.9			60406
Q04721	Neurogenic locus notch homolog protein 2 OS=Homo sapiens OX=9606 GN=NOTCH2 PE=1 SV=3	1	1	1	1	2.59	1.517	0.6	0.662742	16.17	513807	779246		236563		635576	440468	1056584
Q13470	Non-receptor tyrosine-protein kinase TNK1 OS=Homo sapiens OX=9606 GN=TNK1 PE=1 SV=3	3	1	1	1	2.13	2.482	1.31	0.202152	19.63	53047.8	131687	11377				73216.6	150274
Q5VU65	Nuclear pore membrane glycoprotein 210-like OS=Homo sapiens OX=9606 GN=NUP210L PE=2 SV=1	5	4	4	4	9.52	1.987	0.99	0.387096	37.54	36301.5	250285			23854.4		58801.1	675910
Q01804	OTU domain-containing protein 4 OS=Homo sapiens OX=9606 GN=OTUD4 PE=1 SV=4	1	1	1	1	1.87	1.511	0.6	0.6666	0	441209	666758		203138			423032
P0CW24	Paraneoplastic antigen-like protein 6A OS=Homo sapiens OX=9606 GN=PNMA6A PE=1 SV=2	5	1	15	1	41.35	1.644	0.72	0.57011	58.18	5.71676e+06	6.65879e+06	517328	2.63206e+06	4.37987e+06	8.93912e+06	3.8328e+06	6.65879e+06
Q8NEN9	PDZ domain-containing protein 8 OS=Homo sapiens OX=9606 GN=PDZD8 PE=1 SV=1	5	4	4	4	8.09	1.495	0.58	0.675096	20.69	1.18154e+06	1.78195e+06	290874	473916		1.34749e+06	1.19801e+06	1.78195e+06
O95613	Pericentrin OS=Homo sapiens OX=9606 GN=PCNT PE=1 SV=4	1	1	2	1	5.17	1.957	0.97	0.401145	0	307056	600812			201772	490041
F5GXX3	Peroxisomal targeting signal 1 receptor (Fragment) OS=Homo sapiens OX=9606 GN=PEX5 PE=1 SV=1	22	1	12	1	36.73	1.614	0.69	0.588811	83.48	1.99137e+06	4.87186e+06	1.48191e+06	411543	1.30857e+06	6.41008e+06	3.09101e+06	1442488
F8W9L8	PHD finger protein 20-like protein 1 OS=Homo sapiens OX=9606 GN=PHF20L1 PE=1 SV=1	6	2	6	2	16.79	2.537	1.34	0.187596	25.07	82862.9	210182		38151		144876		248708
Q16822	Phosphoenolpyruvate carboxykinase [GTP], mitochondrial OS=Homo sapiens OX=9606 GN=PCK2 PE=1 SV=4	4	1	3	1	5.23	1.875	0.91	0.438585	23.15	55525.7	210330			36487		56549.7	496337
P46019	Phosphorylase b kinase regulatory subunit alpha, liver isoform OS=Homo sapiens OX=9606 GN=PHKA2 PE=1 SV=1	1	2	4	2	6.19	1.555	0.64	0.633726	39.74	672546	1.18206e+06		229417	596500	964124	560751	1236980
A0A7I2V2D2	Plasma protease C1 inhibitor OS=Homo sapiens OX=9606 GN=SERPING1 PE=1 SV=1	17	6	16	6	46.17	2.018	1.01	0.373885	55.35	637375	3.6577e+06	104482	293455	1.05098e+06	3.50443e+06	1.12865e+06	3.6577e+06
P00747	Plasminogen OS=Homo sapiens OX=9606 GN=PLG PE=1 SV=2	53	31	151	31	568.71	1.911	0.93	0.417703	39.04	3.62243e+07	6.28775e+07	5.7283e+06	1.66781e+07	2.688e+07	4.84969e+07	3.98934e+07	8.22615e+07
H0YDN1	Plectin OS=Homo sapiens OX=9606 GN=PLEC PE=1 SV=9	2	3	3	3	7.03	1.599	0.68	0.601267	73.85	1.14539e+06	1.83173e+06	101913	527353	1499631	1494017	886158	2691742
P0CB38	Polyadenylate-binding protein 4-like OS=Homo sapiens OX=9606 GN=PABPC4L PE=2 SV=1	8	1	1	1	2.7	1.665	0.74	0.558411	0	265111	441520	56857.6					441520
P02760	Protein AMBP OS=Homo sapiens OX=9606 GN=AMBP PE=1 SV=1	30	11	69	11	210.25	1.668	0.74	0.558411	42.42	2.6942e+07	4.223e+07	4.21179e+06	1.24044e+07	2.28632e+07	3.44441e+07	2.20828e+07	4.53594e+07
D6RAV0	Protein CDV3 homolog (Fragment) OS=Homo sapiens OX=9606 GN=CDV3 PE=1 SV=1	14	1	3	1	6.7	3.377	1.76	0.0560777	36.87	4.10489e+06	13863659	880363	1.51352e+06	10051607	12957107	7.1173e+06	13863659
Q5T0W9	Protein FAM83B OS=Homo sapiens OX=9606 GN=FAM83B PE=1 SV=1	2	1	1	1	2.2	1.714	0.78	0.525411	0	80413.9	137814			52841.6			137814
Q02156	Protein kinase C epsilon type OS=Homo sapiens OX=9606 GN=PRKCE PE=1 SV=1	7	2	2	2	5.34	1.557	0.64	0.633042	34.72	1.27474e+07	24490306	2226372	5869066	13045974	22964786	10252404	24490306
Q9NVR5	Protein kintoun OS=Homo sapiens OX=9606 GN=DNAAF2 PE=1 SV=2	3	1	19	1	52.69	1.611	0.69	0.589279	57.54	5.71676e+06	6.92234e+06	517328	2.63206e+06	4.6143e+06	9.22756e+06	3.8328e+06	6.92234e+06
E9PSG8	Protein mono-ADP-ribosyltransferase PARP10 (Fragment) OS=Homo sapiens OX=9606 GN=PARP10 PE=1 SV=1	21	1	1	1	2.7	1.752	0.81	0.498419	5.75	15270	26754.1			10034.3	20991.3		27812.2
H7C3X0	Protein O-GlcNAcase (Fragment) OS=Homo sapiens OX=9606 GN=OGA PE=1 SV=1	8	1	2	1	5.94	1.912	0.94	0.417703	0	168533	322300		77594.6				322300
Q14690	Protein RRP5 homolog OS=Homo sapiens OX=9606 GN=PDCD11 PE=1 SV=3	3	4	6	4	12.44	2.991	1.58	0.098368	8.25	448310	1.34089e+06	96147.7	195531	731061			1.34089e+06
C9JWI5	Protein-serine O-palmitoleoyltransferase porcupine (Fragment) OS=Homo sapiens OX=9606 GN=PORCN PE=4 SV=1	39	1	1	1	0	2.157	1.11	0.312898	0	524440	1.13137e+06		241458		922776
Q9Y5G1	Protocadherin gamma-B3 OS=Homo sapiens OX=9606 GN=PCDHGB3 PE=1 SV=4	5	2	2	2	5.48	1.679	0.75	0.551623	0	456668	766814			300086		486514
A0A669KAW0	P-type phospholipid transporter OS=Homo sapiens OX=9606 GN=ATP10A PE=1 SV=1	6	2	2	2	5.17	2.497	1.32	0.197808	2.65	471051	1.17617e+06	99236		315117			1.17617e+06
A8MUH7	Putative PDZ domain-containing protein PDZK1P1 OS=Homo sapiens OX=9606 GN=PDZK1P1 PE=5 SV=2	4	1	1	1	2.87	1.653	0.72	0.565178	27.97	649940	1.21247e+06	132364	299240	504499	988929	499378	1.26888e+06
A6NGG3	Putative uncharacterized protein C9orf92 OS=Homo sapiens OX=9606 GN=C9orf92 PE=4 SV=1	29	1	3	1	7.69	2.556	1.35	0.183252	0	94114.7	240537		43331.5				240537
P30613	Pyruvate kinase PKLR OS=Homo sapiens OX=9606 GN=PKLR PE=1 SV=2	3	1	1	1	2.82	1.552	0.63	0.635165	34.87	669690	795079	94999.9	322496	440067	648491	475597	1.08738e+06
Q9Y3P9	Rab GTPase-activating protein 1 OS=Homo sapiens OX=9606 GN=RABGAP1 PE=1 SV=3	2	2	2	2	3.81	1.648	0.72	0.566757	0	55694.4	91802.6			36597.9		58245.2
Q9H2M9	Rab3 GTPase-activating protein non-catalytic subunit OS=Homo sapiens OX=9606 GN=RAB3GAP2 PE=1 SV=1	3	2	2	2	4.83	2.609	1.38	0.168445	20.31	21664.7	56528			14236.3		31287.6	64797.9
Q92546	RAB6A-GEF complex partner protein 2 OS=Homo sapiens OX=9606 GN=RGP1 PE=1 SV=1	9	1	4	1	13.83	1.551	0.63	0.63626	93.43	303456	912131		420474	66258.8	743961	140558	999655
Q9C0H5	Rho GTPase-activating protein 39 OS=Homo sapiens OX=9606 GN=ARHGAP39 PE=1 SV=2	2	1	5	1	14.24	1.547	0.63	0.639526	47.38	4.66383e+07	7.21626e+07	5.60882e+06	2.14728e+07	45039604	5.8858e+07	4.94222e+07	7.20501e+07
B0QZD3	Rho guanine nucleotide exchange factor 16 (Fragment) OS=Homo sapiens OX=9606 GN=ARHGEF16 PE=1 SV=1	18	1	1	1	2.67	2.38	1.25	0.228774	0	586888	1.39682e+06	125868				886228
Q96DR7	Rho guanine nucleotide exchange factor 26 OS=Homo sapiens OX=9606 GN=ARHGEF26 PE=1 SV=4	5	3	3	3	6.52	1.52	0.6	0.660805	60.59	1.53887e+07	2.33888e+07	1.79971e+06	7.08512e+06	16050288	19076578	11872826	32947146
Q9H4K1	RIB43A-like with coiled-coils protein 2 OS=Homo sapiens OX=9606 GN=RIBC2 PE=1 SV=2	6	2	5	2	10.65	1.504	0.59	0.672376	9.15	2.86659e+06	4.31246e+06		1.31981e+06		3741264	2572353
P56182	Ribosomal RNA processing protein 1 homolog A OS=Homo sapiens OX=9606 GN=RRP1 PE=1 SV=1	2	1	1	1	2.2	2.096	1.07	0.336938	70.6	662486	1.38852e+06		305016		1.79365e+06	556241
Q14692	Ribosome biogenesis protein BMS1 homolog OS=Homo sapiens OX=9606 GN=BMS1 PE=1 SV=1	1	1	1	1	1.97	14.058	3.81	2.67622e-06	4.86	45192	635322		20136.6	30685		403088
Q96MT1	RING finger protein 145 OS=Homo sapiens OX=9606 GN=RNF145 PE=2 SV=2	6	1	1	1	3.03	2.685	1.42	0.151118	0	62855.5	168769			41303.6		107077
K7ER23	RNA-binding E3 ubiquitin-protein ligase MEX3C (Fragment) OS=Homo sapiens OX=9606 GN=MEX3C PE=1 SV=1	21	1	1	1	3.01	1.808	0.85	0.475583	26.81	253870	459077	54446.7			374437	238598	639817
Q96T21	Selenocysteine insertion sequence-binding protein 2 OS=Homo sapiens OX=9606 GN=SECISBP2 PE=1 SV=2	4	1	1	1	2.84	2.525	1.34	0.190194	91.28	5874.49	14830.3		2704.68		19543.4	9409.29	5689.24
Q9H3S1	Semaphorin-4A OS=Homo sapiens OX=9606 GN=SEMA4A PE=1 SV=2	6	1	1	1	3.02	2.41	1.27	0.223031	164.94	1.50146e+06	3.61923e+06	122837		2.58644e+06		2.28087e+06	3.64366e+06
Q92854	Semaphorin-4D OS=Homo sapiens OX=9606 GN=SEMA4D PE=1 SV=1	3	1	1	1	2.06	1.686	0.75	0.547578	29.15	26527.6	44717.9			17431.8	30000.5		54366.1
A0A3B3ITQ7	Serine/threonine-protein kinase LMTK3 (Fragment) OS=Homo sapiens OX=9606 GN=LMTK3 PE=1 SV=1	11	3	5	3	11.75	1.582	0.66	0.614759	33.12	1.35245e+06	1.98036e+06	167280	622685	1.05893e+06	2.07985e+06	1.16766e+06	1.98036e+06
Q9Y5S2	Serine/threonine-protein kinase MRCK beta OS=Homo sapiens OX=9606 GN=CDC42BPB PE=1 SV=2	1	1	1	1	2.19	1.77	0.82	0.485657	30.75	896324	1.58627e+06			588993	2.10354e+06	797669	1.58627e+06
H3BPN5	Serine/threonine-protein phosphatase 4 catalytic subunit OS=Homo sapiens OX=9606 GN=PPP4C PE=1 SV=1	30	1	5	1	9.07	1.948	0.96	0.404622	43.91	1.56014e+06	3038821	211033	718308	1.69082e+06	3097198	1.57617e+06	3038821
P27169	Serum paraoxonase/arylesterase 1 OS=Homo sapiens OX=9606 GN=PON1 PE=1 SV=3	56	9	38	9	148.52	1.673	0.74	0.556401	31.63	1.09731e+07	1.55668e+07	1.11935e+06	5.05216e+06	7.97571e+06	1.62415e+07	9.87653e+06	1.54924e+07
P49458	Signal recognition particle 9 kDa protein OS=Homo sapiens OX=9606 GN=SRP9 PE=1 SV=2	36	2	2	2	4.59	1.821	0.87	0.469982	36.25	44938.7	81854.1	6494.57	20690.3	39650.9	55843.3	52683.1	81854.1
A0A7I2V588	Small glutamine-rich tetratricopeptide repeat-containing protein alpha OS=Homo sapiens OX=9606 GN=SGTA PE=1 SV=1	8	1	1	1	2.78	2.807	1.49	0.127142	44.74	117791	330638	25262.4			200308		445143
A0A3B3IRW8	Sorbin and SH3 domain-containing protein 1 (Fragment) OS=Homo sapiens OX=9606 GN=SORBS1 PE=1 SV=1	5	1	3	1	8.34	8.393	3.07	0.000202468	114.37	74927.8	508035		12586.2	134952	228436	322329	1.41213e+06
P02549	Spectrin alpha chain, erythrocytic 1 OS=Homo sapiens OX=9606 GN=SPTA1 PE=1 SV=5	1	1	2	1	5.13	1.877	0.91	0.437989	0	47252.5	88687.6		21755.6			56268.9
A0A2R8Y8C0	Sperm acrosome membrane-associated protein 6 (Fragment) OS=Homo sapiens OX=9606 GN=SPACA6 PE=4 SV=1	30	3	7	3	17.81	2.116	1.08	0.328519	0	1.78644e+06	3.77936e+06			1.17391e+06	3082563
A0A1B0GWD8	Sperm flagellar protein 2 OS=Homo sapiens OX=9606 GN=SPEF2 PE=1 SV=1	2	2	2	2	5.75	1.77	0.82	0.485657	30.75	896324	1.58627e+06			588993	2.10354e+06	797669	1.58627e+06
Q5VVP1	Spermatogenesis-associated protein 31A6 OS=Homo sapiens OX=9606 GN=SPATA31A6 PE=3 SV=1	5	2	2	2	6.44	8.636	3.11	0.000163401	57.38	293078	1.29262e+06		57723.1	450203	1.0543e+06	309527	2.19668e+06
A0A6I8PIX7	Supervillin OS=Homo sapiens OX=9606 GN=SVIL PE=1 SV=1	3	4	4	4	8.73	2.107	1.07	0.331954	5.14	94535.3	199145			62121.1	57812.3	130732	199145
Q8TAQ2	SWI/SNF complex subunit SMARCC2 OS=Homo sapiens OX=9606 GN=SMARCC2 PE=1 SV=1	2	2	3	2	5.5	1.83	0.87	0.464343	59.07	318331	582529	46288.5	216168				582529
J3QQL7	SWI/SNF-related matrix-associated actin-dependent regulator of chromatin subfamily D member 2 (Fragment) OS=Homo sapiens OX=9606 GN=SMARCD2 PE=1 SV=1	41	1	1	1	3.01	2.159	1.11	0.312898	20.51	482284	1.04125e+06		260213	270438		760443	904579
B4DFJ1	TERF1-interacting nuclear factor 2 OS=Homo sapiens OX=9606 GN=TINF2 PE=1 SV=1	7	1	2	1	6.57	1.507	0.59	0.669867	13.8	683927	1.03053e+06	146680			922392		939071
E9PKK7	Trans-3-hydroxy-L-proline dehydratase OS=Homo sapiens OX=9606 GN=L3HYPDH PE=1 SV=1	6	1	1	1	1.52	1.74	0.8	0.507067	0	49758.4	86603.4			32697.2		54946.6
Q9UJA5	tRNA (adenine(58)-N(1))-methyltransferase non-catalytic subunit TRM6 OS=Homo sapiens OX=9606 GN=TRMT6 PE=1 SV=1	12	2	8	2	20.42	1.881	0.91	0.435031	8.08	375185	705789			246542	607046	447796	622380
A0A590UJA6	t-SNARE domain-containing protein 1 (Fragment) OS=Homo sapiens OX=9606 GN=TSNARE1 PE=1 SV=1	6	1	2	1	5.96	1.892	0.92	0.428197	50.99	422511	799529	66864.8	194529	423177			799529
Q96A98	Tuberoinfundibular peptide of 39 residues OS=Homo sapiens OX=9606 GN=PTH2 PE=1 SV=1	8	1	1	1	1.53	3.222	1.69	0.0702448	0	35224.6	113506		16217.8			72015.2
Q9NS68	Tumor necrosis factor receptor superfamily member 19 OS=Homo sapiens OX=9606 GN=TNFRSF19 PE=1 SV=1	4	1	1	1	2.57	4.639	2.21	0.0105211	1.49	387422	1.7972e+06	83928.7		252037	1465847
C9JPC9	Ubiquitin carboxyl-terminal hydrolase 42 (Fragment) OS=Homo sapiens OX=9606 GN=USP42 PE=1 SV=9	5	3	6	3	15.54	1.867	0.9	0.442975	33.34	436065	814349	36884.6	200769	369678	296523	552074	814349
Q16222	UDP-N-acetylhexosamine pyrophosphorylase OS=Homo sapiens OX=9606 GN=UAP1 PE=1 SV=3	2	1	1	1	1.82	3.016	1.59	0.0951737	18.49	12465	37593.9			8190.98		27012	33195.9
K7ERI8	Uncharacterized protein OS=Homo sapiens OX=9606 PE=4 SV=1	12	1	1	1	2.8	2.899	1.54	0.110552	73.39	14130.7	40969			9285.6	53827.5	16136.3
C9JF90	UPF0415 protein C7orf25 (Fragment) OS=Homo sapiens OX=9606 GN=C7orf25 PE=1 SV=1	15	1	1	1	2.46	1.867	0.9	0.442975	33.34	436065	814349	36884.6	200769	369678	296523	552074	814349
Q7Z7G8	Vacuolar protein sorting-associated protein 13B OS=Homo sapiens OX=9606 GN=VPS13B PE=1 SV=2	0	2	2	2	3.18	1.612	0.69	0.588811	22.99	67345.9	108580	12376.2	36186.2				108580
O95180	Voltage-dependent T-type calcium channel subunit alpha-1H OS=Homo sapiens OX=9606 GN=CACNA1H PE=1 SV=4	1	1	4	1	9.49	1.77	0.82	0.485657	30.75	896324	1.58627e+06			588993	2.10354e+06	797669	1.58627e+06
E7EQI7	WASH complex subunit 5 OS=Homo sapiens OX=9606 GN=WASHC5 PE=1 SV=1	3	2	2	2	4.48	2.655	1.41	0.156736	62.18	4.72747e+06	16850002		1.32219e+06	5.11394e+06	17987318	4533655	16850002
Q8IZQ1	WD repeat and FYVE domain-containing protein 3 OS=Homo sapiens OX=9606 GN=WDFY3 PE=1 SV=2	1	3	5	3	10.85	2.812	1.49	0.126348	94.16	1.20541e+06	3389152		452473	971558	5.59224e+06	664596	3389152
O43895	Xaa-Pro aminopeptidase 2 OS=Homo sapiens OX=9606 GN=XPNPEP2 PE=1 SV=3	2	1	1	1	2.06	2.012	1.01	0.377522	15.82	51023.8	102648		26132.3	30141.1		65126
G3XAM1	Zinc finger CCHC domain-containing protein 10 OS=Homo sapiens OX=9606 GN=ZCCHC10 PE=1 SV=1	8	1	1	1	2.8	1.632	0.71	0.578643	24.01	163120	266187		75102.3		217110	141537	327282
A0A7I2YQU3	Zinc finger FYVE domain-containing protein 26 OS=Homo sapiens OX=9606 GN=ZFYVE26 PE=1 SV=1	3	3	4	3	10.51	1.712	0.78	0.525411	21.76	439644	752777			288899	704091	285877	752777
A6NFS0	Zinc finger protein 275 OS=Homo sapiens OX=9606 GN=ZNF275 PE=1 SV=1	6	1	2	1	5.11	2.929	1.55	0.106281	0	318847	934011			209521	761807
G3V191	Zinc finger protein 517 OS=Homo sapiens OX=9606 GN=ZNF517 PE=4 SV=1	36	2	2	2	4.67	1.495	0.58	0.675096	20.69	1.18154e+06	1.78195e+06	290874	473916		1.34749e+06	1.19801e+06	1.78195e+06
Protein which are more abundant in control
Accession	Description	Coverage [%]	# Peptides	# PSMs	# Unique Peptides	Score Sequest HT: Sequest HT	Abundance Ratio: (NC) / (N)	Abundance Ratio (log2): (NC) / (N)	Abundance Ratio Adj. P-Value: (NC) / (N)	Abundance Ratio Variability [%]: (NC) / (N)	Abundances (Grouped): N	Abundances (Grouped): NC	Abundance: F10: Control, N	Abundance: F11: Control, N	Abundance: F12: Control, N	Abundance: F1: Sample, NC	Abundance: F2: Sample, NC	Abundance: F3: Sample, NC
A0A669KBI7	[Histone H3]-lysine(4) N-trimethyltransferase OS=Homo sapiens OX=9606 GN=KMT2B PE=1 SV=1	3	5	5	5	11.32	0.956	-0.06	0.958202	46.29	361032	416122		190187	207349	339402	277646	325473
Q5JSS2	[Histone H3]-lysine(9) N-trimethyltransferase (Fragment) OS=Homo sapiens OX=9606 GN=SUV39H2 PE=1 SV=1	11	1	1	1	2.01	0.685	-0.54	0.916526	57.06	912175	625228	282630	419976	368735	509955	439917	419238
A0A0U1RQK4	[Protein ADP-ribosylarginine] hydrolase-like protein 1 OS=Homo sapiens OX=9606 GN=ADPRHL1 PE=1 SV=1	2	2	2	2	4.72	0.63	-0.67	0.859252	58.59	4.85655e+06	3.27057e+06	3.07999e+06	2.23601e+06	2363898	2.66758e+06	2.9802e+06	2865260
Q9P0J1	[Pyruvate dehydrogenase [acetyl-transferring]]-phosphatase 1, mitochondrial OS=Homo sapiens OX=9606 GN=PDP1 PE=1 SV=3	6	1	1	1	3.17	0.01	-6.64	4.1949e-17		542538		118352	245579
P51178	1-phosphatidylinositol 4,5-bisphosphate phosphodiesterase delta-1 OS=Homo sapiens OX=9606 GN=PLCD1 PE=1 SV=2	3	1	1	1	2.51	0.88	-0.19	0.988424	3.52	742847	653441		342016			424553	638095
Q9BRC7	1-phosphatidylinositol 4,5-bisphosphate phosphodiesterase delta-4 OS=Homo sapiens OX=9606 GN=PLCD4 PE=1 SV=1	7	2	3	2	8.22	0.782	-0.35	0.964506	74.36	367204	576351	67107	169065	493548	470089	147368	587638
A0A0D9SEK2	1-phosphatidylinositol 4,5-bisphosphate phosphodiesterase gamma-1 (Fragment) OS=Homo sapiens OX=9606 GN=PLCG1 PE=1 SV=1	7	1	1	1	2.08	0.443	-1.17	0.558411	27.57	254867	113021		143159	137278	85645.4		121649
O00231	26S proteasome non-ATPase regulatory subunit 11 OS=Homo sapiens OX=9606 GN=PSMD11 PE=1 SV=3	11	2	2	2	6.13	0.253	-1.98	0.107347	80.22	883124	223441			580318	108607	237885
O00232	26S proteasome non-ATPase regulatory subunit 12 OS=Homo sapiens OX=9606 GN=PSMD12 PE=1 SV=3	3	1	1	1	2.14	0.964	-0.05	0.958135	25.67	27640.1	26658			18162.9	18301.9		31670.2
O43242	26S proteasome non-ATPase regulatory subunit 3 OS=Homo sapiens OX=9606 GN=PSMD3 PE=1 SV=2	4	1	1	1	2.9	0.823	-0.28	0.979746	66.52	372220	269520	42102.4	171374	359414	139710		424081
Q9Y399	28S ribosomal protein S2, mitochondrial OS=Homo sapiens OX=9606 GN=MRPS2 PE=1 SV=1	9	1	1	1	2.56	0.01	-6.64	4.1949e-17		505865		108491
B7Z6T1	3',5'-cyclic-AMP phosphodiesterase OS=Homo sapiens OX=9606 GN=PDE4C PE=1 SV=1	9	1	1	1	2.34	0.908	-0.14	0.979208	21.64	325035	269278		130754	244454	280191	170847	253503
P49406	39S ribosomal protein L19, mitochondrial OS=Homo sapiens OX=9606 GN=MRPL19 PE=1 SV=2	8	1	2	1	6.03	0.563	-0.83	0.774246	0	500575	281658		230470			178701
D6RJF3	4'-phosphopantetheine phosphatase OS=Homo sapiens OX=9606 GN=PANK4 PE=1 SV=3	15	1	1	1	2.73	0.914	-0.13	0.979208	22.67	1.28795e+06	1.17669e+06	276224				869404	1.01043e+06
Q8IZH2	5'-3' exoribonuclease 1 OS=Homo sapiens OX=9606 GN=XRN1 PE=1 SV=1	2	1	1	1	3.19	0.325	-1.62	0.267483	0.62	256592	83319	55030.5	92897.1	169322	67957.5
Q9H0D6	5'-3' exoribonuclease 2 OS=Homo sapiens OX=9606 GN=XRN2 PE=1 SV=1	1	1	1	1	2.46	0.93	-0.1	0.974997	54.39	432575	402348		135813	416843		152540	673329
A0A494C1K7	5'-AMP-activated protein kinase subunit gamma-2 OS=Homo sapiens OX=9606 GN=PRKAG2 PE=1 SV=1	6	2	2	2	4.98	0.608	-0.72	0.829812	56.55	419880	255118	90050.4	332573	147083	170810	197183
P47898	5-hydroxytryptamine receptor 5A OS=Homo sapiens OX=9606 GN=HTR5A PE=2 SV=1	7	1	1	1	3.45	0.01	-6.64	4.1949e-17		670153			308546
Q6ZRQ1	5-methylcytosine rRNA methyltransferase NSUN4 OS=Homo sapiens OX=9606 GN=NSUN4 PE=2 SV=1	7	1	1	1	3.33	0.01	-6.64	4.1949e-17		281634			131727	182175
Q9H857	5'-nucleotidase domain-containing protein 2 OS=Homo sapiens OX=9606 GN=NT5DC2 PE=1 SV=1	3	1	1	1	1.55	0.696	-0.52	0.922193	24.73	844382	588034		394774	546412	966675	319796	588034
C9IZA4	7-methylguanosine phosphate-specific 5'-nucleotidase OS=Homo sapiens OX=9606 GN=NT5C3B PE=1 SV=2	14	1	1	1	1.51	0.086	-3.53	0.000176041	0	86942.3	7516.74		40029.2				7516.74
Q9NYB9	Abl interactor 2 OS=Homo sapiens OX=9606 GN=ABI2 PE=1 SV=1	3	1	1	1	2.92	0.526	-0.93	0.723493	4.13	410194	218153	87973.1	199439	261163	183023	134560
A0A7P0T8U9	Abnormal spindle-like microcephaly-associated protein OS=Homo sapiens OX=9606 GN=ASPM PE=4 SV=1	1	1	1	1	2.29	0.01	-6.64	4.1949e-17		742655		159275
O00763	Acetyl-CoA carboxylase 2 OS=Homo sapiens OX=9606 GN=ACACB PE=1 SV=3	2	2	3	2	8.12	0.312	-1.68	0.230651	50.44	1.2537e+06	390630	180078		1.23008e+06	385570		322791
A0A3B3IS55	Actin-binding LIM protein 1 OS=Homo sapiens OX=9606 GN=ABLIM1 PE=1 SV=1	1	1	1	1	1.51	0.01	-6.64	4.1949e-17		40929			18844.2
Q9H981	Actin-related protein 8 OS=Homo sapiens OX=9606 GN=ACTR8 PE=1 SV=2	5	1	1	1	2.8	0.999	0	0.946809	17.55	54372.2	54332		22175	40334.9	45494.8		52922.9
Q8N3C0	Activating signal cointegrator 1 complex subunit 3 OS=Homo sapiens OX=9606 GN=ASCC3 PE=1 SV=3	1	1	1	1	2.57	0.01	-6.64	4.1949e-17		87458.5		17670.6	85468.2	57470.7
Q53FZ2	Acyl-coenzyme A synthetase ACSM3, mitochondrial OS=Homo sapiens OX=9606 GN=ACSM3 PE=1 SV=2	2	1	1	1	1.68	0.989	-0.02	0.948329	6.01	56066.1	55430.9		24787.8	38366.7			55430.9
A0A7P0T9B9	ADAMTS-like protein 1 (Fragment) OS=Homo sapiens OX=9606 GN=ADAMTSL1 PE=4 SV=1	4	3	3	3	7.38	0.239	-2.06	0.0849649	105.7	1.15749e+06	276714		532921			340790	142555
O95996	Adenomatous polyposis coli protein 2 OS=Homo sapiens OX=9606 GN=APC2 PE=1 SV=1	1	2	2	1	3.6	0.01	-6.64	4.1949e-17		429633		41854.9	435468
F5GWI4	Adenosine deaminase OS=Homo sapiens OX=9606 GN=ADA PE=1 SV=1	5	1	1	1	2.82	0.949	-0.08	0.962732	48.67	124613	118256	53189.2	57373.1	72090.7	93847.7	75028.8	176053
Q08828	Adenylate cyclase type 1 OS=Homo sapiens OX=9606 GN=ADCY1 PE=1 SV=2	3	2	2	2	4.35	0.01	-6.64	4.1949e-17		677154		130643	346574
Q96PE1	Adhesion G protein-coupled receptor A2 OS=Homo sapiens OX=9606 GN=ADGRA2 PE=1 SV=2	3	2	2	2	4.15	0.847	-0.24	0.991012	73.02	957211	810345	399217	440711	319222	660942	415935	904944
Q9H0C2	ADP/ATP translocase 4 OS=Homo sapiens OX=9606 GN=SLC25A31 PE=1 SV=1	10	1	1	1	3.23	0.108	-3.22	0.000868194	115.36	1.78581e+07	1.08013e+06	10506239	8.22207e+06	3014488	641136	3.34258e+06	1.08013e+06
P10109	Adrenodoxin, mitochondrial OS=Homo sapiens OX=9606 GN=FDX1 PE=1 SV=1	21	2	2	2	4.12	0.321	-1.64	0.255822	33.64	166555	53432.1		76683.7		34801.1	42453.2
P43652	Afamin OS=Homo sapiens OX=9606 GN=AFM PE=1 SV=1	10	4	15	4	46.71	0.778	-0.36	0.962553	54.83	1.55309e+06	1.38479e+06	398610	715060	750257	1.15819e+06	674048	1.38479e+06
A0A7P0T939	A-kinase anchor protein 9 OS=Homo sapiens OX=9606 GN=AKAP9 PE=4 SV=1	2	4	4	4	9.23	0.01	-6.64	4.1949e-17		1.52557e+06			1.0548e+06	667547
P02768	Albumin OS=Homo sapiens OX=9606 GN=ALB PE=1 SV=2	90	101	5774	101	22213.7	0.842	-0.25	0.988424	59.18	1.04987e+10	8.25035e+09	2.74764e+09	4.83371e+09	6.31732e+09	6.72923e+09	5.64781e+09	8.1024e+09
Q06278	Aldehyde oxidase OS=Homo sapiens OX=9606 GN=AOX1 PE=1 SV=2	1	1	1	1	1.5	0.746	-0.42	0.946809	31.08	117333	87514.5	24287.1		79885.2	34956.1	70296.8	87514.5
A0A087WZ31	alpha-1,2-Mannosidase OS=Homo sapiens OX=9606 GN=MAN1C1 PE=1 SV=1	7	1	1	1	2.58	0.489	-1.03	0.666202	52.55	1.39818e+06	683362	309230	624239		797154		477807
Q9UBM8	Alpha-1,3-mannosyl-glycoprotein 4-beta-N-acetylglucosaminyltransferase C OS=Homo sapiens OX=9606 GN=MGAT4C PE=2 SV=2	5	1	1	1	2.3	0.311	-1.68	0.229508	4.79	366498	114024	130310	168740	233050	93001.1
Q3V5L5	Alpha-1,6-mannosylglycoprotein 6-beta-N-acetylglucosaminyltransferase B OS=Homo sapiens OX=9606 GN=MGAT5B PE=1 SV=2	4	2	3	2	6.64	0.878	-0.19	0.988424	21.88	495232	434871		265369	279614	366030	267363
P02763	Alpha-1-acid glycoprotein 1 OS=Homo sapiens OX=9606 GN=ORM1 PE=1 SV=1	39	7	26	6	86.12	0.961	-0.06	0.958135	44.92	2.24028e+07	1.81426e+07	4.08977e+06	1.03145e+07	1.5851e+07	2.08998e+07	1.09423e+07	1.81426e+07
P02765	Alpha-2-HS-glycoprotein OS=Homo sapiens OX=9606 GN=AHSG PE=1 SV=2	50	12	107	12	420.9	0.895	-0.16	0.981966	46.78	4.61496e+07	3.56435e+07	1.13975e+07	2.12478e+07	2.41359e+07	2.71142e+07	2.31735e+07	3.56435e+07
A0A1B0GVH5	Alpha-ketoglutarate-dependent dioxygenase FTO OS=Homo sapiens OX=9606 GN=FTO PE=1 SV=1	6	2	2	2	4.22	0.292	-1.78	0.187596	83.88	282191	82349.3			185434	28603	120313	82349.3
Q16706	Alpha-mannosidase 2 OS=Homo sapiens OX=9606 GN=MAN2A1 PE=1 SV=2	2	1	1	1	2.65	0.742	-0.43	0.946809	1.31	163851	121614		76107.6	106724		77159.3
Q8TCU4	Alstrom syndrome protein 1 OS=Homo sapiens OX=9606 GN=ALMS1 PE=1 SV=4	2	3	3	3	8.87	0.698	-0.52	0.922193	28.13	3.95822e+06	2.76217e+06	848908	1.47661e+06	3382923	2679801	1.43106e+06	2.76217e+06
D6RE15	Amidophosphoribosyltransferase OS=Homo sapiens OX=9606 GN=PPAT PE=1 SV=1	38	1	1	1	2.8	0.633	-0.66	0.861767	8.78	2.00234e+06	1.2666e+06	661907	885087	1.31578e+06	1.0981e+06	803607	1234135
A0A2R8Y740	Amino acid transporter OS=Homo sapiens OX=9606 GN=SLC1A2 PE=1 SV=1	5	2	3	2	5.44	0.444	-1.17	0.558411	43.93	836236	431569	208409	385013	306491	271547	273814	998292
Q8N6M6	Aminopeptidase O OS=Homo sapiens OX=9606 GN=AOPEP PE=2 SV=2	1	1	3	1	5.64	0.573	-0.8	0.783583	3.55	2.06663e+06	1.18517e+06		951500		966657	770392	1.03155e+06
E9PIR5	AMP deaminase 3 OS=Homo sapiens OX=9606 GN=AMPD3 PE=1 SV=1	8	1	3	1	6.23	0.69	-0.54	0.920673	17.62	262259	423137		105727	196820	345123	102451	569735
Q7Z5R6	Amyloid beta A4 precursor protein-binding family B member 1-interacting protein OS=Homo sapiens OX=9606 GN=APBB1IP PE=1 SV=1	5	1	1	1	0	0.635	-0.65	0.864266	30.65	2.13548e+06	1.14015e+06	457989	997114	870417	929943	939568	841497
A0A075B7G8	Amyloid-beta A4 precursor protein-binding family B member 1 OS=Homo sapiens OX=9606 GN=APBB1 PE=1 SV=7	2	1	1	1	2.04	0.01	-6.64	4.1949e-17		951772			438207
P05067	Amyloid-beta precursor protein OS=Homo sapiens OX=9606 GN=APP PE=1 SV=3	3	1	2	1	5.2	0.606	-0.72	0.827779	22.49	385037	233260		147968	303131	227857	123571
Q9UJX6	Anaphase-promoting complex subunit 2 OS=Homo sapiens OX=9606 GN=ANAPC2 PE=1 SV=1	2	1	1	1	2.34	0.363	-1.46	0.365586	50.4	473254	171819	141707	156064				171819
Q8IY63	Angiomotin-like protein 1 OS=Homo sapiens OX=9606 GN=AMOTL1 PE=1 SV=1	1	1	1	1	1.69	0.01	-6.64	4.1949e-17		493787		77596.4		442836
C9JRP1	Anion exchange protein (Fragment) OS=Homo sapiens OX=9606 GN=SLC4A7 PE=1 SV=1	2	1	1	1	2.54	0.01	-6.64	4.1949e-17		699617		314592		219270
H7C0V5	ANKHD1-EIF4EBP3 readthrough (Fragment) OS=Homo sapiens OX=9606 GN=ANKHD1-EIF4EBP3 PE=4 SV=1	4	1	1	1	2.8	0.577	-0.79	0.793467	11.94	395253	228097	155452	167319	259729	186043
Q495B1	Ankyrin repeat and death domain-containing protein 1A OS=Homo sapiens OX=9606 GN=ANKDD1A PE=2 SV=2	3	1	1	1	2.42	0.01	-6.64	4.1949e-17		838483				550985
Q96DX5	Ankyrin repeat and SOCS box protein 9 OS=Homo sapiens OX=9606 GN=ASB9 PE=1 SV=1	16	2	2	2	5.16	0.877	-0.19	0.988424	60.1	48417.7	42445.5		17982.3	39441.5	21348.2		68832.8
R4GNB3	Ankyrin repeat domain-containing protein 18B (Fragment) OS=Homo sapiens OX=9606 GN=ANKRD18B PE=4 SV=1	7	1	1	1	2.01	0.01	-6.64	4.1949e-17		3.35419e+06			1.54431e+06
A0A590UK20	Ankyrin repeat domain-containing protein 30B OS=Homo sapiens OX=9606 GN=ANKRD30B PE=4 SV=1	3	2	2	2	5.7	0.564	-0.83	0.778393	48.5	136601	77096	29296.3	124355	60399.5	62881.8
D6RJB7	Ankyrin repeat domain-containing protein 31 OS=Homo sapiens OX=9606 GN=ANKRD31 PE=4 SV=2	2	2	2	2	4.84	0.624	-0.68	0.855088	15.19	497772	318852	112708	217076		275324	202299	143236
A0A5F9ZHN5	Ankyrin-2 OS=Homo sapiens OX=9606 GN=ANK2 PE=1 SV=1	2	4	4	4	8.43	0.822	-0.28	0.979208	40.6	732085	407261	74744.5	337060	766193	332175	370514	326382
F5GXT3	Anoctamin OS=Homo sapiens OX=9606 GN=ANO2 PE=1 SV=2	1	2	2	2	3.25	0.521	-0.94	0.720682	1.9	926390	482200		426521		388328	305937	853826
Q75V66	Anoctamin-5 OS=Homo sapiens OX=9606 GN=ANO5 PE=2 SV=1	4	1	1	1	3.32	0.605	-0.73	0.826779	34.9	6.22962e+06	3.74227e+06	1.33605e+06	2.06363e+06	5.02479e+06	3.05231e+06	2.93332e+06	2.86514e+06
E9PGG2	Anomalous homeobox protein OS=Homo sapiens OX=9606 GN=ANHX PE=2 SV=1	11	2	2	2	4.39	0.549	-0.87	0.746002	28.01	549671	301631		203317	449597	210657		352265
Q8N7J2	APC membrane recruitment protein 2 OS=Homo sapiens OX=9606 GN=AMER2 PE=1 SV=3	7	2	2	2	5.04	0.385	-1.38	0.412941	32.51	480905	185155		228010	306870	120722	146954
V9GYM3	Apolipoprotein A-II OS=Homo sapiens OX=9606 GN=APOA2 PE=1 SV=1	50	6	130	6	472.24	0.866	-0.21	0.995247	34.26	3.70105e+07	3.24847e+07	1.23538e+07	1.704e+07	2.38628e+07	2.64955e+07	1.97901e+07	3.65339e+07
A0A4V7I447	Apolipoprotein B receptor OS=Homo sapiens OX=9606 GN=APOBR PE=1 SV=1	4	2	2	2	4.92	0.923	-0.12	0.979208	26.38	1.64061e+08	132432848	36130424	64124872	107808056	170753152	81553104	132432848
P04114	Apolipoprotein B-100 OS=Homo sapiens OX=9606 GN=APOB PE=1 SV=2	16	43	74	43	251.26	0.872	-0.2	0.993009	70.64	3.36776e+06	5.89482e+06	50600	1.55055e+06	1.47324e+07	4.80799e+06	1.73436e+06	2.06066e+07
P02655	Apolipoprotein C-II OS=Homo sapiens OX=9606 GN=APOC2 PE=1 SV=1	35	3	12	3	44.18	0.98	-0.03	0.953569	62.72	2.42814e+06	2.11809e+06	477497	1.14543e+06	1.59558e+06	1220984	1.73233e+06	2.11809e+06
P02656	Apolipoprotein C-III OS=Homo sapiens OX=9606 GN=APOC3 PE=1 SV=1	41	5	32	5	124.25	0.927	-0.11	0.977631	40.76	1.53746e+07	1.27453e+07	3.55706e+06	7.07865e+06	7.53748e+06	7.68384e+06	8.78617e+06	1.27453e+07
C9JF17	Apolipoprotein D (Fragment) OS=Homo sapiens OX=9606 GN=APOD PE=1 SV=1	20	3	6	3	15.91	0.937	-0.09	0.971356	50.51	1.34082e+06	803880	429287	617330	505600	655669	221399	921293
A0A087WWY0	Apolipoprotein(a) OS=Homo sapiens OX=9606 GN=LPA PE=1 SV=1	11	1	3	1	9.75	0.711	-0.49	0.931198	41.91	261493	173787		104956	197108	123282	110261	322272
A0A6Q8PF87	Apoptosis-inducing factor 1, mitochondrial OS=Homo sapiens OX=9606 GN=AIFM1 PE=1 SV=1	6	1	1	1	2.31	0.837	-0.26	0.987497	17.21	3.15226e+06	2.63917e+06	785228	1.45134e+06	1.78265e+06	2152584	1.61557e+06	2.98574e+06
Q96NN9	Apoptosis-inducing factor 3 OS=Homo sapiens OX=9606 GN=AIFM3 PE=1 SV=1	6	2	4	2	11.68	0.01	-6.64	4.1949e-17		1.5325e+06				1.00704e+06
H0YH15	Aquarius homolog (Mouse), isoform CRA_a OS=Homo sapiens OX=9606 GN=AQR PE=1 SV=1	3	1	1	1	2.13	0.488	-1.03	0.664417	16.5	493187	240757			324083	176705	206349	240757
A0A5F9ZHM8	Argininosuccinate lyase (Fragment) OS=Homo sapiens OX=9606 GN=ASL PE=1 SV=1	7	1	1	1	2.65	0.683	-0.55	0.914855	35.97	1.02083e+06	697345	218934	355984	758884	695340	157883	697345
H0YGQ5	Armadillo repeat-containing protein 6 (Fragment) OS=Homo sapiens OX=9606 GN=ARMC6 PE=1 SV=1	4	1	1	1	1.99	0.998	0	0.946809	24.2	102406	102185			67293.2	98055.4		86855.2
Q5H9R4	Armadillo repeat-containing X-linked protein 4 OS=Homo sapiens OX=9606 GN=ARMCX4 PE=1 SV=3	2	3	4	3	8.91	0.919	-0.12	0.979208	25.72	8.18951e+06	7.52238e+06	1455508		6493914		5.19954e+06	6904797
A0A669KB07	Aryl hydrocarbon receptor nuclear translocator-like protein 1 OS=Homo sapiens OX=9606 GN=ARNTL PE=4 SV=1	36	1	38	1	92.87	0.729	-0.46	0.946809	41.34	6.02525e+06	4.39236e+06	1.29222e+06	2.29507e+06	4.83354e+06	4.96783e+06	417633	4.39236e+06
P54793	Arylsulfatase F OS=Homo sapiens OX=9606 GN=ARSF PE=1 SV=4	3	1	1	1	2.96	0.67	-0.58	0.899409	38.42	581319	389385	233512	250867	381996	317594	242062	525572
Q9BVC5	Ashwin OS=Homo sapiens OX=9606 GN=C2orf49 PE=1 SV=1	10	1	1	1	2.65	0.492	-1.02	0.67432	63.35	245584	84708.6	52932.6	54259.7	161378	69090.9	48459.2	121506
Q2M3G0	ATP-binding cassette sub-family B member 5 OS=Homo sapiens OX=9606 GN=ABCB5 PE=1 SV=4	2	3	3	3	6	0.782	-0.36	0.96444	11.85	754784	554581		410781	419592	407169		616096
Q96J66	ATP-binding cassette sub-family C member 11 OS=Homo sapiens OX=9606 GN=ABCC11 PE=1 SV=1	3	1	1	1	2.94	0.92	-0.12	0.979208	32.2	581983	535188		267952		217156	339556	683676
A0A2R8Y605	ATP-binding cassette sub-family C member 8 OS=Homo sapiens OX=9606 GN=ABCC8 PE=4 SV=1	7	1	1	1	2.67	0.506	-0.98	0.68923	17.99	343213	173529		178358	199814			173529
Q9NUQ8	ATP-binding cassette sub-family F member 3 OS=Homo sapiens OX=9606 GN=ABCF3 PE=1 SV=2	2	1	1	1	2.55	0.648	-0.63	0.8714	20.08	522887	338876	94510.3	240743	390135		215004
O94761	ATP-dependent DNA helicase Q4 OS=Homo sapiens OX=9606 GN=RECQL4 PE=1 SV=2	2	2	3	2	6.17	0.959	-0.06	0.958135	7.46	403524	386861			265164	300067		406804
Q96BY7	Autophagy-related protein 2 homolog B OS=Homo sapiens OX=9606 GN=ATG2B PE=1 SV=5	1	1	1	1	2.49	0.564	-0.83	0.776452	78.24	1.30176e+06	733629	279184			178738	985546	733629
A0A0G2JNC7	Baculoviral IAP repeat-containing protein 1 OS=Homo sapiens OX=9606 GN=NAIP PE=1 SV=1	3	1	2	1	4.17	0.855	-0.23	0.995247	0	199851	170809		92013.9				170809
Q9P281	BAH and coiled-coil domain-containing protein 1 OS=Homo sapiens OX=9606 GN=BAHCC1 PE=1 SV=4	3	4	4	3	9.27	0.01	-6.64	4.1949e-17		127376		20207.7	79279.6
H3BV46	BAI1-associated protein 3 (Fragment) OS=Homo sapiens OX=9606 GN=BAIAP3 PE=1 SV=1	21	2	2	2	4.49	0.882	-0.18	0.987808	43.09	64288.5	56717.2		43739.2	28588.2		49590.5	41156.4
A0A1B0GTW6	Band 4.1-like protein 1 OS=Homo sapiens OX=9606 GN=EPB41L1 PE=1 SV=2	4	3	4	3	8.12	0.01	-6.64	4.1949e-17		584196			268970
Q8N3I7	Bardet-Biedl syndrome 5 protein OS=Homo sapiens OX=9606 GN=BBS5 PE=1 SV=1	5	1	1	1	2.26	0.571	-0.81	0.781002	72.72	933442	575898		257649	1.02314e+06	336571	436958	575898
C9JFN4	Basic leucine zipper and W2 domain-containing protein 1 (Fragment) OS=Homo sapiens OX=9606 GN=BZW1 PE=1 SV=1	13	1	1	1	2.63	0.01	-6.64	4.1949e-17		1.04944e+06		132016	548196	689605
Q16620	BDNF/NT-3 growth factors receptor OS=Homo sapiens OX=9606 GN=NTRK2 PE=1 SV=1	7	2	2	2	5.45	0.796	-0.33	0.976498	77.28	591540	470961			388713	802403	164869	470961
P02749	Beta-2-glycoprotein 1 OS=Homo sapiens OX=9606 GN=APOH PE=1 SV=3	34	8	31	8	119.64	0.949	-0.08	0.962732	40.45	8.41426e+06	1.05086e+07	2.98726e+06	3.87402e+06	4.79929e+06	8.5711e+06	7463956	9.31951e+06
A0A2R8YEI5	Beta-chimaerin OS=Homo sapiens OX=9606 GN=CHN2 PE=4 SV=1	5	1	1	1	2.52	0.632	-0.66	0.861767	41.68	488591	309024	161686	224953	223435	350630	154934	309024
Q9H1M3	Beta-defensin 129 OS=Homo sapiens OX=9606 GN=DEFB129 PE=1 SV=1	24	1	1	1	3.02	0.725	-0.46	0.942546	37.88	614561	445551			403840	282231		573697
Q13057	Bifunctional coenzyme A synthase OS=Homo sapiens OX=9606 GN=COASY PE=1 SV=4	2	1	4	1	9.17	0.61	-0.71	0.834723	1.96	873612	532898			574068		342614	525882
Q96GS4	BLOC-1-related complex subunit 6 OS=Homo sapiens OX=9606 GN=BORCS6 PE=1 SV=2	7	2	2	2	4.55	0.594	-0.75	0.810846	93.31	1.56491e+06	614552	80151	776068	1.02833e+06	501247	635297	599706
P13497	Bone morphogenetic protein 1 OS=Homo sapiens OX=9606 GN=BMP1 PE=1 SV=2	2	1	1	1	3.06	0.917	-0.12	0.979208	22.29	412768	378671		199947	257804	361558		323474
P12645	Bone morphogenetic protein 3 OS=Homo sapiens OX=9606 GN=BMP3 PE=1 SV=2	6	2	2	1	4.68	0.886	-0.18	0.98553	59.53	2.2932e+07	2.1715e+07	3.76718e+06	13783966		17711388	20538410	9435355
P18075	Bone morphogenetic protein 7 OS=Homo sapiens OX=9606 GN=BMP7 PE=1 SV=1	6	1	1	1	2.79	0.832	-0.27	0.984661	0	1.66636e+06	1.3865e+06	357380					1.3865e+06
J3KNN7	BRCA1-associated protein OS=Homo sapiens OX=9606 GN=BRAP PE=1 SV=1	10	2	2	2	4.69	0.757	-0.4	0.953672	9.22	5.41248e+06	4.09747e+06	1.33283e+06	2.49197e+06	3.33552e+06	3220261	2826875	4.09747e+06
A0A2R8Y4C2	Breast cancer anti-estrogen resistance protein 1 OS=Homo sapiens OX=9606 GN=BCAR1 PE=1 SV=1	5	3	8	3	18.4	0.743	-0.43	0.946809	13.1	6.2146e+06	4.4192e+06	1.33283e+06	2.63509e+06	4.26242e+06	3220261	2826875	4.4192e+06
Q5TH69	Brefeldin A-inhibited guanine nucleotide-exchange protein 3 OS=Homo sapiens OX=9606 GN=ARFGEF3 PE=1 SV=3	2	3	12	3	30.07	0.71	-0.49	0.930603	60.52	544228	566150	88310.8		472665	461769	956970	295337
Q2TAL6	Brorin OS=Homo sapiens OX=9606 GN=VWC2 PE=1 SV=1	3	1	2	1	3.14	0.764	-0.39	0.958001	6.11	511280	390701		225896	350107		247885
Q9BX70	BTB/POZ domain-containing protein 2 OS=Homo sapiens OX=9606 GN=BTBD2 PE=1 SV=1	5	2	2	2	3.69	0.01	-6.64	4.1949e-17		801159			511488	379659
F5H7I0	BTB/POZ domain-containing protein KCTD6 (Fragment) OS=Homo sapiens OX=9606 GN=KCTD6 PE=1 SV=1	31	1	1	1	2.56	0.823	-0.28	0.980037	24.28	203758	167659	45761.2	89585.8		117630	106373	259154
F8W7D1	C3 and PZP-like alpha-2-macroglobulin domain-containing protein 8 OS=Homo sapiens OX=9606 GN=CPAMD8 PE=1 SV=1	11	2	3	2	4.74	0.319	-1.65	0.249123	99.47	712132	226839	421302		169642	103619		405033
Q9UJ99	Cadherin-22 OS=Homo sapiens OX=9606 GN=CDH22 PE=2 SV=2	3	1	4	1	10.83	0.01	-6.64	4.1949e-17		111116			49325.6	75730.3
Q86UP0	Cadherin-24 OS=Homo sapiens OX=9606 GN=CDH24 PE=1 SV=1	2	1	1	1	2.51	0.699	-0.52	0.92263	33.71	152422	106608	26091.7	87922.5			67638.7
Q96Q77	Calcium and integrin-binding family member 3 OS=Homo sapiens OX=9606 GN=CIB3 PE=1 SV=3	13	1	1	1	3.41	0.754	-0.41	0.953569	4.3	2.70516e+06	2.04062e+06			1.77762e+06		1.2577e+06	2.10065e+06
Q14123	Calcium/calmodulin-dependent 3',5'-cyclic nucleotide phosphodiesterase 1C OS=Homo sapiens OX=9606 GN=PDE1C PE=1 SV=1	15	5	5	5	12.22	0.494	-1.02	0.675096	30.08	467507	167384	100265	123651	376044	112738	106199	515290
I3L4E1	Calcium-binding and coiled-coil domain-containing protein 2 OS=Homo sapiens OX=9606 GN=CALCOCO2 PE=1 SV=1	17	2	3	2	5.3	0.01	-6.64	4.1949e-17		283658		42376.3	130599	406659
P48539	Calmodulin regulator protein PCP4 OS=Homo sapiens OX=9606 GN=PCP4 PE=1 SV=3	37	2	2	2	3.3	0.548	-0.87	0.744723	13.52	571178	312900		262977		255211	218451	264153
A0A669KB11	Calpain-3 (Fragment) OS=Homo sapiens OX=9606 GN=CAPN3 PE=1 SV=1	27	1	1	1	2.51	0.633	-0.66	0.861849	16.06	579665	366831	110810	266884	485730	291426	238948
Q9Y6Q1	Calpain-6 OS=Homo sapiens OX=9606 GN=CAPN6 PE=1 SV=2	1	1	1	1	1.53	0.01	-6.64	4.1949e-17		102049		33473.3	30720
Q9C010	cAMP-dependent protein kinase inhibitor beta OS=Homo sapiens OX=9606 GN=PKIB PE=1 SV=1	26	1	2	1	4.04	0.728	-0.46	0.945969	15.45	1.23422e+06	893877	288987	289713	811030		595657	851070
F6T4W9	CapZ-interacting protein (Fragment) OS=Homo sapiens OX=9606 GN=RCSD1 PE=1 SV=1	10	1	1	1	2.28	0.962	-0.06	0.958135	53.12	856093	823571	106085	394155	780058	805264	522524	741532
A8MTM1	Carbonyl reductase [NADPH] 1 OS=Homo sapiens OX=9606 GN=CBR1 PE=1 SV=1	18	1	1	1	3.17	0.01	-6.64	4.1949e-17		266156		92658.4	75490.9
Q9H078	Caseinolytic peptidase B protein homolog OS=Homo sapiens OX=9606 GN=CLPB PE=1 SV=1	7	2	10	2	28.45	0.814	-0.3	0.979208	34.91	1.82594e+06	1.48648e+06		750002	1.34493e+06	894578	943117	2.25721e+06
Q5SW23	Catenin alpha-3 (Fragment) OS=Homo sapiens OX=9606 GN=CTNNA3 PE=1 SV=1	6	1	1	1	2.1	0.351	-1.51	0.332349	25.37	707937	248666		325943		576165	134717	248666
E9PIE3	Caveolae-associated protein 3 OS=Homo sapiens OX=9606 GN=CAVIN3 PE=1 SV=1	6	1	1	1	2.03	0.01	-6.64	4.1949e-17		1.09851e+06		309838	384577
P49715	CCAAT/enhancer-binding protein alpha OS=Homo sapiens OX=9606 GN=CEBPA PE=1 SV=3	3	1	1	1	1.54	0.646	-0.63	0.8714	6.42	424319	274215		195362		214177	181680
A5YKK6	CCR4-NOT transcription complex subunit 1 OS=Homo sapiens OX=9606 GN=CNOT1 PE=1 SV=2	1	1	1	1	2.03	0.01	-6.64	4.1949e-17		48746.2		8988.89		37254.7
Q9ULM6	CCR4-NOT transcription complex subunit 6 OS=Homo sapiens OX=9606 GN=CNOT6 PE=1 SV=2	3	1	1	1	2.32	0.339	-1.56	0.306185	1.23	1.20602e+06	408685		555266		333336	346612	405320
O43866	CD5 antigen-like OS=Homo sapiens OX=9606 GN=CD5L PE=1 SV=1	19	4	17	4	70.7	0.992	-0.01	0.946809	24.68	3.63427e+06	3.90311e+06	649397	1.67326e+06	2.41561e+06	2.66608e+06	2.47637e+06	4.29068e+06
Q15642	Cdc42-interacting protein 4 OS=Homo sapiens OX=9606 GN=TRIP10 PE=1 SV=3	4	1	1	1	2.7	0.252	-1.99	0.105626	22.9	795681	193503		341071	561596	264207	114056	193503
Q13042	Cell division cycle protein 16 homolog OS=Homo sapiens OX=9606 GN=CDC16 PE=1 SV=2	6	1	1	1	3.48	0.861	-0.22	0.99968	0.23	140443	120859		64661.7		98576.1	76800.8	112676
J3KMY0	Cell division cycle-associated protein 3 OS=Homo sapiens OX=9606 GN=CDCA3 PE=1 SV=1	7	1	3	1	8.11	0.661	-0.6	0.885259	15.06	875787	578962	201479	403222	295124	428664	371004	578962
Q9BWT1	Cell division cycle-associated protein 7 OS=Homo sapiens OX=9606 GN=CDCA7 PE=1 SV=1	6	1	1	1	2.59	0.708	-0.5	0.930603	35.55	1.1808e+06	836587			775925	682345	189413	1.10048e+06
Q9Y592	Centrosomal protein of 83 kDa OS=Homo sapiens OX=9606 GN=CEP83 PE=1 SV=3	12	4	4	4	10.22	0.536	-0.9	0.729182	54.05	564562	270328	282083	187049	370985	226348	58103.9	270328
Q96GE4	Centrosomal protein of 95 kDa OS=Homo sapiens OX=9606 GN=CEP95 PE=1 SV=1	5	2	2	2	5.31	0.275	-1.86	0.151132	123.1	5.02223e+06	402068	1.42e+06	2.31229e+06	801414	74813.4	1.5354e+06	402068
A0A7I2V4M7	Centrosome and spindle pole-associated protein 1 (Fragment) OS=Homo sapiens OX=9606 GN=CSPP1 PE=1 SV=1	4	1	1	1	2.93	0.648	-0.63	0.8714	0	366522	237606			240849	193799
Q5VT06	Centrosome-associated protein 350 OS=Homo sapiens OX=9606 GN=CEP350 PE=1 SV=1	1	2	2	2	5.53	0.699	-0.52	0.922453	18.97	2.39424e+07	1.67377e+07	5005849		16138476		12104358	14684342
Q96MC4	CEP295 N-terminal-like protein OS=Homo sapiens OX=9606 GN=CEP295NL PE=2 SV=1	4	1	5	1	14.59	0.669	-0.58	0.899409	59.94	7.29706e+06	4.63101e+06	585499	3.85069e+06	4795046	3777192	3552040	3067801
A0A2R8Y773	Ceramide transfer protein (Fragment) OS=Homo sapiens OX=9606 GN=CERT1 PE=1 SV=1	33	1	1	1	3.03	0.38	-1.4	0.404622	57.81	452420	171885	97029.2			54416.6	178764	171885
Q9UFW8	CGG triplet repeat-binding protein 1 OS=Homo sapiens OX=9606 GN=CGGBP1 PE=1 SV=2	12	1	1	1	3.37	0.654	-0.61	0.875531	44.65	648678	424295	231675	298659	297900		269199
A0A6Q8PFF9	Charged multivesicular body protein 1a OS=Homo sapiens OX=9606 GN=CHMP1A PE=1 SV=1	9	2	2	2	4.21	0.826	-0.28	0.981966	66.86	742424	613328	81559.1		952439	798730		384131
Q6NUI6	Chondroadherin-like protein OS=Homo sapiens OX=9606 GN=CHADL PE=1 SV=2	3	2	2	2	3.82	0.69	-0.54	0.920673	17.62	262259	180980		105727	196820		102451	202837
K7EJF1	Chromatin assembly factor 1 subunit A (Fragment) OS=Homo sapiens OX=9606 GN=CHAF1A PE=1 SV=1	16	2	2	2	3.29	0.01	-6.64	4.1949e-17		94521.1				62111.7
O95931	Chromobox protein homolog 7 OS=Homo sapiens OX=9606 GN=CBX7 PE=1 SV=1	7	1	1	1	2.2	0.184	-2.44	0.0232241	0	4.31878e+06	793802			2.83796e+06	647449
I3L229	Chromodomain-helicase-DNA-binding protein 3 (Fragment) OS=Homo sapiens OX=9606 GN=CHD3 PE=1 SV=8	5	1	1	1	1.75	0.01	-6.64	4.1949e-17		3.35419e+06			1.54431e+06
Q96G28	Cilia- and flagella-associated protein 36 OS=Homo sapiens OX=9606 GN=CFAP36 PE=1 SV=2	6	1	1	1	2.19	0.01	-6.64	4.1949e-17		542381		116323
Q6ZU64	Cilia- and flagella-associated protein 65 OS=Homo sapiens OX=9606 GN=CFAP65 PE=1 SV=2	1	1	2	1	4.36	0.668	-0.58	0.899409	35.47	477148	318908	102332	272222	224519	256473	205204
A0A494BZW6	Ciliogenesis and planar polarity effector 1 OS=Homo sapiens OX=9606 GN=CPLANE1 PE=1 SV=2	1	1	1	1	2.26	0.53	-0.92	0.727206	6.94	1.02007e+06	558523	314462	469652	668025	455548	327812	777416
K7EQQ1	Cleft lip and palate transmembrane protein 1 (Fragment) OS=Homo sapiens OX=9606 GN=CLPTM1 PE=1 SV=1	6	1	1	1	1.92	0.781	-0.36	0.963869	60.92	559249	436691		275296	343717	605986	122760	436691
Q8N2M8	CLK4-associating serine/arginine rich protein OS=Homo sapiens OX=9606 GN=CLASRP PE=1 SV=4	1	1	2	1	3.19	0.939	-0.09	0.970526	27.58	713114	669783	259740	277640	468602	546295	522077	644907
A0A494C0R8	Clustered mitochondria protein homolog OS=Homo sapiens OX=9606 GN=CLUH PE=1 SV=1	4	2	2	2	4.79	0.303	-1.72	0.214936	0	231343	70189			152020			70189
Q8WVM7	Cohesin subunit SA-1 OS=Homo sapiens OX=9606 GN=STAG1 PE=1 SV=3	2	2	2	2	3.87	0.816	-0.29	0.979208	27.95	668162	545387	180798	249642	439063		346027
Q494R4	Coiled-coil domain-containing protein 153 OS=Homo sapiens OX=9606 GN=CCDC153 PE=1 SV=2	11	1	2	1	5.22	0.01	-6.64	4.1949e-17		804648		145986	437931
Q9NQR7	Coiled-coil domain-containing protein 177 OS=Homo sapiens OX=9606 GN=CCDC177 PE=2 SV=3	6	1	1	1	3.66	0.87	-0.2	0.995138	77.93	1.56446e+06	1.35896e+06	120775	720294	1.72113e+06	727683	862211	2.27875e+06
A0A6E1Y6F7	Coiled-coil domain-containing protein 180 OS=Homo sapiens OX=9606 GN=CCDC180 PE=1 SV=1	3	4	5	4	11.25	0.858	-0.22	0.998006	65.72	1.50818e+06	2.94249e+06	323454	1.48995e+06	762076	3.17538e+06	1.8669e+06	1.93907e+06
O60826	Coiled-coil domain-containing protein 22 OS=Homo sapiens OX=9606 GN=CCDC22 PE=1 SV=1	2	1	1	1	2.09	0.93	-0.1	0.974997	54.39	432575	402348		135813	416843		152540	673329
Q4G0X9	Coiled-coil domain-containing protein 40 OS=Homo sapiens OX=9606 GN=CCDC40 PE=1 SV=2	3	1	1	1	2.51	0.484	-1.05	0.653675	36.01	569134	275177	157999	187455	373989		182934	262625
Q2M329	Coiled-coil domain-containing protein 96 OS=Homo sapiens OX=9606 GN=CCDC96 PE=1 SV=2	5	2	2	2	4.29	0.553	-0.85	0.756142	0	695171	384448		320065				384448
A0A384DVK4	Coiled-coil domain-containing protein R3HCC1L OS=Homo sapiens OX=9606 GN=R3HCC1L PE=1 SV=1	4	1	1	1	2.57	0.763	-0.39	0.957396	61.43	123649	94346.9		37169.8	124447		63472	88977.2
P02452	Collagen alpha-1(I) chain OS=Homo sapiens OX=9606 GN=COL1A1 PE=1 SV=5	6	3	3	3	7.77	0.652	-0.62	0.875485	16.86	341000	222225	65109.5		251693		144384	217007
P02458	Collagen alpha-1(II) chain OS=Homo sapiens OX=9606 GN=COL2A1 PE=1 SV=3	3	2	2	2	5.19	0.905	-0.14	0.979208	19.31	634593	574368		292174		317032	364415	660376
P02461	Collagen alpha-1(III) chain OS=Homo sapiens OX=9606 GN=COL3A1 PE=1 SV=4	9	8	9	8	20.46	0.824	-0.28	0.980972	42.5	652924	282436	78622.7	347860	429050	230363	308456	226206
P20908	Collagen alpha-1(V) chain OS=Homo sapiens OX=9606 GN=COL5A1 PE=1 SV=3	1	2	2	2	3.79	0.522	-0.94	0.721414	6.22	142118	593594			93388.9	484153	148531	654836
Q02388	Collagen alpha-1(VII) chain OS=Homo sapiens OX=9606 GN=COL7A1 PE=1 SV=2	3	5	6	5	13.18	0.495	-1.01	0.675096	0	999922	494823	214450				313946
A0A087X0K0	Collagen alpha-1(XV) chain OS=Homo sapiens OX=9606 GN=COL15A1 PE=1 SV=1	5	3	3	3	7.48	0.407	-1.3	0.47257	64.95	1.76831e+06	720457	545377	814150	969941	431814	1271500	720457
Q8NFW1	Collagen alpha-1(XXII) chain OS=Homo sapiens OX=9606 GN=COL22A1 PE=2 SV=2	1	1	1	1	2.31	0.972	-0.04	0.957396	15.89	978598	951627	233570	404854		776175
Q17RW2	Collagen alpha-1(XXIV) chain OS=Homo sapiens OX=9606 GN=COL24A1 PE=1 SV=2	3	2	3	2	6.82	0.587	-0.77	0.807131	43.43	543551	319017	161172		258342		227769	283490
E9PNV9	Collagen alpha-1(XXV) chain OS=Homo sapiens OX=9606 GN=COL25A1 PE=1 SV=1	7	1	1	1	2.99	0.481	-1.05	0.648046	11.79	357894	172320			235179	83326.2	118778	172320
Q8IZC6	Collagen alpha-1(XXVII) chain OS=Homo sapiens OX=9606 GN=COL27A1 PE=2 SV=1	2	1	3	1	8.8	0.01	-6.64	4.1949e-17		932695		269633	318576
A0A087WTA8	Collagen alpha-2(I) chain OS=Homo sapiens OX=9606 GN=COL1A2 PE=1 SV=1	7	5	5	5	10.28	0.69	-0.54	0.920673	17.62	262259	180980		105727	196820		102451	202837
A0A087WYX9	Collagen alpha-2(V) chain OS=Homo sapiens OX=9606 GN=COL5A2 PE=1 SV=1	6	3	3	3	6.66	0.569	-0.81	0.779823	20.6	778219	521425	274657		310756	217826	330824	706105
P25067	Collagen alpha-2(VIII) chain OS=Homo sapiens OX=9606 GN=COL8A2 PE=1 SV=2	6	2	3	2	8.28	0.807	-0.31	0.979208	7.88	507371	409628		246345	316153			409628
A0A140T9N1	Collagen alpha-2(XI) chain OS=Homo sapiens OX=9606 GN=COL11A2 PE=1 SV=1	5	3	3	3	7.7	0.572	-0.8	0.78165	21.11	373608	213860		151703	278374	204844		182108
P25940	Collagen alpha-3(V) chain OS=Homo sapiens OX=9606 GN=COL5A3 PE=1 SV=3	3	3	6	3	15.52	0.905	-0.14	0.979208	19.31	634593	942673		292174		317032	691737	942673
A6NMZ7	Collagen alpha-6(VI) chain OS=Homo sapiens OX=9606 GN=COL6A6 PE=1 SV=2	1	1	1	1	2.38	0.418	-1.26	0.48753	69.36	437274	183583	73992.3	256948	287342	89389.6	195108
B1AMR4	Collybistin OS=Homo sapiens OX=9606 GN=ARHGEF9 PE=1 SV=2	3	1	1	1	2.04	0.536	-0.9	0.729182	26.65	971211	520499	208293	527545	287504		330237
M0R0Q9	Complement C3 (Fragment) OS=Homo sapiens OX=9606 GN=C3 PE=1 SV=1	79	7	195	1	652.26	0.605	-0.73	0.827254	1.75	468787	283600			308049	231313	166866	286979
P07360	Complement component C8 gamma chain OS=Homo sapiens OX=9606 GN=C8G PE=1 SV=3	19	2	3	2	9.05	0.813	-0.3	0.979208	0	437281	355490		201329		289948
F5GY05	Constitutive coactivator of peroxisome proliferator-activated receptor gamma OS=Homo sapiens OX=9606 GN=FAM120B PE=1 SV=1	3	1	1	1	2.64	0.856	-0.22	0.995534	0	1.15322e+06	986963			757802	804997
A0A494C0Y9	Constitutive coactivator of PPAR-gamma-like protein 1 (Fragment) OS=Homo sapiens OX=9606 GN=FAM120A PE=1 SV=1	10	1	1	1	3.33	0.944	-0.08	0.96479	11.01	713272	673429		310247	496128	594140		622570
Q8IWV2	Contactin-4 OS=Homo sapiens OX=9606 GN=CNTN4 PE=1 SV=1	1	1	15	1	25.82	0.519	-0.95	0.715422	38.82	9.01857e+06	4.67801e+06	202018	4.87368e+06	5.92628e+06	3.81553e+06	3.08704e+06	3.70739e+06
Q8IYJ1	Copine-9 OS=Homo sapiens OX=9606 GN=CPNE9 PE=1 SV=3	6	2	2	2	4.5	0.754	-0.41	0.953569	26.99	642084	484324		355526	350836		381840	389760
Q53SF7	Cordon-bleu protein-like 1 OS=Homo sapiens OX=9606 GN=COBLL1 PE=1 SV=3	2	1	1	1	2.58	0.01	-6.64	4.1949e-17		1.52834e+06		171374		1.92087e+06
H0YDQ8	CREB-regulated transcription coactivator 2 (Fragment) OS=Homo sapiens OX=9606 GN=CRTC2 PE=1 SV=2	2	1	1	1	1.61	0.612	-0.71	0.836705	65.15	588751	360279	82209.8	416339			230150	357826
Q5QGZ9	C-type lectin domain family 12 member A OS=Homo sapiens OX=9606 GN=CLEC12A PE=1 SV=3	10	1	2	1	5.52	0.327	-1.61	0.273426	38.66	3.36088e+06	1.09867e+06		1.62398e+06	2.10433e+06	683842	913443
Q86T13	C-type lectin domain family 14 member A OS=Homo sapiens OX=9606 GN=CLEC14A PE=1 SV=1	5	1	1	1	2.82	0.327	-1.61	0.272483	32.36	1.15416e+06	376863	307376	427923			239105
Q9UJ71	C-type lectin domain family 4 member K OS=Homo sapiens OX=9606 GN=CD207 PE=1 SV=2	9	2	2	2	4.64	0.713	-0.49	0.933028	73.97	52285.9	37287.3		25976.1	31841	18167.2		62420.4
E7EME3	C-type mannose receptor 2 OS=Homo sapiens OX=9606 GN=MRC2 PE=1 SV=1	7	1	2	1	2.66	0.571	-0.81	0.781002	39.01	529410	302397		243747		319927		233130
Q14999	Cullin-7 OS=Homo sapiens OX=9606 GN=CUL7 PE=1 SV=2	4	2	2	2	5.34	0.957	-0.06	0.958135	22.05	336975	332130	59932.4	198397	221433		245450	285139
E9PEK8	Cyclic AMP-dependent transcription factor ATF-2 OS=Homo sapiens OX=9606 GN=ATF2 PE=1 SV=1	8	1	2	1	5.01	0.142	-2.81	0.00536935	0	567348	80666.2	121677				51179.7
A0A2R8YGD3	Cyclic nucleotide ras GEF OS=Homo sapiens OX=9606 GN=RAPGEF2 PE=1 SV=1	3	2	5	2	13.96	0.994	-0.01	0.946809	36.27	3.54448e+06	3.9242e+06	705106	1.63192e+06	3.87059e+06	3.80327e+06	2.48975e+06	3.26713e+06
P78396	Cyclin-A1 OS=Homo sapiens OX=9606 GN=CCNA1 PE=1 SV=1	3	1	1	1	2.65	0.999	0	0.946809	42.99	1.29895e+06	1.29732e+06	247180	598053	923403	1.4902e+06	823103	827305
Q9NYV4	Cyclin-dependent kinase 12 OS=Homo sapiens OX=9606 GN=CDK12 PE=1 SV=2	1	1	3	1	6.65	0.448	-1.16	0.565178	61.69	938867	420513	330029	432265	323827	342983	356580	378022
C9J1C1	Cysteine protease (Fragment) OS=Homo sapiens OX=9606 GN=ATG4B PE=1 SV=1	35	2	2	2	5.31	0.01	-6.64	4.1949e-17		206090		27888	94886.3	315742
Q9P021	Cysteine-rich PDZ-binding protein OS=Homo sapiens OX=9606 GN=CRIPT PE=1 SV=1	10	1	2	1	3.3	0.529	-0.92	0.727206	12.71	168118	88860.5		71054	120346	72477.3
O14957	Cytochrome b-c1 complex subunit 10 OS=Homo sapiens OX=9606 GN=UQCR11 PE=1 SV=1	50	1	1	1	2.54	0.438	-1.19	0.545394	17.84	593455	259774	111964	318068	389972		164817
Q96KJ9	Cytochrome c oxidase subunit 4 isoform 2, mitochondrial OS=Homo sapiens OX=9606 GN=COX4I2 PE=1 SV=2	12	1	1	1	2.76	0.646	-0.63	0.8714	57.3	153163	98947.4	19967.6	148131	100646	70435.6		113373
Q8NCM8	Cytoplasmic dynein 2 heavy chain 1 OS=Homo sapiens OX=9606 GN=DYNC2H1 PE=1 SV=4	2	5	5	5	12.78	0.817	-0.29	0.979208	20.94	54504.9	44515.5			35816.2	36308.2	24748.3	97316.3
Q8WWK9	Cytoskeleton-associated protein 2 OS=Homo sapiens OX=9606 GN=CKAP2 PE=1 SV=1	4	2	2	2	5.43	0.698	-0.52	0.922193	32.65	562545	392906	139657	259002	336693	320465	319674	192429
P28838	Cytosol aminopeptidase OS=Homo sapiens OX=9606 GN=LAP3 PE=1 SV=3	4	1	2	1	5.51	0.107	-3.23	0.00083623	108.03	3.7598e+06	402068	1.07732e+06	1.73106e+06	801414	74813.4	1.25612e+06	402068
Q5U5Z8	Cytosolic carboxypeptidase 2 OS=Homo sapiens OX=9606 GN=AGBL2 PE=1 SV=2	3	2	2	2	3.79	0.341	-1.55	0.311343	86.77	2.33583e+06	796811	851871	1075441	636583		505547
H0YLQ1	DDB1- and CUL4-associated factor 11 (Fragment) OS=Homo sapiens OX=9606 GN=DCAF11 PE=1 SV=1	77	1	6	1	12.95	0.415	-1.27	0.483935	131.31	1.6469e+06	352410	423360	103914	1.08221e+06	166516	520233	352410
H0YNC2	Dehydrogenase/reductase (SDR family) member 1, isoform CRA_b OS=Homo sapiens OX=9606 GN=DHRS1 PE=1 SV=1	12	1	1	1	2.14	0.684	-0.55	0.916526	0	496618	339922		228649		277250
E9PQU6	DENN domain-containing protein 2B (Fragment) OS=Homo sapiens OX=9606 GN=DENND2B PE=1 SV=1	15	1	1	1	2.09	0.01	-6.64	4.1949e-17		29055			15349.6	16639.3
Q68D51	DENN domain-containing protein 2C OS=Homo sapiens OX=9606 GN=DENND2C PE=1 SV=2	4	2	2	2	4.73	0.655	-0.61	0.876607	62.86	461064	224848	13366.2	212279	389955	156758	142657	422956
P81605	Dermcidin OS=Homo sapiens OX=9606 GN=DCD PE=1 SV=2	10	1	1	1	2.24	0.01	-6.64	4.1949e-17		708271		400406	123710
Q9Y2H0	Disks large-associated protein 4 OS=Homo sapiens OX=9606 GN=DLGAP4 PE=1 SV=3	3	1	2	1	5.42	0.407	-1.3	0.47257	94.41	739745	301094	289114		266747			301094
K7ESN5	Distal membrane-arm assembly complex protein 2 (Fragment) OS=Homo sapiens OX=9606 GN=DMAC2 PE=1 SV=1	27	2	3	2	5.25	0.939	-0.09	0.970526	27.58	713114	669783	259740	277640	468602	546295	522077	644907
Q0P6D2	Divergent protein kinase domain 1C OS=Homo sapiens OX=9606 GN=DIPK1C PE=2 SV=3	4	1	1	1	2.16	0.385	-1.38	0.41252	0	719298	276794			472665	225761
F5H269	DmX-like protein 1 OS=Homo sapiens OX=9606 GN=DMXL1 PE=1 SV=1	2	3	3	3	7.27	0.01	-6.64	4.1949e-17		319204		68458.7
K7EJL0	DNA (cytosine-5)-methyltransferase 1 (Fragment) OS=Homo sapiens OX=9606 GN=DNMT1 PE=1 SV=1	18	3	4	3	8.46	0.815	-0.3	0.979208	50.02	101374	82592.2	29076.8	46673.7	42522.9			82592.2
K7EK97	DNA excision repair protein ERCC-1 (Fragment) OS=Homo sapiens OX=9606 GN=ERCC1 PE=1 SV=1	11	1	1	1	2.14	0.842	-0.25	0.988424	23.34	939684	772742		504271	529775	630272	630158	629827
K7ERT1	DNA fragmentation factor subunit alpha OS=Homo sapiens OX=9606 GN=DFFA PE=1 SV=1	26	2	3	2	9.32	0.969	-0.05	0.957396	29.3	7.7251e+06	7.48598e+06	1.32933e+06	3.55672e+06	7.4606e+06	7.90947e+06	4.66885e+06	7.48598e+06
Q9NXL9	DNA helicase MCM9 OS=Homo sapiens OX=9606 GN=MCM9 PE=1 SV=4	1	1	1	1	2.04	0.266	-1.91	0.133309	0	760687	202587			499863			202587
B1AHB1	DNA helicase OS=Homo sapiens OX=9606 GN=MCM5 PE=1 SV=1	4	2	2	2	3.75	0.529	-0.92	0.727206	12.71	168118	88860.5		71054	120346	72477.3
F5GZ28	DNA ligase OS=Homo sapiens OX=9606 GN=LIG1 PE=1 SV=1	2	1	1	1	2.09	0.01	-6.64	4.1949e-17		282577		54412.5		206814
G3V419	DNA mismatch repair protein Mlh3 OS=Homo sapiens OX=9606 GN=MLH3 PE=1 SV=1	2	2	2	2	4.37	0.593	-0.75	0.810846	39.73	715858	424739	144673		499196	458673		320800
F8WAX8	DNA mismatch repair protein Msh6 OS=Homo sapiens OX=9606 GN=MSH6 PE=1 SV=1	18	1	1	1	2.69	0.928	-0.11	0.976498	39.07	362574	359037	60727	166933	347014		172598	473857
Q9Y253	DNA polymerase eta OS=Homo sapiens OX=9606 GN=POLH PE=1 SV=1	2	1	1	1	2.09	0.724	-0.47	0.942546	46.11	541650	392377			355929		338129	288889
F5H8D7	DNA repair protein XRCC1 OS=Homo sapiens OX=9606 GN=XRCC1 PE=1 SV=2	6	2	2	2	5.13	0.834	-0.26	0.984772	41.09	490446	404457	65984.5	225807	529890	740948	256613	319833
Q9BRX5	DNA replication complex GINS protein PSF3 OS=Homo sapiens OX=9606 GN=GINS3 PE=1 SV=1	16	1	1	1	3.65	0.323	-1.63	0.26351	140.79	1.08621e+06	351247	542470	214763			222853
A0A087WXL3	DNA-directed DNA polymerase OS=Homo sapiens OX=9606 GN=POLQ PE=1 SV=1	2	2	2	2	4.63	0.72	-0.47	0.940107	30.37	3.8351e+06	2.72858e+06	822502	1.62923e+06	2.67063e+06		2.11702e+06	2.23127e+06
H8Y6P7	DNA-directed RNA polymerase II subunit GRINL1A OS=Homo sapiens OX=9606 GN=GCOM1 PE=2 SV=1	6	3	4	3	10.18	0.975	-0.04	0.955073	24.46	321100	302846		126117	247342	215860	192144	370385
Q9NW08	DNA-directed RNA polymerase III subunit RPC2 OS=Homo sapiens OX=9606 GN=POLR3B PE=1 SV=2	4	2	3	2	4.9	0.107	-3.23	0.00083623	108.03	3.7598e+06	402068	1.07732e+06	1.73106e+06	801414	74813.4	1.25612e+06	402068
Q9BUI4	DNA-directed RNA polymerase III subunit RPC3 OS=Homo sapiens OX=9606 GN=POLR3C PE=1 SV=1	11	2	2	2	5.73	0.311	-1.69	0.228933	50.88	907419	282068	163194	498218			266612	189336
B9ZVN9	DNA-directed RNA polymerase subunit OS=Homo sapiens OX=9606 GN=POLR1A PE=1 SV=1	3	2	3	2	8.57	0.698	-0.52	0.922193	21.64	644218	524159	138163	546401	417232	474234		472526
A0A2R8Y4Q0	DnaJ homolog subfamily C member 21 OS=Homo sapiens OX=9606 GN=DNAJC21 PE=1 SV=1	2	1	1	1	2.02	0.726	-0.46	0.942546	46.08	744691	540390		342864			465611	397921
Q9Y5R6	Doublesex- and mab-3-related transcription factor 1 OS=Homo sapiens OX=9606 GN=DMRT1 PE=1 SV=2	17	2	3	2	9.44	0.479	-1.06	0.64176	22.99	413769	198310		163244	317299	161747
Q9NQL9	Doublesex- and mab-3-related transcription factor 3 OS=Homo sapiens OX=9606 GN=DMRT3 PE=1 SV=1	6	1	1	1	2.71	0.01	-6.64	4.1949e-17		1.15292e+06			642072	626339
Q9NR20	Dual specificity tyrosine-phosphorylation-regulated kinase 4 OS=Homo sapiens OX=9606 GN=DYRK4 PE=1 SV=2	7	3	4	3	7.59	0.946	-0.08	0.96444	43.65	375634	355240			246837	289744	128251	503493
J3QLE2	Dual-specificity mitogen-activated protein kinase kinase 4 OS=Homo sapiens OX=9606 GN=MAP2K4 PE=4 SV=1	100	1	1	1	3.16	0.01	-6.64	4.1949e-17		895399			1.0656e+06	227631
H7C389	Dynein axonemal assembly factor 10 (Fragment) OS=Homo sapiens OX=9606 GN=DNAAF10 PE=1 SV=1	23	1	1	1	2.12	0.21	-2.25	0.046556	0	906325	190736		417282			121015
Q9P2D7	Dynein axonemal heavy chain 1 OS=Homo sapiens OX=9606 GN=DNAH1 PE=2 SV=5	1	4	5	4	11.44	0.818	-0.29	0.979208	49.95	1.64283e+06	737482	1.20148e+06		316575	321374	875770
Q0VDD8	Dynein axonemal heavy chain 14 OS=Homo sapiens OX=9606 GN=DNAH14 PE=2 SV=3	1	1	1	1	3.34	0.545	-0.88	0.740632	46.41	475415	258867	64398	346561		138898	249664
Q9UFH2	Dynein axonemal heavy chain 17 OS=Homo sapiens OX=9606 GN=DNAH17 PE=1 SV=3	2	5	5	5	11.7	0.545	-0.87	0.74092	10.28	350470	191132	80553.9		214893		121266
Q8TE73	Dynein axonemal heavy chain 5 OS=Homo sapiens OX=9606 GN=DNAH5 PE=1 SV=3	1	2	2	2	4.99	0.495	-1.01	0.675096	49.23	921329	456135		424190		515546	208842
Q8WXX0	Dynein axonemal heavy chain 7 OS=Homo sapiens OX=9606 GN=DNAH7 PE=1 SV=2	1	3	3	3	7.12	0.825	-0.28	0.981966	19.08	401679	331364			263951	270270	307186	293587
A0A669KB38	Dynein heavy chain 10, axonemal OS=Homo sapiens OX=9606 GN=DNAH10 PE=1 SV=1	1	4	5	4	9.93	0.635	-0.66	0.862765	16.37	921260	602476	156808		762784	650278	382248	497234
A0A3B3IT12	Dynein regulatory complex protein 1 (Fragment) OS=Homo sapiens OX=9606 GN=DRC1 PE=1 SV=1	3	1	1	1	1.5	0.766	-0.38	0.958135	0	1.28638e+06	985629	275886			803908
Q5JU01	Dynein regulatory complex subunit 5 OS=Homo sapiens OX=9606 GN=TCTE1 PE=1 SV=1	16	2	3	2	5.64	0.868	-0.2	0.995247	3.02	203239	180554	43588.1	91272.7	139115	526045	114554	174230
E9PH99	E3 SUMO-protein ligase ZNF451 OS=Homo sapiens OX=9606 GN=ZNF451 PE=1 SV=1	4	3	3	3	6.42	0.561	-0.84	0.770635	40.68	456778	270135	118442	210306	276331	165593	228043
A0A0U1RQX8	E3 ubiquitin-protein ligase CBL OS=Homo sapiens OX=9606 GN=CBL PE=1 SV=1	4	2	24	2	62.31	0.485	-1.04	0.656332	39.95	9.28325e+07	3.72894e+07	2.07612e+07	4.27412e+07	4.80541e+07	2.8931e+07	4.31801e+07	3.72894e+07
Q75N03	E3 ubiquitin-protein ligase Hakai OS=Homo sapiens OX=9606 GN=CBLL1 PE=1 SV=1	11	3	5	3	10.95	0.413	-1.28	0.483935	123.74	1.99067e+06	500431	240390		2.32321e+06	230672	317504	1.43736e+06
Q76N89	E3 ubiquitin-protein ligase HECW1 OS=Homo sapiens OX=9606 GN=HECW1 PE=1 SV=3	2	1	1	1	2.96	0.334	-1.58	0.2934	36.62	1.55628e+06	517540	413794	716532	834594	422121	621117	424831
O95714	E3 ubiquitin-protein ligase HERC2 OS=Homo sapiens OX=9606 GN=HERC2 PE=1 SV=2	1	3	4	2	10.93	0.01	-6.64	4.1949e-17		1.00867e+06				662818
Q7Z6Z7	E3 ubiquitin-protein ligase HUWE1 OS=Homo sapiens OX=9606 GN=HUWE1 PE=1 SV=3	0	1	1	1	2.61	0.757	-0.4	0.953672	49.88	677178	585533	303042	311780	422135	396501	489951	585533
Q96EQ8	E3 ubiquitin-protein ligase RNF125 OS=Homo sapiens OX=9606 GN=RNF125 PE=1 SV=4	10	1	2	1	5.12	0.808	-0.31	0.979208	5.77	782863	632933	255158	347947	514435	516239	386518	975412
A0A0A0MTC1	E3 ubiquitin-protein ligase RNF213 OS=Homo sapiens OX=9606 GN=RNF213 PE=1 SV=1	2	5	7	5	18.62	0.01	-6.64	4.1949e-17		418984			281239	188847
Q9Y577	E3 ubiquitin-protein ligase TRIM17 OS=Homo sapiens OX=9606 GN=TRIM17 PE=1 SV=1	8	2	2	2	5.43	0.601	-0.73	0.82143	27.19	888634	489812		349204	684160	345874	310767	687115
A0A6Q8PHK0	E3 ubiquitin-protein ligase TRIP12 OS=Homo sapiens OX=9606 GN=TRIP12 PE=1 SV=1	4	3	7	3	16.05	0.357	-1.49	0.348403	49.47	493912	176320		194601	379268	87774.2	111869	280436
P53804	E3 ubiquitin-protein ligase TTC3 OS=Homo sapiens OX=9606 GN=TTC3 PE=1 SV=2	1	2	3	2	6.55	0.01	-6.64	4.1949e-17		925642			426176
Q15075	Early endosome antigen 1 OS=Homo sapiens OX=9606 GN=EEA1 PE=1 SV=2	2	1	1	1	2.69	0.548	-0.87	0.745972	110.14	206739	116067	21802.2	193576		89089.8	74637.1	116067
E5RI18	EF-hand calcium-binding domain-containing protein 13 (Fragment) OS=Homo sapiens OX=9606 GN=EFCAB13 PE=4 SV=1	17	1	1	1	1.51	0.897	-0.16	0.981616	0	75086.4	67371.3	16103.6				42744.5
A0A0U1RQV3	EGF-containing fibulin-like extracellular matrix protein 1 (Fragment) OS=Homo sapiens OX=9606 GN=EFEMP1 PE=1 SV=1	5	1	2	1	4.65	0.576	-0.8	0.790059	14.68	336631	193850	72196.1	227172	207172	158110	111910	293796
D6RAD5	Electron transfer flavoprotein-ubiquinone oxidoreductase (Fragment) OS=Homo sapiens OX=9606 GN=ETFDH PE=1 SV=1	13	1	1	1	2.33	0.365	-1.46	0.369277	65.36	959406	349725			630445		340308	228028
Q2Y0W8	Electroneutral sodium bicarbonate exchanger 1 OS=Homo sapiens OX=9606 GN=SLC4A8 PE=1 SV=1	1	1	2	1	4.14	0.951	-0.07	0.961078	0	745433	709086			489839		449888
Q9GZR5	Elongation of very long chain fatty acids protein 4 OS=Homo sapiens OX=9606 GN=ELOVL4 PE=1 SV=1	5	1	1	1	2.56	0.01	-6.64	4.1949e-17		1.45133e+06		311263
Q8IYF1	Elongin-A2 OS=Homo sapiens OX=9606 GN=ELOA2 PE=1 SV=2	8	3	5	3	11.14	0.756	-0.4	0.953569	7.91	1.05449e+06	796894		460173	731065	646686	508167
A0A087WYI2	Ena/VASP-like protein OS=Homo sapiens OX=9606 GN=EVL PE=1 SV=1	8	1	1	1	2.72	0.567	-0.82	0.779334	17.68	353845	200666		183832	206061		125366	203785
H0YJZ6	Endoribonuclease Dicer OS=Homo sapiens OX=9606 GN=DICER1 PE=1 SV=2	1	1	2	1	4.12	0.694	-0.53	0.920673	42.42	75407.6	52325.7	12194.5		65716.1		33198.6
H7C2N5	Endosome/lysosome-associated apoptosis and autophagy regulator family member 2 (Fragment) OS=Homo sapiens OX=9606 GN=ELAPOR2 PE=1 SV=1	4	1	1	1	2.55	0.01	-6.64	4.1949e-17		354800		156332		113481
H7C331	Endosome-associated-trafficking regulator 1 (Fragment) OS=Homo sapiens OX=9606 GN=ENTR1 PE=1 SV=1	13	1	1	1	2.65	0.334	-1.58	0.293304	55.5	313813	104902		248041	120119		100839	69238.9
P0DPD6	Endothelin-converting enzyme 2 OS=Homo sapiens OX=9606 GN=ECE2 PE=1 SV=1	2	1	1	1	2.71	0.949	-0.08	0.962732	10.97	743908	706210	141978	342504	496522	510804	483862	706210
Q14244	Ensconsin OS=Homo sapiens OX=9606 GN=MAP7 PE=1 SV=1	3	1	1	1	2.16	0.965	-0.05	0.958135	1.47	110818	106888		51021.9			68490.1	105836
E9PBC1	Epsin-2 OS=Homo sapiens OX=9606 GN=EPN2 PE=1 SV=1	10	3	3	3	8.54	0.928	-0.11	0.977165	90.04	1.8081e+06	176893	1.4254e+06	832469	247147		532002	37317.6
Q8NBQ5	Estradiol 17-beta-dehydrogenase 11 OS=Homo sapiens OX=9606 GN=HSD17B11 PE=1 SV=3	3	1	1	1	1.57	0.01	-6.64	4.1949e-17		808105			1.0797e+06	182988
Q9BQI3	Eukaryotic translation initiation factor 2-alpha kinase 1 OS=Homo sapiens OX=9606 GN=EIF2AK1 PE=1 SV=2	1	1	2	1	3.51	0.706	-0.5	0.928286	0	939249	662785	201438					662785
Q13541	Eukaryotic translation initiation factor 4E-binding protein 1 OS=Homo sapiens OX=9606 GN=EIF4EBP1 PE=1 SV=3	10	1	1	1	1.5	0.777	-0.36	0.961078	6.34	180335	140191		84047.6	117065		85181.1	146387
A0A7I2V3D5	Eukaryotic translation initiation factor 4H OS=Homo sapiens OX=9606 GN=EIF4H PE=1 SV=1	17	1	1	1	2.03	0.472	-1.08	0.624998	1.63	732166	345808	157025				221826	342028
Q96A65	Exocyst complex component 4 OS=Homo sapiens OX=9606 GN=EXOC4 PE=1 SV=1	3	2	2	2	3.83	0.495	-1.01	0.675096	49.23	921329	456135		424190		515546	208842
O43592	Exportin-T OS=Homo sapiens OX=9606 GN=XPOT PE=1 SV=2	18	6	9	6	25.71	0.832	-0.27	0.984661	58.95	958168	772072		274650	1.01134e+06	85629.2	489851	1.04367e+06
Q86X51	EZH inhibitory protein OS=Homo sapiens OX=9606 GN=EZHIP PE=1 SV=1	2	1	1	1	1.63	0.634	-0.66	0.862765	51.24	93944.8	59603.9	18011	48385.5		33327		86945.4
P52907	F-actin-capping protein subunit alpha-1 OS=Homo sapiens OX=9606 GN=CAPZA1 PE=1 SV=3	8	1	1	1	2.25	0.504	-0.99	0.687789	5.68	1.31773e+06	664117	293444	606700	233284		421357
H0YJS3	Fanconi anemia group M protein (Fragment) OS=Homo sapiens OX=9606 GN=FANCM PE=1 SV=1	2	2	2	2	4.44	0.78	-0.36	0.962791	9.85	181691	148494	60663.7	83652.7	116818	121116	85142.8	220581
Q8TES7	Fas-binding factor 1 OS=Homo sapiens OX=9606 GN=FBF1 PE=1 SV=2	3	2	2	2	5.31	0.328	-1.61	0.276793	8.82	644961	211620	146550	264980	423817		134265
O14926	Fascin-2 OS=Homo sapiens OX=9606 GN=FSCN2 PE=1 SV=1	5	1	3	1	6.99	0.01	-6.64	4.1949e-17		467186				306997
Q6GMR7	Fatty-acid amide hydrolase 2 OS=Homo sapiens OX=9606 GN=FAAH2 PE=1 SV=1	3	1	1	1	2.07	0.937	-0.09	0.971356	23.5	312351	292543	66988.9	121011	248843	238607
M0R3E7	F-BAR domain only protein 1 (Fragment) OS=Homo sapiens OX=9606 GN=FCHO1 PE=1 SV=1	10	2	2	2	3.11	0.71	-0.49	0.930603	36.67	330295	336816	24287.1	152072	495854	34956.1	217161	336816
Q8TB52	F-box only protein 30 OS=Homo sapiens OX=9606 GN=FBXO30 PE=1 SV=3	8	3	3	3	7.65	0.705	-0.5	0.928286	45.66	110023	73981.1	15799.1	50656.1	98136.8	45172.7		98823.1
Q96AC1	Fermitin family homolog 2 OS=Homo sapiens OX=9606 GN=FERMT2 PE=1 SV=1	4	1	1	1	3.28	0.01	-6.64	4.1949e-17		2.55797e+06		548600
F6U495	Fibrillin-1 OS=Homo sapiens OX=9606 GN=FBN1 PE=1 SV=1	3	1	1	1	1.52	0.567	-0.82	0.779334	0	164187	93034			107890		59026.6
A0A1B0GWF4	Fibroblast growth factor receptor 2 OS=Homo sapiens OX=9606 GN=FGFR2 PE=4 SV=1	19	1	1	1	2.62	0.569	-0.81	0.779823	44.62	530556	301874		181582	469009			301874
A0A3B3ISD1	Fibroblast growth factor receptor OS=Homo sapiens OX=9606 GN=FGFR1 PE=1 SV=1	3	1	1	1	2.83	0.865	-0.21	0.995247	10.36	37217.8	32181	12649.6	17135.5	22747.5			32181
Q5CZC0	Fibrous sheath-interacting protein 2 OS=Homo sapiens OX=9606 GN=FSIP2 PE=2 SV=4	1	4	4	4	9.41	0.933	-0.1	0.973189	20.73	1.15057e+06	2.43961e+06	131137	725441	756064	1.98982e+06	1.76427e+06	761494
P21333	Filamin-A OS=Homo sapiens OX=9606 GN=FLNA PE=1 SV=4	3	4	4	4	9.93	0.744	-0.43	0.946809	32.56	111747	83152.1		38603.2	97867.7		39529.7	110976
Q01167	Forkhead box protein K2 OS=Homo sapiens OX=9606 GN=FOXK2 PE=1 SV=3	10	2	2	2	5.81	0.683	-0.55	0.914855	35.97	1.02083e+06	697345	218934	355984	758884	695340	157883	697345
Q96PY5	Formin-like protein 2 OS=Homo sapiens OX=9606 GN=FMNL2 PE=1 SV=3	5	3	3	3	7.16	0.648	-0.63	0.8714	20.08	522887	338876	94510.3	240743	390135		215004
Q8IVF7	Formin-like protein 3 OS=Homo sapiens OX=9606 GN=FMNL3 PE=1 SV=3	2	1	2	1	2.62	0.607	-0.72	0.829812	91.11	81001.1	65000.9	87079.4	37293.8	52663.8	39687.5	41240.6	127592
Q5H8C1	FRAS1-related extracellular matrix protein 1 OS=Homo sapiens OX=9606 GN=FREM1 PE=1 SV=3	1	1	1	1	2.21	0.44	-1.18	0.551623	7.55	421188	185471			276771	143944	161127	185471
P0C091	FRAS1-related extracellular matrix protein 3 OS=Homo sapiens OX=9606 GN=FREM3 PE=3 SV=2	1	2	2	1	3.29	0.718	-0.48	0.939496	20.19	647687	465317	131800		448560		340625	403299
O00757	Fructose-1,6-bisphosphatase isozyme 2 OS=Homo sapiens OX=9606 GN=FBP2 PE=1 SV=2	6	1	4	1	8.96	0.975	-0.04	0.954953	11.91	1.50454e+06	1.47e+06	298683	692708	1198660	1.10807e+06	1.0036e+06	1.47e+06
P98174	FYVE, RhoGEF and PH domain-containing protein 1 OS=Homo sapiens OX=9606 GN=FGD1 PE=1 SV=2	5	1	1	1	3.41	0.455	-1.14	0.582409	14.66	1.58027e+06	718699		727574		531084		793276
F8W895	G patch domain-containing protein 4 (Fragment) OS=Homo sapiens OX=9606 GN=GPATCH4 PE=1 SV=1	4	1	1	1	2.62	0.399	-1.33	0.449533	6.7	375059	149626	79321.7		249927		90679.7	156642
O96020	G1/S-specific cyclin-E2 OS=Homo sapiens OX=9606 GN=CCNE2 PE=1 SV=1	6	1	1	1	2.75	0.927	-0.11	0.977631	38.84	1.1277e+06	1.04535e+06	313384		571896		663235
A0A1W2PRC4	Gamma-aminobutyric acid receptor subunit delta OS=Homo sapiens OX=9606 GN=GABRD PE=1 SV=1	5	1	1	1	2.94	0.885	-0.18	0.98553	27.3	452465	400539		208320		400429	254127	253395
Q9UN88	Gamma-aminobutyric acid receptor subunit theta OS=Homo sapiens OX=9606 GN=GABRQ PE=1 SV=2	4	1	1	1	2.52	0.965	-0.05	0.958135	64.54	393265	671995	74288.1	181064	651761	548100	212049	680836
H3BMH3	GATOR complex protein WDR59 (Fragment) OS=Homo sapiens OX=9606 GN=WDR59 PE=1 SV=8	5	1	1	1	2.25	0.487	-1.04	0.662312	38.98	240174	120879		84552.9	206402	87704.7	76693.4	127376
D6RF35	Gc-globulin OS=Homo sapiens OX=9606 GN=GC PE=1 SV=1	49	17	104	17	417.45	0.986	-0.02	0.95123	36.25	2.62502e+07	2.5362e+07	8.59708e+06	1.20859e+07	1.52501e+07	2.00602e+07	1.68669e+07	2.5362e+07
Q96A29	GDP-fucose transporter 1 OS=Homo sapiens OX=9606 GN=SLC35C1 PE=1 SV=1	2	1	1	1	1.55	0.294	-1.77	0.193369	85.55	188828	78095.5	142141	86938.4	102461	41173		120818
B1APE2	General transcription factor TFIIB (Fragment) OS=Homo sapiens OX=9606 GN=GTF2B PE=1 SV=1	16	1	1	1	3.4	0.208	-2.26	0.0444151	69.91	1.67312e+06	338000		569350	1487534	850234	124630	338000
Q16099	Glutamate receptor ionotropic, kainate 4 OS=Homo sapiens OX=9606 GN=GRIK4 PE=2 SV=2	2	1	3	1	7.7	0.865	-0.21	0.995247	0	892524	771747			586496	629460
H7C0R3	Glutamine--tRNA ligase (Fragment) OS=Homo sapiens OX=9606 GN=QARS1 PE=1 SV=1	15	2	5	2	11.63	0.751	-0.41	0.952245	30.38	403990	1.82879e+06			265470	1.49161e+06	1.18394e+06	303305
Q86SX6	Glutaredoxin-related protein 5, mitochondrial OS=Homo sapiens OX=9606 GN=GLRX5 PE=1 SV=2	8	1	1	1	1.73	0.756	-0.4	0.953569	25.32	39534.1	29877	19796.9	18202	21541.6			29877
E7ETN1	Glutathione hydrolase 1 proenzyme (Fragment) OS=Homo sapiens OX=9606 GN=GGT1 PE=1 SV=8	43	1	1	1	3.25	0.719	-0.48	0.940107	39.47	489080	351822	231328	225178	235833		223218
J3KPJ0	Glutathione hydrolase 6 OS=Homo sapiens OX=9606 GN=GGT6 PE=1 SV=1	5	1	2	1	5.21	0.208	-2.27	0.0437724	26.64	1.37217e+06	285038	127593	631764	1.06371e+06	232486
Q8IVS8	Glycerate kinase OS=Homo sapiens OX=9606 GN=GLYCTK PE=1 SV=1	7	1	1	1	2.52	0.622	-0.69	0.849618	76.88	689262	428714	243171	192914			272002
P43304	Glycerol-3-phosphate dehydrogenase, mitochondrial OS=Homo sapiens OX=9606 GN=GPD2 PE=1 SV=3	6	1	1	1	0	0.01	-6.64	4.1949e-17		405912		103102		225218
C9JBL4	Glycine receptor subunit alpha-2 (Fragment) OS=Homo sapiens OX=9606 GN=GLRA2 PE=1 SV=1	6	1	1	1	2.21	0.833	-0.26	0.984661	32.78	2.72541e+06	2.27129e+06	584510	1.39218e+06	1.60322e+06	1852530	1.85005e+06	1.64503e+06
Q92896	Golgi apparatus protein 1 OS=Homo sapiens OX=9606 GN=GLG1 PE=1 SV=2	3	3	3	3	6.68	0.908	-0.14	0.979208	108.75	57862.6	52534.6			38022.7	21710	65785.4
Q9H4A6	Golgi phosphoprotein 3 OS=Homo sapiens OX=9606 GN=GOLPH3 PE=1 SV=1	7	2	3	2	5.92	0.484	-1.05	0.655955	57.72	387367	187611	121497	121952			119032
Q9H3P7	Golgi resident protein GCP60 OS=Homo sapiens OX=9606 GN=ACBD3 PE=1 SV=4	5	1	1	1	3.11	0.489	-1.03	0.6666	29.49	335243	164062	100265	123651	220295	112738	106199	164062
E9PCW1	Golgi SNAP receptor complex member 1 OS=Homo sapiens OX=9606 GN=GOSR1 PE=1 SV=1	13	3	4	3	7.93	0.361	-1.47	0.357627	19.31	527695	190346	99390.1	276649		155252
A0A1W2PQY5	Golgin subfamily A member 2 OS=Homo sapiens OX=9606 GN=GOLGA2 PE=1 SV=1	7	1	1	1	2.64	0.01	-6.64	4.1949e-17		52663.9		27811.3	24247.1	22908.9
H0Y6I0	Golgin subfamily A member 4 (Fragment) OS=Homo sapiens OX=9606 GN=GOLGA4 PE=1 SV=1	3	3	3	3	6.92	0.64	-0.64	0.867986	65.15	123418	78944			81100.2		76721.1	51538.2
A0A087X0T7	Golgin subfamily A member 6-like protein 10 OS=Homo sapiens OX=9606 GN=GOLGA6L10 PE=3 SV=2	7	2	14	2	32.9	0.814	-0.3	0.979208	16.38	6.4936e+06	5.47837e+06	1.96389e+06	2.98973e+06	3.93529e+06	3.97455e+06	3.47582e+06	5.6472e+06
Q14789	Golgin subfamily B member 1 OS=Homo sapiens OX=9606 GN=GOLGB1 PE=1 SV=2	1	1	1	1	2.54	0.214	-2.22	0.0505749	119.06	3.21713e+06	258565	1.12636e+06	1.48121e+06	679656	201634	713967	258565
A0A7I2V3Y5	Golgi-specific brefeldin A-resistance guanine nucleotide exchange factor 1 OS=Homo sapiens OX=9606 GN=GBF1 PE=1 SV=1	5	4	4	1	8.75	0.01	-6.64	4.1949e-17		179058				117662
A0A087WW86	GPALPP motifs-containing protein 1 OS=Homo sapiens OX=9606 GN=GPALPP1 PE=1 SV=1	15	1	1	1	2.18	0.344	-1.54	0.315329	16.67	1.37618e+06	473026	330196	566352				473026
Q75T13	GPI inositol-deacylase OS=Homo sapiens OX=9606 GN=PGAP1 PE=1 SV=1	5	2	2	2	4.49	0.357	-1.49	0.348403	49.47	493912	176320		194601	379268	87774.2	111869	280436
Q5T6X5	G-protein coupled receptor family C group 6 member A OS=Homo sapiens OX=9606 GN=GPRC6A PE=1 SV=1	5	1	1	1	3.07	0.298	-1.75	0.202152	0	1.169e+06	348116			768172	283934
Q86YR5	G-protein-signaling modulator 1 OS=Homo sapiens OX=9606 GN=GPSM1 PE=1 SV=2	4	1	1	1	3.36	0.525	-0.93	0.723493	23.89	492707	258694	90006.9		380108			258694
Q6XGZ2	Granzyme B OS=Homo sapiens OX=9606 GN=GZMB PE=1 SV=1	11	1	6	1	16.14	0.855	-0.23	0.995247	28.39	1.24593e+06	1.06548e+06	267212	468621	1.09879e+06	726664	676007	1.0766e+06
O00178	GTP-binding protein 1 OS=Homo sapiens OX=9606 GN=GTPBP1 PE=1 SV=3	14	2	2	2	6.41	0.973	-0.04	0.957396	21	106411	190062		32238.4	106265	131783	120587	224798
F8WBY6	GTP-binding protein 8 OS=Homo sapiens OX=9606 GN=GTPBP8 PE=1 SV=1	17	1	3	1	8.01	0.458	-1.13	0.588811	30.97	4.65864e+06	2.24308e+06		1.90557e+06	3.44576e+06	1.07106e+06	1.42315e+06	2.56896e+06
V9GYM8	Guanine nucleotide exchange factor H1 OS=Homo sapiens OX=9606 GN=ARHGEF2 PE=1 SV=1	4	2	2	2	5.03	0.809	-0.31	0.979208	58.12	660283	458133	141609	194986	497348		457618	290995
Q9UMX6	Guanylyl cyclase-activating protein 2 OS=Homo sapiens OX=9606 GN=GUCA1B PE=1 SV=4	11	1	1	1	2.59	0.66	-0.6	0.883766	28.53	532209	351130	114413	244453		346916		289871
A0A087WZS5	HCG15613, isoform CRA_b OS=Homo sapiens OX=9606 GN=MMP25 PE=4 SV=1	6	1	1	1	1.5	0.01	-6.64	4.1949e-17		329641		70697
Q9H583	HEAT repeat-containing protein 1 OS=Homo sapiens OX=9606 GN=HEATR1 PE=1 SV=3	2	2	3	2	7.25	0.723	-0.47	0.942546	18.88	366034	849886			240528	507918	724810	849886
Q5JX83	Heat shock 70 kDa protein 12B OS=Homo sapiens OX=9606 GN=HSPA12B PE=1 SV=2	4	1	1	1	3	0.681	-0.55	0.914855	13.05	172720	117583		75395	119711		67995.4	129007
P48723	Heat shock 70 kDa protein 13 OS=Homo sapiens OX=9606 GN=HSPA13 PE=1 SV=1	3	1	1	1	2.18	0.583	-0.78	0.802155	0	444858	259459		204818			164617
E9PMQ6	Heat shock factor protein 1 OS=Homo sapiens OX=9606 GN=HSF1 PE=1 SV=2	3	1	3	1	7.93	0.17	-2.56	0.0152418	0	166635	28340.3	35737.7			23115.2
I3L239	Heat shock protein 75 kDa, mitochondrial (Fragment) OS=Homo sapiens OX=9606 GN=TRAP1 PE=1 SV=1	6	1	3	1	2.2	0.01	-6.64	4.1949e-17		3.46861e+06			1.59699e+06
Q96QV1	Hedgehog-interacting protein OS=Homo sapiens OX=9606 GN=HHIP PE=1 SV=3	1	1	1	1	1.95	0.553	-0.85	0.756142	59.29	538629	309996		167133	525180	252842	92670.7	607281
P30519	Heme oxygenase 2 OS=Homo sapiens OX=9606 GN=HMOX2 PE=1 SV=2	23	3	3	3	8.56	0.803	-0.32	0.979208	28.44	964878	695639	206935	453997	440072	503894	496967
Q8NDA2	Hemicentin-2 OS=Homo sapiens OX=9606 GN=HMCN2 PE=2 SV=3	1	2	2	2	5.05	0.345	-1.54	0.317971	2.23	654116	225402		301163		186630	140874
P69905	Hemoglobin subunit alpha OS=Homo sapiens OX=9606 GN=HBA1 PE=1 SV=2	61	5	21	5	69.14	0.919	-0.12	0.979208	25.48	7.57533e+06	7.29543e+06	1.62643e+06	3.48777e+06	4.23776e+06	5.0317e+06	4.62867e+06	7.95364e+06
A0A7I2V4G0	Heterogeneous nuclear ribonucleoprotein A3 OS=Homo sapiens OX=9606 GN=HNRNPA3 PE=1 SV=1	4	2	2	2	3.53	0.953	-0.07	0.959834	0.35	734204	699368		338036		570425	444774	517078
Q8WVV9	Heterogeneous nuclear ribonucleoprotein L-like OS=Homo sapiens OX=9606 GN=HNRNPLL PE=1 SV=1	3	1	2	1	4.13	0.694	-0.53	0.920673	28.46	410772	285053	66915.1	189124	339635		191509	269196
Q6B0J5	HFE protein OS=Homo sapiens OX=9606 GN=HFE PE=1 SV=1	10	2	2	2	5.08	0.58	-0.79	0.795198	60.03	786465	456241	173017	266943	516802	253221	498973	456241
Q9UBN7	Histone deacetylase 6 OS=Homo sapiens OX=9606 GN=HDAC6 PE=1 SV=2	10	4	6	3	17.67	0.7	-0.52	0.922745	70.12	4.54181e+06	3.51395e+06	735669	2.59179e+06	2.98452e+06	2.86608e+06	2.80372e+06	3.16344e+06
Q03164	Histone-lysine N-methyltransferase 2A OS=Homo sapiens OX=9606 GN=KMT2A PE=1 SV=5	2	3	3	3	7.32	0.724	-0.47	0.942546	46.71	986880	605995	211653	480900	441003	341912	555806
D6RFY3	Histone-lysine N-methyltransferase PRDM16 OS=Homo sapiens OX=9606 GN=PRDM16 PE=1 SV=1	5	3	3	3	8.09	0.01	-6.64	4.1949e-17		384006			116486	382994
Q15047	Histone-lysine N-methyltransferase SETDB1 OS=Homo sapiens OX=9606 GN=SETDB1 PE=1 SV=1	1	1	1	1	1.75	0.391	-1.35	0.430381	10.83	743952	291249		318409	525890	237551
Q8TEK3	Histone-lysine N-methyltransferase, H3 lysine-79 specific OS=Homo sapiens OX=9606 GN=DOT1L PE=1 SV=3	5	4	6	4	13.53	0.626	-0.68	0.856892	79.13	206273	511053	20627.6	94970.6	397113	416830	418469	109140
P78426	Homeobox protein Nkx-6.1 OS=Homo sapiens OX=9606 GN=NKX6-1 PE=1 SV=2	5	2	4	2	6.93	0.589	-0.76	0.810588	55.36	1.25866e+06	366132			827090		506446	167938
A6NJT0	Homeobox protein unc-4 homolog OS=Homo sapiens OX=9606 GN=UNCX PE=3 SV=1	3	1	2	1	4.41	0.203	-2.3	0.0391461	0	1.9412e+06	394199			1.2756e+06	321520
Q9H2X6	Homeodomain-interacting protein kinase 2 OS=Homo sapiens OX=9606 GN=HIPK2 PE=1 SV=2	3	1	2	1	5.19	0.427	-1.23	0.512259	49.63	879606	375219	188647			425189		270073
Q86X24	HORMA domain-containing protein 1 OS=Homo sapiens OX=9606 GN=HORMAD1 PE=1 SV=1	7	2	3	2	6.27	0.338	-1.57	0.303844	70.84	350068	73268.1	79622.2	161176	162366	38846.7	46485.8	139324
M0QYP8	Hormone-sensitive lipase (Fragment) OS=Homo sapiens OX=9606 GN=LIPE PE=1 SV=1	7	1	1	1	2.71	0.525	-0.93	0.723493	2.06	596547	313404	129728	270871			198843
Q86YZ3	Hornerin OS=Homo sapiens OX=9606 GN=HRNR PE=1 SV=2	4	3	3	3	4.87	0.01	-6.64	4.1949e-17		772690		200954	293373
Q5I0Y5	HOXA10 protein OS=Homo sapiens OX=9606 GN=HOXA10 PE=1 SV=1	18	1	2	1	6.13	0.01	-6.64	4.1949e-17		1.4055e+06			820874	728079
P38567	Hyaluronidase PH-20 OS=Homo sapiens OX=9606 GN=SPAM1 PE=1 SV=1	4	1	1	1	2.69	0.713	-0.49	0.933028	32.4	4.54676e+06	3.06125e+06	1.1779e+06	1.71796e+06	2.98777e+06	2.17135e+06	1942247	4.23488e+06
Q9UJM8	Hydroxyacid oxidase 1 OS=Homo sapiens OX=9606 GN=HAO1 PE=1 SV=1	7	1	2	1	5.29	0.473	-1.08	0.626351	40.03	1.73743e+06	821583	372621				680688	629159
Q8WZA9	Immunity-related GTPase family Q protein OS=Homo sapiens OX=9606 GN=IRGQ PE=1 SV=1	3	1	1	1	2.12	0.404	-1.31	0.464343	60.42	1.08871e+06	439753	264082		632546	229617	435824
P01877	Immunoglobulin heavy constant alpha 2 OS=Homo sapiens OX=9606 GN=IGHA2 PE=1 SV=4	57	11	140	3	547.25	0.906	-0.14	0.979208	3.93	507479	459632		233649		529416	284085	459632
P01857	Immunoglobulin heavy constant gamma 1 OS=Homo sapiens OX=9606 GN=IGHG1 PE=1 SV=1	60	16	401	9	1468.43	0.882	-0.18	0.988256	30.65	3.3187e+08	3.39355e+08	7.55208e+07	1.52797e+08	2.14584e+08	2.76788e+08	1.81138e+08	3.45419e+08
A0A286YFJ8	Immunoglobulin heavy constant gamma 4 (Fragment) OS=Homo sapiens OX=9606 GN=IGHG4 PE=1 SV=1	49	11	98	5	329.81	0.936	-0.1	0.971533	15.75	5.58363e+06	5.2327e+06	1.39431e+06	2.54485e+06	3.66912e+06	4.26795e+06	3.73554e+06	4.92347e+06
S4R460	Immunoglobulin heavy variable 3/OR16-9 (non-functional) OS=Homo sapiens OX=9606 GN=IGHV3OR16-9 PE=1 SV=2	31	2	14	1	49.94	0.991	-0.01	0.946809	7.57	8.88118e+06	8.80216e+06	2.37341e+06	3.9152e+06	5.836e+06	7.56537e+06	5.58463e+06	8.5658e+06
P01834	Immunoglobulin kappa constant OS=Homo sapiens OX=9606 GN=IGKC PE=1 SV=2	91	13	405	13	1469.58	0.971	-0.04	0.957396	40.57	2.31947e+08	2.20958e+08	5.70086e+07	1.06791e+08	1.43467e+08	1.665e+08	1.40189e+08	2.38512e+08
A0A0C4DH72	Immunoglobulin kappa variable 1-6 OS=Homo sapiens OX=9606 GN=IGKV1-6 PE=3 SV=1	48	3	6	3	15.89	0.569	-0.81	0.779823	16.03	529473	301345	127137		310756	217826		340025
P01624	Immunoglobulin kappa variable 3-15 OS=Homo sapiens OX=9606 GN=IGKV3-15 PE=1 SV=2	26	2	5	2	14.13	0.959	-0.06	0.958135	14.1	2.23543e+06	2.02758e+06	395993	1.03368e+06	1.46895e+06	1.41661e+06	1.55603e+06	2.02758e+06
Q6UXK2	Immunoglobulin superfamily containing leucine-rich repeat protein 2 OS=Homo sapiens OX=9606 GN=ISLR2 PE=1 SV=1	4	1	2	1	5.03	0.451	-1.15	0.574021	41.12	1.18083e+06	532534	253249	519016	1.00705e+06	349140	606819	532534
Q8TDY8	Immunoglobulin superfamily DCC subclass member 4 OS=Homo sapiens OX=9606 GN=IGDCC4 PE=1 SV=1	2	1	1	1	3.22	0.455	-1.14	0.583112	46.5	1.18896e+06	554727		450237	949921	452452	163610	780839
Q6WRI0	Immunoglobulin superfamily member 10 OS=Homo sapiens OX=9606 GN=IGSF10 PE=1 SV=1	1	3	3	3	9.51	0.221	-2.18	0.0591985	0	773479	171240			508269	139669
Q9Y471	Inactive cytidine monophosphate-N-acetylneuraminic acid hydroxylase OS=Homo sapiens OX=9606 GN=CMAHP PE=1 SV=4	5	1	1	1	2.56	0.501	-1	0.68252	37.35	513263	257318			337275		127232	330178
Q9H792	Inactive tyrosine-protein kinase PEAK1 OS=Homo sapiens OX=9606 GN=PEAK1 PE=1 SV=4	2	2	2	2	4.29	0.01	-6.64	4.1949e-17		390416			178886	257791
A0A0A0MTJ5	Inactive tyrosine-protein kinase transmembrane receptor ROR1 OS=Homo sapiens OX=9606 GN=ROR1 PE=1 SV=1	6	2	2	2	6	0.556	-0.85	0.761329	77.8	1.13743e+06	632474	188377	523687	821022	1.19234e+06	401280	403501
Q9UK53	Inhibitor of growth protein 1 OS=Homo sapiens OX=9606 GN=ING1 PE=1 SV=2	11	2	3	2	7.32	0.968	-0.05	0.957396	23.55	78438.5	75964.3		36114			41144.8	88983.7
Q9Y2U8	Inner nuclear membrane protein Man1 OS=Homo sapiens OX=9606 GN=LEMD3 PE=1 SV=2	1	1	1	1	1.58	0.591	-0.76	0.810846	43.24	2.88846e+06	1.70578e+06	619480	1.78963e+06	1.68764e+06	1.07716e+06	1.78004e+06	1.70578e+06
A0A3F2YNW8	Inositol 1,4,5-trisphosphate receptor type 1 OS=Homo sapiens OX=9606 GN=ITPR1 PE=1 SV=1	2	4	9	4	20.54	0.755	-0.41	0.953569	14.91	859146	1.24814e+06	184258	356746	1130111	1.1776e+06	791896	552145
Q14573	Inositol 1,4,5-trisphosphate receptor type 3 OS=Homo sapiens OX=9606 GN=ITPR3 PE=1 SV=2	3	4	4	4	9.24	0.911	-0.13	0.979208	0	166784	152019		76789.1				152019
Q13349	Integrin alpha-D OS=Homo sapiens OX=9606 GN=ITGAD PE=1 SV=2	2	1	1	1	3.05	0.702	-0.51	0.924144	0	473684	332471			311267	271173
P26010	Integrin beta-7 OS=Homo sapiens OX=9606 GN=ITGB7 PE=1 SV=1	3	2	4	2	7.81	0.903	-0.15	0.979208	7.08	1.20312e+06	1.08612e+06	258030	562948	783950	885872	730635	1.02793e+06
Q8WWU7	Intelectin-2 OS=Homo sapiens OX=9606 GN=ITLN2 PE=2 SV=1	7	1	2	1	5.51	0.242	-2.05	0.0899643	0.27	636111	154019		293413	417232	125622
F8WAS2	Inter-alpha-trypsin inhibitor heavy chain H1 OS=Homo sapiens OX=9606 GN=ITIH1 PE=1 SV=1	57	10	51	1	192.11	0.447	-1.16	0.565178	12.34	857013	382911			563161	340678	242942	237558
Q9H9L3	Interferon-stimulated 20 kDa exonuclease-like 2 OS=Homo sapiens OX=9606 GN=ISG20L2 PE=1 SV=1	12	2	2	2	5.03	0.472	-1.08	0.624836	7.12	939249	442887		453701	588279	361232
Q8NI17	Interleukin-31 receptor subunit alpha OS=Homo sapiens OX=9606 GN=IL31RA PE=1 SV=1	5	3	3	3	6.31	0.329	-1.6	0.279983	97.69	1.79732e+06	591792	715596		636194		375470
A0A6Q8PFK2	Intraflagellar transport protein 172 homolog OS=Homo sapiens OX=9606 GN=IFT172 PE=1 SV=1	8	2	2	2	5.17	0.734	-0.45	0.946809	20.96	241998	177698		96115.2	184342	152025		169412
P63252	Inward rectifier potassium channel 2 OS=Homo sapiens OX=9606 GN=KCNJ2 PE=1 SV=1	5	1	2	1	4.67	0.97	-0.04	0.957396	40.49	1.56485e+06	1.51862e+06	256246		1.34677e+06		963508
P48200	Iron-responsive element-binding protein 2 OS=Homo sapiens OX=9606 GN=IREB2 PE=1 SV=4	4	2	2	2	4.16	0.01	-6.64	4.1949e-17		542650				356587
F8W0A2	Iron-sulfur protein NUBPL (Fragment) OS=Homo sapiens OX=9606 GN=NUBPL PE=1 SV=1	18	2	2	2	4.86	0.416	-1.26	0.483935	45.67	159944	51502.5	48697.4		74034.8	36500.2	32676.3	98989.3
O75874	Isocitrate dehydrogenase [NADP] cytoplasmic OS=Homo sapiens OX=9606 GN=IDH1 PE=1 SV=2	19	3	5	3	9.79	0.925	-0.11	0.97815	8.95	328292	303561			215727	263500	192598	210290
A0A590UJG1	Janus kinase and microtubule-interacting protein 3 OS=Homo sapiens OX=9606 GN=JAKMIP3 PE=1 SV=1	3	1	1	1	3	0.409	-1.29	0.475583	35.33	236148	96585		78733.5	214290	57009.3	84678.3
Q8IXQ5	Kelch-like protein 7 OS=Homo sapiens OX=9606 GN=KLHL7 PE=1 SV=2	9	2	4	2	7.56	0.529	-0.92	0.727206	4.58	646836	342462			425049		224102	332035
Q7Z794	Keratin, type II cytoskeletal 1b OS=Homo sapiens OX=9606 GN=KRT77 PE=1 SV=3	5	1	2	1	5.58	0.453	-1.14	0.578643	41.65	743000	336567		342086			281802	255038
H0YIC5	Keratin, type II cytoskeletal 73 (Fragment) OS=Homo sapiens OX=9606 GN=KRT73 PE=1 SV=1	12	2	6	2	13.28	0.01	-6.64	4.1949e-17		510700		109528	237494	312271
A0A1B0GUA8	Kinesin-like protein KIF13A OS=Homo sapiens OX=9606 GN=KIF13A PE=1 SV=1	1	2	2	1	3.69	0.494	-1.02	0.675096	22.16	636462	314275	158417	252493			199396
Q9NQT8	Kinesin-like protein KIF13B OS=Homo sapiens OX=9606 GN=KIF13B PE=1 SV=2	1	1	1	1	2	0.211	-2.25	0.04662	66.52	1.39252e+06	293259		641131			287406	189851
Q86VH2	Kinesin-like protein KIF27 OS=Homo sapiens OX=9606 GN=KIF27 PE=1 SV=1	4	3	3	3	6.19	0.369	-1.44	0.38144	21.82	776085	286307		308577	590535			286307
A0A6Q8PGG1	Kinesin-like protein KIF2A OS=Homo sapiens OX=9606 GN=KIF2A PE=1 SV=1	5	1	5	1	13.58	0.63	-0.67	0.857825	40.96	191201	146503	29476.3	122466		73160.9	102523	146503
Q5JR89	Kinesin-like protein KIF2C (Fragment) OS=Homo sapiens OX=9606 GN=KIF2C PE=1 SV=1	9	1	3	1	6.09	0.01	-6.64	4.1949e-17		816396			375878
O15066	Kinesin-like protein KIF3B OS=Homo sapiens OX=9606 GN=KIF3B PE=1 SV=1	5	2	2	2	5.3	0.763	-0.39	0.957396	25.99	718987	483367		428958	364601	383363	347261	483367
F8WER6	Kinesin-like protein OS=Homo sapiens OX=9606 GN=KIF3C PE=1 SV=2	9	2	2	2	5.16	0.888	-0.17	0.984661	98.44	541570	481056		249345		731484	163714
Q6H2G3	KIR3DL1 OS=Homo sapiens OX=9606 GN=KIR3DL1 PE=1 SV=1	6	1	1	1	3.46	0.497	-1.01	0.675096	48.71	385750	191861			253484		88139.2	264977
P09848	Lactase-phlorizin hydrolase OS=Homo sapiens OX=9606 GN=LCT PE=2 SV=3	1	1	1	1	2.69	0.781	-0.36	0.963869	41.03	1.07367e+06	722576	147271	494328	755631	437214	787429	722576
A0A1W2PQB4	Lactosylceramide alpha-2,3-sialyltransferase (Fragment) OS=Homo sapiens OX=9606 GN=ST3GAL5 PE=4 SV=1	35	1	1	1	2.26	0.789	-0.34	0.971356	32.4	1.42432e+06	983378	325644	655772	776428	2.40235e+06	591628	983378
A0A087WX80	Laminin subunit alpha-2 OS=Homo sapiens OX=9606 GN=LAMA2 PE=1 SV=1	2	3	3	3	7.06	0.606	-0.72	0.827779	0.62	703029	572007	150146	323683	586496	629460	268988
Q16363	Laminin subunit alpha-4 OS=Homo sapiens OX=9606 GN=LAMA4 PE=1 SV=4	3	3	9	3	22.62	0.734	-0.45	0.946809	36.5	1.75549e+06	1.28771e+06	295040		1.47205e+06		817005
Q13751	Laminin subunit beta-3 OS=Homo sapiens OX=9606 GN=LAMB3 PE=1 SV=1	5	3	3	3	7.3	0.438	-1.19	0.547448	47.97	483497	135289	108615	135027	317716	77992.6		191410
M0QXY7	L-amino-acid oxidase OS=Homo sapiens OX=9606 GN=IL4I1 PE=4 SV=1	11	1	1	1	2.01	0.966	-0.05	0.958135	47.77	922155	890927	261500	424571	334969	726666
V9GYI5	La-related protein 4B OS=Homo sapiens OX=9606 GN=LARP4B PE=1 SV=1	34	2	2	2	3.98	0.567	-0.82	0.779334	16.76	350998	199075	84605.6	143786			130798	192237
Q9BS40	Latexin OS=Homo sapiens OX=9606 GN=LXN PE=1 SV=2	14	1	1	1	2.84	0.522	-0.94	0.721744	29.2	454472	237141	97469.2	699834	239826		150457
F8VVQ3	LETM1 domain-containing protein 1 (Fragment) OS=Homo sapiens OX=9606 GN=LETMD1 PE=1 SV=8	8	1	1	1	2.5	0.01	-6.64	4.1949e-17		829669		177937
Q8WUT4	Leucine-rich repeat neuronal protein 4 OS=Homo sapiens OX=9606 GN=LRRN4 PE=1 SV=3	3	1	1	1	2.84	0.118	-3.08	0.00168429	0	693454	82141		319274				82141
Q9H756	Leucine-rich repeat-containing protein 19 OS=Homo sapiens OX=9606 GN=LRRC19 PE=1 SV=1	2	1	1	1	1.52	0.637	-0.65	0.866175	22.97	592651	377726	118884	291729		308084	297480	301674
A6NM36	Leucine-rich repeat-containing protein 30 OS=Homo sapiens OX=9606 GN=LRRC30 PE=4 SV=1	8	1	1	1	2.51	0.581	-0.78	0.797307	31.19	398572	231757		183507		153401	181191
Q96B70	Leukocyte receptor cluster member 9 OS=Homo sapiens OX=9606 GN=LENG9 PE=2 SV=2	3	1	1	1	1.54	0.764	-0.39	0.958001	6.11	511280	390701		225896	350107		247885
Q6ZUX7	LHFPL tetraspan subfamily member 2 protein OS=Homo sapiens OX=9606 GN=LHFPL2 PE=1 SV=2	12	1	2	1	5.37	0.407	-1.3	0.47257	64.95	1.76831e+06	720457	545377	814150	969941	431814	1271500	720457
A0A6Q8PHE0	Ligand-dependent nuclear receptor corepressor-like protein OS=Homo sapiens OX=9606 GN=LCORL PE=1 SV=1	6	1	1	1	2.51	0.01	-6.64	4.1949e-17		93873.3				61686.1
Q5T3J3	Ligand-dependent nuclear receptor-interacting factor 1 OS=Homo sapiens OX=9606 GN=LRIF1 PE=1 SV=1	4	2	4	2	9.82	0.852	-0.23	0.995247	41.35	2.23489e+06	2.15834e+06	254647	1.02897e+06	1.87819e+06	1.58106e+06	1.39056e+06	2.15834e+06
Q9NQ69	LIM/homeobox protein Lhx9 OS=Homo sapiens OX=9606 GN=LHX9 PE=1 SV=3	9	2	2	2	4.55	0.518	-0.95	0.713859	23.7	458631	246863	134748	191207	301376		170979	226139
Q5T7N2	LINE-1 type transposase domain-containing protein 1 OS=Homo sapiens OX=9606 GN=L1TD1 PE=1 SV=1	2	2	40	2	69.92	0.763	-0.39	0.957396	19.34	8.39211e+07	6.94549e+07	2.10986e+07	3.86382e+07	5.20238e+07	5.66495e+07	4.76302e+07	6.04338e+07
A0A1W2PRD2	Lipoyl synthase, mitochondrial OS=Homo sapiens OX=9606 GN=LIAS PE=4 SV=1	32	1	1	1	2.39	0.302	-1.73	0.211153	2.92	973299	293717	204667		652304			293717
G3V200	Liprin-alpha-2 OS=Homo sapiens OX=9606 GN=PPFIA2 PE=1 SV=2	1	1	1	1	2.25	0.93	-0.1	0.974997	54.39	432575	402348		135813	416843		152540	673329
Q6ZMR3	L-lactate dehydrogenase A-like 6A OS=Homo sapiens OX=9606 GN=LDHAL6A PE=2 SV=1	7	1	1	1	2.86	0.513	-0.96	0.706534	47.84	430394	220969	126773		205925			220969
Q9NZR2	Low-density lipoprotein receptor-related protein 1B OS=Homo sapiens OX=9606 GN=LRP1B PE=1 SV=2	1	3	3	3	6.8	0.756	-0.4	0.953569	27.78	1.27756e+06	966249	273994	460111	1.09353e+06	969790	613048	826758
Q9Y6Y9	Lymphocyte antigen 96 OS=Homo sapiens OX=9606 GN=LY96 PE=1 SV=2	20	1	1	1	2.61	0.547	-0.87	0.744339	34.21	311637	170615	90743.1	105679		103383	145708
Q6FG55	Lymphotoxin-alpha OS=Homo sapiens OX=9606 GN=LTA PE=1 SV=1	12	1	1	1	2.71	0.01	-6.64	4.1949e-17		161105		23625.8		154823
A0A087WZR3	Lys-63-specific deubiquitinase OS=Homo sapiens OX=9606 GN=BRCC3 PE=1 SV=1	6	1	1	1	2.23	0.01	-6.64	4.1949e-17		791471		114051	542350
O43593	Lysine-specific demethylase hairless OS=Homo sapiens OX=9606 GN=HR PE=1 SV=5	3	2	2	2	4.13	0.497	-1.01	0.675096	57.96	497290	247327	72818.2		478614			247327
J3QRR6	Lysophospholipase D GDPD1 (Fragment) OS=Homo sapiens OX=9606 GN=GDPD1 PE=1 SV=1	16	2	2	2	4.68	0.01	-6.64	4.1949e-17		438115		113621	166811
Q6ZWT7	Lysophospholipid acyltransferase 2 OS=Homo sapiens OX=9606 GN=MBOAT2 PE=1 SV=2	8	1	1	1	3.15	0.01	-6.64	4.1949e-17		423689		167958		150626
E9PJA2	Macrophage colony-stimulating factor 1 (Fragment) OS=Homo sapiens OX=9606 GN=CSF1 PE=1 SV=1	3	1	1	1	1.77	0.348	-1.52	0.323097	107.94	635108	220838	69316.4		820096		140113
E9PPP7	Maestro heat-like repeat-containing protein family member 6 (Fragment) OS=Homo sapiens OX=9606 GN=MROH6 PE=1 SV=8	4	2	2	2	3.55	0.995	-0.01	0.946809	30.42	677551	674153	145312			746324	354913	674153
Q9UJ55	MAGE-like protein 2 OS=Homo sapiens OX=9606 GN=MAGEL2 PE=1 SV=2	4	1	1	1	3.04	0.27	-1.89	0.139146	86.48	7.17606e+06	1.36272e+06	2020003	3.30394e+06	3.20381e+06	1.11147e+06	3.86482e+06	1314019
Q9HD23	Magnesium transporter MRS2 homolog, mitochondrial OS=Homo sapiens OX=9606 GN=MRS2 PE=1 SV=1	4	1	1	1	2.17	0.01	-6.64	4.1949e-17		6.39803e+07		13721654
D3DX46	MAGUK p55 subfamily member 3 OS=Homo sapiens OX=9606 GN=MPP3 PE=1 SV=1	6	2	3	2	8.8	0.528	-0.92	0.727206	22.79	325823	172156		128717	249527		109227
E9PG92	MAGUK p55 subfamily member 4 OS=Homo sapiens OX=9606 GN=MPP4 PE=1 SV=2	3	1	3	1	7.05	0.981	-0.03	0.953569	26.06	2.03445e+06	1.99679e+06	609265	936686	1.10193e+06	1.57424e+06	1.32223e+06	1.99679e+06
Q8IVS2	Malonyl-CoA-acyl carrier protein transacylase, mitochondrial OS=Homo sapiens OX=9606 GN=MCAT PE=1 SV=2	15	2	2	2	5.7	0.01	-6.64	4.1949e-17		696041			320465
A0A3B3IRW2	Mannosyl-oligosaccharide glucosidase OS=Homo sapiens OX=9606 GN=MOGS PE=1 SV=1	4	1	1	1	2.51	0.01	-6.64	4.1949e-17		175505		84319.2	80804.4	55435.8
C9J8E1	MAP kinase-activated protein kinase 3 (Fragment) OS=Homo sapiens OX=9606 GN=MAPKAPK3 PE=1 SV=1	13	2	2	2	4.9	0.652	-0.62	0.875485	9.5	802448	523240	172099			454994	311383
P35410	Mas-related G-protein coupled receptor MRG OS=Homo sapiens OX=9606 GN=MAS1L PE=2 SV=1	7	1	1	1	2.69	0.566	-0.82	0.779334	64.94	267089	132157	88179.2	122971	87149.6	70775.2	127703
D6R9N0	Matrin-3 (Fragment) OS=Homo sapiens OX=9606 GN=MATR3 PE=1 SV=2	100	1	1	1	2.03	0.01	-6.64	4.1949e-17		2.98334e+07				19604140
P14780	Matrix metalloproteinase-9 OS=Homo sapiens OX=9606 GN=MMP9 PE=1 SV=3	4	1	1	1	2.95	0.372	-1.43	0.387096	32.22	193450	71976		76687.1	147641	45730.9		92397.1
Q9Y6X3	MAU2 chromatid cohesion factor homolog OS=Homo sapiens OX=9606 GN=MAU2 PE=1 SV=2	7	1	2	1	6.1	0.752	-0.41	0.953288	15.61	406667	305949		168556	296842			305949
F8WAE6	Mediator of RNA polymerase II transcription subunit 12-like protein OS=Homo sapiens OX=9606 GN=MED12L PE=1 SV=1	4	4	4	4	9.83	0.01	-6.64	4.1949e-17		1.34664e+06		363559	492532
A0A7P0T8B6	Medium-chain-specific acyl-CoA dehydrogenase, mitochondrial OS=Homo sapiens OX=9606 GN=ACADM PE=4 SV=1	47	1	2	1	5.36	0.01	-6.64	4.1949e-17		1.26338e+06		239410	658318
P43355	Melanoma-associated antigen 1 OS=Homo sapiens OX=9606 GN=MAGEA1 PE=1 SV=1	4	1	1	1	1.55	0.01	-6.64	4.1949e-17		286872				188509
Q9UBF1	Melanoma-associated antigen C2 OS=Homo sapiens OX=9606 GN=MAGEC2 PE=1 SV=1	6	1	1	1	2.61	0.611	-0.71	0.836457	64.36	305559	186774	42992.2		306059			186774
J3KRD2	Membrane metallo-endopeptidase-like 1 (Fragment) OS=Homo sapiens OX=9606 GN=MMEL1 PE=1 SV=1	36	1	1	1	2.61	0.485	-1.04	0.656332	0	472386	229000			310415		145292
Q495T6	Membrane metallo-endopeptidase-like 1 OS=Homo sapiens OX=9606 GN=MMEL1 PE=2 SV=2	4	2	2	2	3.94	0.01	-6.64	4.1949e-17		242970			141880	125885
Q96QZ7	Membrane-associated guanylate kinase, WW and PDZ domain-containing protein 1 OS=Homo sapiens OX=9606 GN=MAGI1 PE=1 SV=3	2	2	2	2	3.75	0.626	-0.67	0.856892	80.16	446514	279716	64033.5	205580	296000	228144	389760	163052
O00562	Membrane-associated phosphatidylinositol transfer protein 1 OS=Homo sapiens OX=9606 GN=PITPNM1 PE=1 SV=4	4	1	1	1	3.1	0.752	-0.41	0.953288	15.61	406667	305949		168556	296842			305949
A0A0A0MS57	Membrane-spanning 4-domains subfamily A member 14 OS=Homo sapiens OX=9606 GN=MS4A14 PE=4 SV=1	1	1	2	1	3.21	0.875	-0.19	0.989665	17.74	1.19839e+06	1.03884e+06	315427	481378	787487	847308	816193	1.02676e+06
E7ET34	Membrane-spanning 4-domains subfamily A member 15 OS=Homo sapiens OX=9606 GN=MS4A15 PE=4 SV=2	11	1	10	1	26.08	0.284	-1.82	0.169945	130.86	945773	250134		1.2701e+06	213072	204017	248507	184231
C9JL63	Metabotropic glutamate receptor 2 OS=Homo sapiens OX=9606 GN=GRM2 PE=1 SV=2	3	1	1	1	2.67	0.339	-1.56	0.306683	0	161398	54749.7	34614.5					54749.7
B7ZLU9	Metabotropic glutamate receptor 4 OS=Homo sapiens OX=9606 GN=GRM4 PE=1 SV=1	4	2	2	2	4.31	0.01	-6.64	4.1949e-17		115029		23793.8	54910.6
P41594	Metabotropic glutamate receptor 5 OS=Homo sapiens OX=9606 GN=GRM5 PE=1 SV=2	6	2	2	2	5.32	0.01	-6.64	4.1949e-17		1.17277e+06		223848	606706
Q68D91	Metallo-beta-lactamase domain-containing protein 2 OS=Homo sapiens OX=9606 GN=MBLAC2 PE=1 SV=3	4	1	1	1	2.14	0.58	-0.79	0.795198	10.05	172100	99765.5			113090	56228.7	67902.1	99765.5
O94776	Metastasis-associated protein MTA2 OS=Homo sapiens OX=9606 GN=MTA2 PE=1 SV=1	7	2	5	2	14.43	0.811	-0.3	0.979208	15.48	2.92131e+06	2.48384e+06	626524	1.5018e+06	1.90126e+06	1.56085e+06	1.5759e+06	2.64413e+06
A0A5H1ZRP3	Methylcytosine dioxygenase TET OS=Homo sapiens OX=9606 GN=TET3 PE=1 SV=1	2	2	3	2	7.64	0.407	-1.3	0.47257	64.95	1.76831e+06	720457	545377	814150	969941	431814	1271500	720457
Q8NFU7	Methylcytosine dioxygenase TET1 OS=Homo sapiens OX=9606 GN=TET1 PE=1 SV=2	2	2	2	2	5.29	0.682	-0.55	0.914855	7.29	70431.8	48045.4			46282.1	37307.5		50466.1
Q96GX9	Methylthioribulose-1-phosphate dehydratase OS=Homo sapiens OX=9606 GN=APIP PE=1 SV=1	10	1	1	1	2.5	0.65	-0.62	0.874246	89.42	418042	271544		214651	246319	574916	172284	148835
B4DWM3	Methyltransferase-like protein 27 OS=Homo sapiens OX=9606 GN=METTL27 PE=2 SV=1	41	1	1	1	2.8	0.01	-6.64	4.1949e-17		1.2721e+06			585691
B0QY91	MICAL-like protein 1 OS=Homo sapiens OX=9606 GN=MICALL1 PE=1 SV=2	2	1	1	1	2.01	0.831	-0.27	0.984661	27.24	1.88816e+06	1.81766e+06	496082	869332	1.22244e+06	1.02744e+06	1153235	1.92117e+06
Q8WYQ5	Microprocessor complex subunit DGCR8 OS=Homo sapiens OX=9606 GN=DGCR8 PE=1 SV=1	1	1	1	1	1.61	0.01	-6.64	4.1949e-17		855092		183389
O15021	Microtubule-associated serine/threonine-protein kinase 4 OS=Homo sapiens OX=9606 GN=MAST4 PE=1 SV=4	4	5	6	5	13.96	0.854	-0.23	0.995247	24.86	916006	1.48909e+06	531184	201641	601926	577152	1.20324e+06	1.48909e+06
Q7Z434	Mitochondrial antiviral-signaling protein OS=Homo sapiens OX=9606 GN=MAVS PE=1 SV=2	6	1	1	1	2.55	0.435	-1.2	0.536317	0	561720	244306			369117			244306
F8WF41	Mitogen-activated protein kinase kinase kinase 13 OS=Homo sapiens OX=9606 GN=MAP3K13 PE=1 SV=1	21	1	1	1	3.15	0.01	-6.64	4.1949e-17		355643		76273.8	238113	203578
A0A1B0GTF4	Mitogen-activated protein kinase kinase kinase 19 (Fragment) OS=Homo sapiens OX=9606 GN=MAP3K19 PE=4 SV=1	2	1	1	1	2.94	0.087	-3.52	0.000185297	0	1.61688e+06	140768	346766				89311.7
Q6ZSM3	Monocarboxylate transporter 12 OS=Homo sapiens OX=9606 GN=SLC16A12 PE=1 SV=3	5	1	1	1	2.62	0.149	-2.75	0.00705635	84.82	170864	25456.7		135640	65118.1	20763.2
A0A087WX92	Monocarboxylate transporter 7 OS=Homo sapiens OX=9606 GN=SLC16A6 PE=1 SV=1	9	2	2	2	5.37	0.994	-0.01	0.946809	53.2	495368	492243		228073		846593	229839	492243
E7EWX8	Monoglyceride lipase OS=Homo sapiens OX=9606 GN=MGLL PE=1 SV=1	4	1	1	1	1.83	0.537	-0.9	0.729182	19.05	323343	173637	47408.9	148871	239772			173637
O60942	mRNA-capping enzyme OS=Homo sapiens OX=9606 GN=RNGTT PE=1 SV=1	11	3	3	3	7.76	0.67	-0.58	0.899409	38.42	581319	389385	233512	250867	381996	317594	242062	525572
Q8WXI7	Mucin-16 OS=Homo sapiens OX=9606 GN=MUC16 PE=1 SV=3	1	7	7	7	17.65	0.348	-1.52	0.325284	80.6	2.02167e+06	517538	508483	930798	1.13292e+06	269161	1.17569e+06	517538
E7EPM4	Mucin-17 OS=Homo sapiens OX=9606 GN=MUC17 PE=1 SV=1	1	2	3	2	8.81	0.01	-6.64	4.1949e-17		837720		181604	381574
Q7Z5P9	Mucin-19 OS=Homo sapiens OX=9606 GN=MUC19 PE=1 SV=3	2	5	9	5	24.91	0.481	-1.06	0.646448	2.79	1.98934e+06	956751		915917		765935	607022	1.63024e+06
H0Y9S8	Multiple C2 and transmembrane domain-containing protein 1 (Fragment) OS=Homo sapiens OX=9606 GN=MCTP1 PE=1 SV=1	15	1	5	1	14.99	0.338	-1.56	0.304463	43.72	917362	334009	196744	137412	6.20937e+06	75582.1	275490	334009
Q7Z7M0	Multiple epidermal growth factor-like domains protein 8 OS=Homo sapiens OX=9606 GN=MEGF8 PE=1 SV=2	1	2	3	2	7.5	0.463	-1.11	0.601267	79.35	2.38469e+06	914042	617404	1.09794e+06	676769	585982	579925	1.10294e+06
C9JYJ2	Musculoskeletal embryonic nuclear protein 1 OS=Homo sapiens OX=9606 GN=MUSTN1 PE=3 SV=1	20	1	1	1	2.47	0.399	-1.33	0.449533	38.34	398968	159146		142233	338584	129804
I3L1L3	Myb-binding protein 1A (Fragment) OS=Homo sapiens OX=9606 GN=MYBBP1A PE=1 SV=1	4	3	3	3	6.29	0.516	-0.95	0.70855	65.02	911415	648612			598909	192182	778501	648612
A1L2Z2	MYH14 protein OS=Homo sapiens OX=9606 GN=MYH14 PE=1 SV=1	3	2	2	2	3.97	0.643	-0.64	0.8714	20.6	633429	407475		291638		274659	258527	473232
P08590	Myosin light chain 3 OS=Homo sapiens OX=9606 GN=MYL3 PE=1 SV=3	10	1	1	1	2.67	0.815	-0.29	0.979208	50.32	195218	159181		89880.7		129833	60124.2	240954
P10916	Myosin regulatory light chain 2, ventricular/cardiac muscle isoform OS=Homo sapiens OX=9606 GN=MYL2 PE=1 SV=3	19	1	1	1	2.68	0.01	-6.64	4.1949e-17		512227			190753	416145
P12882	Myosin-1 OS=Homo sapiens OX=9606 GN=MYH1 PE=1 SV=3	2	2	6	1	12.98	0.561	-0.83	0.772234	1.05	4.6189e+06	2.59345e+06	990601			301390	1.64544e+06	2.61193e+06
P11055	Myosin-3 OS=Homo sapiens OX=9606 GN=MYH3 PE=2 SV=3	3	4	5	3	10.23	0.782	-0.35	0.964506	15.19	2.62512e+06	1.74508e+06	894007	1.20864e+06	1.31595e+06	1.44654e+06	1.10718e+06	1.6299e+06
A4FU01	Myotubularin-related protein 11 OS=Homo sapiens OX=9606 GN=MTMR11 PE=2 SV=2	5	2	4	2	8.56	0.573	-0.8	0.783462	29.7	536985	307807	81880.2	247234	423456		199344	301550
Q86U44	N6-adenosine-methyltransferase catalytic subunit OS=Homo sapiens OX=9606 GN=METTL3 PE=1 SV=2	4	2	2	2	4.01	0.539	-0.89	0.730078	46.2	173353	85815.4		111641	81438.3	91204.8	54446.6	78186.2
J3QRL7	N-acetyltransferase 9 OS=Homo sapiens OX=9606 GN=NAT9 PE=1 SV=1	5	1	1	1	2.02	0.648	-0.63	0.8714	6.67	381840	247530		172522	255687	294672	150311	247530
K7ESK5	NACHT, LRR and PYD domains-containing protein 4 (Fragment) OS=Homo sapiens OX=9606 GN=NLRP4 PE=1 SV=1	3	1	1	1	2.05	0.971	-0.04	0.957396	28.99	549573	533369	97047.7	307307			338402
M0R0W4	NACHT, LRR and PYD domains-containing protein 5 (Fragment) OS=Homo sapiens OX=9606 GN=NLRP5 PE=1 SV=1	12	1	10	1	28.02	0.382	-1.39	0.405646	87.9	2.89456e+06	1.10433e+06	109794	1.33269e+06	3.0298e+06	969997	547932	1.10433e+06
Q8NFW8	N-acylneuraminate cytidylyltransferase OS=Homo sapiens OX=9606 GN=CMAS PE=1 SV=2	8	2	2	2	5.01	0.01	-6.64	4.1949e-17		353762			162876
Q5T3I3	NAD(P)H-hydrate epimerase OS=Homo sapiens OX=9606 GN=NAXE PE=1 SV=1	7	1	2	1	6.03	0.648	-0.63	0.8714	0	366522	237606			240849	193799
Q9NTG7	NAD-dependent protein deacetylase sirtuin-3, mitochondrial OS=Homo sapiens OX=9606 GN=SIRT3 PE=1 SV=2	12	2	3	2	7.74	0.788	-0.34	0.971332	24.45	222789	175602	91376.8	102575	122254	143226	99767.1	182077
P28331	NADH-ubiquinone oxidoreductase 75 kDa subunit, mitochondrial OS=Homo sapiens OX=9606 GN=NDUFS1 PE=1 SV=3	4	1	2	1	5.03	0.455	-1.14	0.582409	94.65	2.29493e+06	1.0437e+06	60136.1	1.05661e+06	2.7347e+06		838827	823912
P48163	NADP-dependent malic enzyme OS=Homo sapiens OX=9606 GN=ME1 PE=1 SV=1	1	1	1	1	1.6	0.698	-0.52	0.922193	0.53	245373	171183	48667.7	112972	161816			171183
O14513	Nck-associated protein 5 OS=Homo sapiens OX=9606 GN=NCKAP5 PE=1 SV=2	1	2	2	2	4.23	0.816	-0.29	0.979208	27.95	668162	545387	180798	249642	439063		346027
P20929	Nebulin OS=Homo sapiens OX=9606 GN=NEB PE=1 SV=5	1	5	6	5	12.9	0.01	-6.64	4.1949e-17		1.326e+06				871343
Q92692	Nectin-2 OS=Homo sapiens OX=9606 GN=NECTIN2 PE=1 SV=1	2	1	1	1	1.58	0.354	-1.5	0.339819	42.96	1.0838e+06	314974	232819	498996	407522		243482	258517
E7ENN3	Nesprin-1 OS=Homo sapiens OX=9606 GN=SYNE1 PE=1 SV=2	2	7	9	7	19.71	0.596	-0.75	0.814736	34.2	800211	505495		746675	259459	681320		305897
G3V533	Nesprin-3 OS=Homo sapiens OX=9606 GN=SYNE3 PE=1 SV=1	3	1	1	1	2.72	0.739	-0.44	0.946809	24.28	566498	418905		214181	453321	416551	218002
Q9ULJ8	Neurabin-1 OS=Homo sapiens OX=9606 GN=PPP1R9A PE=1 SV=2	3	1	1	1	2.7	0.325	-1.62	0.269246	86.08	1.9542e+07	6358001	4.19112e+06	9570513	8508565	3.12297e+06	10230867	6358001
A0A087WWT2	Neuritin OS=Homo sapiens OX=9606 GN=NRN1 PE=1 SV=1	11	1	1	1	2.29	0.757	-0.4	0.953672	9.22	5.41248e+06	4.09747e+06	1.33283e+06	2.49197e+06	3.33552e+06	3220261	2826875	4.09747e+06
O14594	Neurocan core protein OS=Homo sapiens OX=9606 GN=NCAN PE=1 SV=3	3	2	3	2	8	0.215	-2.22	0.0513709	105.15	1.52975e+06	328875	701662	329323		227687	245823
O94856	Neurofascin OS=Homo sapiens OX=9606 GN=NFASC PE=1 SV=4	1	2	2	2	3.49	0.01	-6.64	4.1949e-17		402639		86352.7	236948	252219
H0Y465	Neurofibromin (Fragment) OS=Homo sapiens OX=9606 GN=NF1 PE=1 SV=1	2	2	2	2	5.37	0.397	-1.33	0.445007	0	423297	168084			278157			168084
Q8NFZ4	Neuroligin-2 OS=Homo sapiens OX=9606 GN=NLGN2 PE=1 SV=1	2	1	1	1	2.05	0.347	-1.53	0.322191	57.94	1.0966e+06	380570	235184			211966	353592
Q8IVL0	Neuron navigator 3 OS=Homo sapiens OX=9606 GN=NAV3 PE=1 SV=3	2	2	3	2	7.14	0.705	-0.5	0.928069	22.38	886960	625207		408366		443049	486800	625207
Q9Y5X5	Neuropeptide FF receptor 2 OS=Homo sapiens OX=9606 GN=NPFFR2 PE=1 SV=2	4	1	10	1	24.07	0.586	-0.77	0.804287	33.03	3.33189e+06	1.95144e+06	762673	1.53404e+06	2.02225e+06	1.30164e+06	1.84091e+06	1.95144e+06
P30990	Neurotensin/neuromedin N OS=Homo sapiens OX=9606 GN=NTS PE=1 SV=2	23	1	3	1	9.71	0.123	-3.02	0.00220924	49.05	1.83371e+06	226290	393270	762096	1.24227e+06	1.04154e+06	107879	226290
E7EWB6	Neutral alpha-glucosidase C OS=Homo sapiens OX=9606 GN=GANC PE=1 SV=1	2	1	1	1	1.81	0.877	-0.19	0.988424	13.3	893832	834321		452685	533958	719858	529345	696509
P43007	Neutral amino acid transporter A OS=Homo sapiens OX=9606 GN=SLC1A4 PE=1 SV=1	6	1	1	1	2.62	0.406	-1.3	0.47117	14.49	592897	240962		302180	351952	188650		251034
Q07837	Neutral and basic amino acid transport protein rBAT OS=Homo sapiens OX=9606 GN=SLC3A1 PE=1 SV=2	5	2	2	2	4.03	0.538	-0.9	0.729738	10.38	162889	87567.3			107038	71422.5	51922.9	309670
Q15080	Neutrophil cytosol factor 4 OS=Homo sapiens OX=9606 GN=NCF4 PE=1 SV=2	9	1	1	1	3.08	0.629	-0.67	0.857825	90.09	958144	602690	330358	441141	198211		382384
Q9UBC1	NF-kappa-B inhibitor-like protein 1 OS=Homo sapiens OX=9606 GN=NFKBIL1 PE=1 SV=1	8	1	1	1	2.71	0.816	-0.29	0.979208	21.62	133619	110287	37895.5	61519.6	75423	98228.8		100996
A0A087X1V5	Nibrin (Fragment) OS=Homo sapiens OX=9606 GN=NBN PE=1 SV=1	9	1	2	1	3.27	0.729	-0.46	0.946809	35.54	208828	152262			137225	163350	76152.3	152262
C9J066	Ninein OS=Homo sapiens OX=9606 GN=NIN PE=1 SV=1	1	2	2	2	4.04	0.373	-1.42	0.388697	22.77	502732	187634		274151	278917	138230		207737
H0Y2V7	Ninein-like protein (Fragment) OS=Homo sapiens OX=9606 GN=NINL PE=1 SV=1	14	1	1	1	2.68	0.887	-0.17	0.984661	51.89	281434	235156	76757.7	64055.2	184936	149458	149198	317467
A0A590UJR9	Ninjurin 2, isoform CRA_a OS=Homo sapiens OX=9606 GN=NINJ2 PE=1 SV=1	9	1	1	1	2.18	0.382	-1.39	0.406064	23.97	553746	211389		276196	335889	60929	160500	211389
A0A087WYW3	NK-tumor recognition protein OS=Homo sapiens OX=9606 GN=NKTR PE=1 SV=1	1	1	4	1	8.5	0.554	-0.85	0.757104	0	546247	302490			358950			302490
A0A6Q8PF28	N-myc downstream-regulated gene 1 protein (Fragment) OS=Homo sapiens OX=9606 GN=NDRG1 PE=1 SV=1	48	1	6	1	16.98	0.14	-2.83	0.00494872	1.91	764468	107142	161856	356532				107142
E5RJY1	N-myc downstream-regulated gene 1 protein OS=Homo sapiens OX=9606 GN=NDRG1 PE=1 SV=1	30	1	3	1	8.75	0.658	-0.6	0.88033	9.82	552940	363886		254041	364119		216060	388831
H0YME5	Non-specific serine/threonine protein kinase (Fragment) OS=Homo sapiens OX=9606 GN=EIF2AK4 PE=1 SV=1	3	2	2	2	4.91	0.747	-0.42	0.947261	6.04	1.06903e+06	798319	300120	492194	673766		515012	785128
H0Y7R3	Non-specific serine/threonine protein kinase (Fragment) OS=Homo sapiens OX=9606 GN=WNK2 PE=1 SV=1	2	2	4	2	10.87	0.318	-1.65	0.248713	59.13	1.15674e+06	185214		580450	697422	210146	84474.5
J3KNR0	Non-specific serine/threonine protein kinase OS=Homo sapiens OX=9606 GN=MARK3 PE=1 SV=2	3	1	1	1	2.65	0.31	-1.69	0.226645	97.11	789759	244587			518966	369149		132177
A0A669KBJ4	Non-specific serine/threonine protein kinase OS=Homo sapiens OX=9606 GN=MAST2 PE=1 SV=1	2	3	3	3	5.9	0.917	-0.12	0.979208	8.54	1.09905e+06	993454	186613	506015	752758	810290	666613	972025
A6NGQ3	Non-specific serine/threonine protein kinase OS=Homo sapiens OX=9606 GN=OBSCN PE=1 SV=5	1	3	5	3	13.85	0.18	-2.48	0.0206175	61.97	2.14572e+06	385668	460185			209449		579219
F6RJM5	Non-specific serine/threonine protein kinase OS=Homo sapiens OX=9606 GN=RPS6KC1 PE=1 SV=1	7	3	3	3	6.91	0.715	-0.48	0.933515	26.02	3.04538e+06	2.31285e+06	592863	1.54467e+06		2.0288e+06	1.46742e+06	1.02702e+06
O60285	NUAK family SNF1-like kinase 1 OS=Homo sapiens OX=9606 GN=NUAK1 PE=1 SV=1	4	1	1	1	2.5	0.188	-2.41	0.026189	90.98	3.36974e+06	633417	1.39482e+06	1.55147e+06	855503		401879
Q16236	Nuclear factor erythroid 2-related factor 2 OS=Homo sapiens OX=9606 GN=NFE2L2 PE=1 SV=3	7	1	1	1	3.21	0.849	-0.24	0.994726	16.44	764004	648954		314911	560783		411736
Q9Y6Q9	Nuclear receptor coactivator 3 OS=Homo sapiens OX=9606 GN=NCOA3 PE=1 SV=1	1	1	2	1	5.68	0.281	-1.83	0.163659	39.91	1.41991e+06	399507			933052		330734	306180
C9JE98	Nuclear receptor corepressor 2 OS=Homo sapiens OX=9606 GN=NCOR2 PE=1 SV=1	2	2	2	2	5.3	0.331	-1.59	0.284507	26.41	660677	218772	169166		363639			218772
Q05952	Nuclear transition protein 2 OS=Homo sapiens OX=9606 GN=TNP2 PE=1 SV=1	25	1	2	1	5.22	0.957	-0.06	0.958135	64.95	1.12324e+06	1.07476e+06	287901	432718		876609	267995	1943176
O60287	Nucleolar pre-ribosomal-associated protein 1 OS=Homo sapiens OX=9606 GN=URB1 PE=1 SV=4	1	1	2	1	2.74	0.293	-1.77	0.191633	16.4	464211	136235	102166	208271		99217.4		152574
Q5TH74	O(6)-methylguanine-induced apoptosis 2 OS=Homo sapiens OX=9606 GN=STPG1 PE=1 SV=1	7	1	1	1	2.64	0.304	-1.72	0.215545	0	993827	301879		457569				301879
Q8NGD4	Olfactory receptor 4K1 OS=Homo sapiens OX=9606 GN=OR4K1 PE=2 SV=1	11	1	1	1	3.23	0.526	-0.93	0.723493	62.72	411036	216079		285541	179013		137094
Q13415	Origin recognition complex subunit 1 OS=Homo sapiens OX=9606 GN=ORC1 PE=1 SV=2	4	2	3	2	6.77	0.767	-0.38	0.958135	8.55	423258	324544		200959	269709		218521	305815
Q6ZRI0	Otogelin OS=Homo sapiens OX=9606 GN=OTOG PE=2 SV=3	2	2	3	2	9.84	0.693	-0.53	0.920673	21.5	199339	239154		138800	86613.1	302873	125474	239154
A0A2R8YEX0	Oxysterol-binding protein OS=Homo sapiens OX=9606 GN=OSBPL2 PE=1 SV=1	5	1	1	1	2.64	0.604	-0.73	0.8248	54.22	5.04596e+06	3.04614e+06	1.73111e+06	2.32322e+06	2.10599e+06	2.48452e+06	1.93523e+06	2134518
Q9H0X9	Oxysterol-binding protein-related protein 5 OS=Homo sapiens OX=9606 GN=OSBPL5 PE=1 SV=1	5	2	3	2	8.28	0.212	-2.24	0.0482812	109.19	1.9931e+06	422937	61188.1	1.59348e+06	1.3097e+06			422937
B1ALY0	PALM2 and AKAP2 fusion (Fragment) OS=Homo sapiens OX=9606 GN=PALM2AKAP2 PE=1 SV=1	9	2	2	2	4.44	0.19	-2.39	0.0278663	0	5.30059e+06	1.00839e+06	1136801				639784
X6R7I6	Pancreatic progenitor cell differentiation and proliferation factor OS=Homo sapiens OX=9606 GN=PPDPF PE=1 SV=1	11	1	2	1	4.21	0.403	-1.31	0.462788	8.99	604881	243811		262127	422298		154689
Q13219	Pappalysin-1 OS=Homo sapiens OX=9606 GN=PAPPA PE=1 SV=3	2	2	2	2	3.95	0.01	-6.64	4.1949e-17		754078		83702.1	370942	495520
Q86YC2	Partner and localizer of BRCA2 OS=Homo sapiens OX=9606 GN=PALB2 PE=1 SV=1	5	3	4	3	6.33	0.27	-1.89	0.140725	0	507296	137142		233565		111857
Q9GZU2	Paternally-expressed gene 3 protein OS=Homo sapiens OX=9606 GN=PEG3 PE=1 SV=1	4	3	3	3	9.39	0.982	-0.03	0.953288	5.83	473555	467622		209588	323717	368976	303586	467622
O00151	PDZ and LIM domain protein 1 OS=Homo sapiens OX=9606 GN=PDLIM1 PE=1 SV=4	7	1	1	1	2.39	0.53	-0.92	0.727206	6.94	1.02007e+06	558523	314462	469652	668025	455548	327812	777416
O15018	PDZ domain-containing protein 2 OS=Homo sapiens OX=9606 GN=PDZD2 PE=1 SV=4	2	2	3	2	7.03	0.01	-6.64	4.1949e-17		623315				409593
J3KN11	Peptidyl-prolyl cis-trans isomerase FKBP11 OS=Homo sapiens OX=9606 GN=FKBP11 PE=1 SV=1	20	1	1	1	2.14	0.654	-0.61	0.875531	34.45	772939	410217	165770	380040	393902	498664	260267	392065
A0A7I2V3S6	Peptidylprolyl isomerase OS=Homo sapiens OX=9606 GN=FKBP1A PE=1 SV=1	11	1	1	1	2.41	0.893	-0.16	0.984661	23.19	122984	109780			80815.4	76622.2	81393.4
Q9BXM0	Periaxin OS=Homo sapiens OX=9606 GN=PRX PE=1 SV=2	2	2	2	2	4.63	0.774	-0.37	0.958237	43.62	1.83752e+06	1.42291e+06	510041	846015	768927	1.10463e+06	1.02364e+06	1.42291e+06
Q15067	Peroxisomal acyl-coenzyme A oxidase 1 OS=Homo sapiens OX=9606 GN=ACOX1 PE=1 SV=3	3	1	1	1	2.74	0.458	-1.13	0.588811	30.97	4.65864e+06	2.24308e+06		1.90557e+06	3.44576e+06	1.07106e+06	1.42315e+06	2.56896e+06
A5PKW4	PH and SEC7 domain-containing protein 1 OS=Homo sapiens OX=9606 GN=PSD PE=1 SV=2	3	2	3	2	6.76	0.533	-0.91	0.729182	43.19	412594	145899	62457	189963	520331	118999	45337.2	200397
A0A087X1Z0	PH and SEC7 domain-containing protein 3 OS=Homo sapiens OX=9606 GN=PSD3 PE=1 SV=1	4	1	1	1	2.17	0.693	-0.53	0.920673	0	242612	168039			159425	137058
Q8NDX1	PH and SEC7 domain-containing protein 4 OS=Homo sapiens OX=9606 GN=PSD4 PE=1 SV=2	4	2	2	2	5.1	0.975	-0.04	0.954953	11.91	1.50454e+06	1.47e+06	298683	692708	1198660	1.10807e+06	1.0036e+06	1.47e+06
Q9NSD9	Phenylalanine--tRNA ligase beta subunit OS=Homo sapiens OX=9606 GN=FARSB PE=1 SV=3	1	1	2	1	4.03	0.937	-0.09	0.971356	57.62	1.00067e+06	814998		299451	1.01168e+06	558806	517085	1.28302e+06
Q9C0D0	Phosphatase and actin regulator 1 OS=Homo sapiens OX=9606 GN=PHACTR1 PE=1 SV=3	2	1	1	1	2.25	0.77	-0.38	0.958135	33.4	447053	344292		191139	316344	213592	218440	481297
Q8TCU6	Phosphatidylinositol 3,4,5-trisphosphate-dependent Rac exchanger 1 protein OS=Homo sapiens OX=9606 GN=PREX1 PE=1 SV=3	2	1	2	1	5.96	0.569	-0.81	0.779823	44.62	530556	301874		181582	469009			301874
A0A1W2PS05	Phosphatidylinositol 3-kinase catalytic subunit type 3 OS=Homo sapiens OX=9606 GN=PIK3C3 PE=1 SV=1	3	1	3	1	8.17	0.925	-0.11	0.977947	8.17	951798	885851	193134		661052	722527	603325	815986
P42356	Phosphatidylinositol 4-kinase alpha OS=Homo sapiens OX=9606 GN=PI4KA PE=1 SV=4	2	2	3	2	7.26	0.381	-1.39	0.404622	13.86	2.80041e+06	1.0669e+06	600596			955346		971798
O00443	Phosphatidylinositol 4-phosphate 3-kinase C2 domain-containing subunit alpha OS=Homo sapiens OX=9606 GN=PIK3C2A PE=1 SV=2	2	2	2	2	5.91	0.642	-0.64	0.8714	40.52	370282	237886	79413.3			148111	197720
P18669	Phosphoglycerate mutase 1 OS=Homo sapiens OX=9606 GN=PGAM1 PE=1 SV=2	9	1	1	1	3.5	0.952	-0.07	0.960972	25.31	1.16671e+08	1.11027e+08	9898567	53716648	86145200	90557232	74290752	94838368
A0A6Q8PHN3	Phosphoinositide phospholipase C (Fragment) OS=Homo sapiens OX=9606 GN=PLCE1 PE=1 SV=1	2	3	4	2	9.68	0.594	-0.75	0.810846	81.56	1.95153e+06	614552	80151	1.04988e+06	1.28239e+06	501247	847361	599706
A0A2U3TZV8	Phosphoinositide phospholipase C OS=Homo sapiens OX=9606 GN=PLCH1 PE=1 SV=1	1	1	1	1	2.7	0.742	-0.43	0.946809	0	392833	291317			258138	237607
Q6T4P5	Phospholipid phosphatase-related protein type 3 OS=Homo sapiens OX=9606 GN=PLPPR3 PE=2 SV=1	3	1	1	1	2.16	0.625	-0.68	0.855088	28.62	599308	385117		226539	479676	255290	244342	448199
A0A7I2V5U0	Phospholipid-transporting ATPase ABCA1 OS=Homo sapiens OX=9606 GN=ABCA1 PE=1 SV=1	2	3	4	3	8.03	0.01	-6.64	4.1949e-17		64076.1				42105.7
Q9H008	Phospholysine phosphohistidine inorganic pyrophosphate phosphatase OS=Homo sapiens OX=9606 GN=LHPP PE=1 SV=2	9	1	1	1	2.65	0.804	-0.32	0.979208	45.16	591867	581082	202339	217796	388928	618318	237161	581082
F6VCX5	Phosphorylase kinase OS=Homo sapiens OX=9606 GN=PHKG1 PE=1 SV=1	8	1	1	1	3.35	0.69	-0.54	0.920673	11.11	643414	443806		296235		571732	281578	412873
Q96BK5	PIN2/TERF1-interacting telomerase inhibitor 1 OS=Homo sapiens OX=9606 GN=PINX1 PE=1 SV=2	4	1	1	1	2.11	0.694	-0.53	0.920673	42.42	75407.6	52325.7	12194.5		65716.1		33198.6
P18509	Pituitary adenylate cyclase-activating polypeptide OS=Homo sapiens OX=9606 GN=ADCYAP1 PE=1 SV=3	11	1	1	1	2.16	0.782	-0.36	0.96444	20.38	732627	572716	180202	294112				572716
A5PLL7	Plasmanylethanolamine desaturase OS=Homo sapiens OX=9606 GN=PEDS1 PE=1 SV=3	16	2	2	2	5.3	0.941	-0.09	0.968074	50.68	442106	416137		284696	207713		264023
Q14651	Plastin-1 OS=Homo sapiens OX=9606 GN=PLS1 PE=1 SV=2	2	1	1	1	2.09	0.835	-0.26	0.98553	29.58	211701	176834		118837	114099		112194
D6RJH0	Platelet-derived growth factor receptor alpha (Fragment) OS=Homo sapiens OX=9606 GN=PDGFRA PE=1 SV=1	12	1	1	1	2.77	0.341	-1.55	0.311343	86.77	2.33583e+06	796811	851871	1075441	636583		505547
Q9ULL1	Pleckstrin homology domain-containing family G member 1 OS=Homo sapiens OX=9606 GN=PLEKHG1 PE=1 SV=2	3	4	5	4	8.52	0.3	-1.74	0.208024	16.41	1.02472e+06	307441	219769			280047		275287
Q3KR16	Pleckstrin homology domain-containing family G member 6 OS=Homo sapiens OX=9606 GN=PLEKHG6 PE=1 SV=3	3	1	1	1	2.58	0.306	-1.71	0.222383	0	1.63917e+06	502054			1.07713e+06			502054
E5RGK1	Pleckstrin homology domain-containing family H member 2 OS=Homo sapiens OX=9606 GN=PLEKHH2 PE=4 SV=1	30	2	2	2	4.17	0.629	-0.67	0.857825	4.93	668818	420542		307931		343007	276002	369182
Q5SXH7	Pleckstrin homology domain-containing family S member 1 OS=Homo sapiens OX=9606 GN=PLEKHS1 PE=1 SV=4	4	2	9	2	25.48	0.448	-1.16	0.565178	142.56	8.50844e+06	580603	1.82478e+06	6.22296e+06	561118	8.11268e+06	242449	580603
H0YJ64	Pleckstrin-2 (Fragment) OS=Homo sapiens OX=9606 GN=PLEK2 PE=1 SV=1	13	2	2	2	5.61	0.555	-0.85	0.760775	28.9	590642	327863	153751	224047			208016
O43157	Plexin-B1 OS=Homo sapiens OX=9606 GN=PLXNB1 PE=1 SV=3	2	1	1	1	3.39	0.76	-0.4	0.957396	36.21	198023	141690	34561.5	91172.2	141828		70554.3	180536
B7Z9U0	Poly(A)-specific ribonuclease OS=Homo sapiens OX=9606 GN=CNOT8 PE=1 SV=1	27	2	4	2	9.73	0.471	-1.09	0.623455	13.67	1.63203e+06	503090	484644	751404	702374		319191
Q8NCW6	Polypeptide N-acetylgalactosaminyltransferase 11 OS=Homo sapiens OX=9606 GN=GALNT11 PE=1 SV=2	2	1	1	1	2.14	0.01	-6.64	4.1949e-17		433353		142871	129791
P57789	Potassium channel subfamily K member 10 OS=Homo sapiens OX=9606 GN=KCNK10 PE=1 SV=1	2	1	2	1	4.95	0.301	-1.73	0.209652	10.69	787469	236828		362560			161487	220361
Q9NYG8	Potassium channel subfamily K member 4 OS=Homo sapiens OX=9606 GN=KCNK4 PE=1 SV=2	6	1	1	1	2.93	0.01	-6.64	4.1949e-17		347470		74520.8	207471	215005
E5RHP1	Potassium channel subfamily U member 1 OS=Homo sapiens OX=9606 GN=KCNU1 PE=1 SV=1	4	1	1	1	3.45	0.055	-4.17	4.30336e-06	33	2.86603e+06	158865	766505		1.51026e+06			158865
Q96RP8	Potassium voltage-gated channel subfamily A member 7 OS=Homo sapiens OX=9606 GN=KCNA7 PE=2 SV=1	8	1	1	1	2.61	0.715	-0.48	0.933505	39.09	440524	314819		200129	293374		153376	409987
Q9UQ05	Potassium voltage-gated channel subfamily H member 4 OS=Homo sapiens OX=9606 GN=KCNH4 PE=2 SV=1	3	2	2	2	4.13	0.806	-0.31	0.979208	11.21	402639	267826	86352.7	389880	252219	143095	183823	267826
Q96L42	Potassium voltage-gated channel subfamily H member 8 OS=Homo sapiens OX=9606 GN=KCNH8 PE=2 SV=2	2	1	2	1	4.28	0.01	-6.64	4.1949e-17		738533			282646	583832
A5A3E0	POTE ankyrin domain family member F OS=Homo sapiens OX=9606 GN=POTEF PE=1 SV=2	3	2	2	2	4.74	0.01	-6.64	4.1949e-17		290213		74762.7	133617	143878
P57071	PR domain zinc finger protein 15 OS=Homo sapiens OX=9606 GN=PRDM15 PE=1 SV=4	2	2	2	2	4	0.01	-6.64	4.1949e-17		481519		85896		380417
D6RED5	PR domain zinc finger protein 2 OS=Homo sapiens OX=9606 GN=PRDM2 PE=4 SV=1	35	1	1	1	2.58	0.01	-6.64	4.1949e-17		412675			144366	356898
Q9UQ72	Pregnancy-specific beta-1-glycoprotein 11 OS=Homo sapiens OX=9606 GN=PSG11 PE=2 SV=3	12	1	1	1	3.3	0.429	-1.22	0.519327	0	677341	290798			445095			290798
Q5SRN1	Pre-mRNA-processing factor 17 OS=Homo sapiens OX=9606 GN=CDC40 PE=1 SV=1	6	2	2	2	4.48	0.714	-0.49	0.933028	15.06	1.45808e+07	1.04822e+07	2.84107e+06	6.71319e+06	10628498	9417926	6650547	7126277
Q9ULR0	Pre-mRNA-splicing factor ISY1 homolog OS=Homo sapiens OX=9606 GN=ISY1 PE=1 SV=3	3	1	1	1	1.73	0.497	-1.01	0.675096	21.93	117810	58559.8	25266.4	62264.8	45509.5		37154
E5RHA8	Pre-mRNA-splicing factor RBM22 (Fragment) OS=Homo sapiens OX=9606 GN=RBM22 PE=1 SV=1	11	1	1	1	2.57	0.86	-0.22	0.999805	241.73	1.44744e+06	1.24443e+06		2.36117e+06	268452		789541
Q96HY7	Probable 2-oxoglutarate dehydrogenase E1 component DHKTD1, mitochondrial OS=Homo sapiens OX=9606 GN=DHTKD1 PE=1 SV=2	5	2	4	2	8.67	0.428	-1.22	0.517056	42.94	521912	223360	160792		238746	142522		285510
Q96GQ7	Probable ATP-dependent RNA helicase DDX27 OS=Homo sapiens OX=9606 GN=DDX27 PE=1 SV=2	3	1	4	1	10.38	0.347	-1.53	0.322525	70.89	2.40853e+06	823050	516551	1.31049e+06	1.29653e+06	388592	902106
Q9NQI0	Probable ATP-dependent RNA helicase DDX4 OS=Homo sapiens OX=9606 GN=DDX4 PE=1 SV=2	3	1	2	1	4.73	0.453	-1.14	0.578643	70.19	346447	157111		218939	165860	69552.9		289461
P26196	Probable ATP-dependent RNA helicase DDX6 OS=Homo sapiens OX=9606 GN=DDX6 PE=1 SV=2	10	1	1	1	3.31	0.67	-0.58	0.899409	34.9	910368	609740			598221	91232.9	505973	609740
Q9HA77	Probable cysteine--tRNA ligase, mitochondrial OS=Homo sapiens OX=9606 GN=CARS2 PE=1 SV=1	3	2	3	2	5.59	0.01	-6.64	4.1949e-17		851858		105916	806792	559773
A0A7I2YQ72	Probable E3 ubiquitin-protein ligase makorin-3 OS=Homo sapiens OX=9606 GN=MKRN3 PE=1 SV=1	19	4	4	4	7.92	0.247	-2.02	0.098368	33.33	742794	183603		341991			145585	146909
P42694	Probable helicase with zinc finger domain OS=Homo sapiens OX=9606 GN=HELZ PE=1 SV=2	1	1	1	1	2.02	0.654	-0.61	0.875531	34.45	772939	410217	165770	380040	393902	498664	260267	392065
A0A0C4DH30	Probable non-functional immunoglobulin heavy variable 3-16 OS=Homo sapiens OX=9606 GN=IGHV3-16 PE=1 SV=1	21	1	1	1	3.02	0.01	-6.64	4.1949e-17		487018		193888	224229	314261
Q93008	Probable ubiquitin carboxyl-terminal hydrolase FAF-X OS=Homo sapiens OX=9606 GN=USP9X PE=1 SV=4	2	2	2	2	5.18	0.744	-0.43	0.946809	71.19	2.34794e+06	1.74607e+06	503555	1249155	1.37521e+06	2.76462e+06	667111	1.74607e+06
Q5VZS7	Programmed cell death protein 4 (Fragment) OS=Homo sapiens OX=9606 GN=PDCD4 PE=1 SV=1	3	1	1	1	1.52	0.01	-6.64	4.1949e-17		44562.3			20517
Q32P28	Prolyl 3-hydroxylase 1 OS=Homo sapiens OX=9606 GN=P3H1 PE=1 SV=2	12	3	3	3	9	0.544	-0.88	0.740273	2.66	605042	329319		273622	404772			329319
A0A0B4J1R2	Propionate--CoA ligase OS=Homo sapiens OX=9606 GN=ACSS3 PE=1 SV=1	6	1	1	1	3.53	0.806	-0.31	0.979208	7.5	254669	205281		117253		134496	137179	205281
H0YKK6	Proteasome activator complex subunit 1 OS=Homo sapiens OX=9606 GN=PSME1 PE=1 SV=1	26	1	1	1	2.63	0.74	-0.43	0.946809	53.25	152078	112508			99933.7		50208.7	159953
D6REN3	Proteasome assembly chaperone 4 OS=Homo sapiens OX=9606 GN=PSMG4 PE=1 SV=1	26	1	1	1	2.14	0.379	-1.4	0.40277	36.22	898099	340139	141669		802380	200175	299089
H0YL69	Proteasome subunit alpha type (Fragment) OS=Homo sapiens OX=9606 GN=PSMA4 PE=1 SV=1	4	1	8	1	18.21	0.736	-0.44	0.946809	0	400271	294401		184289				294401
Q8IVF2	Protein AHNAK2 OS=Homo sapiens OX=9606 GN=AHNAK2 PE=1 SV=2	2	5	5	5	12.35	0.621	-0.69	0.849618	30.23	727306	571071	150907		494004		277148	746576
E5RGG9	Protein argonaute-2 OS=Homo sapiens OX=9606 GN=AGO2 PE=4 SV=1	12	1	1	1	1.53	0.01	-6.64	4.1949e-17		674990		116491	386197
Q9UPA5	Protein bassoon OS=Homo sapiens OX=9606 GN=BSN PE=1 SV=4	1	2	2	2	3.67	0.988	-0.02	0.948512	19.45	1.87652e+06	1.8547e+06	489564	863973	1.07131e+06	1.33322e+06	1.29313e+06	1.8547e+06
Q96NH3	Protein broad-minded OS=Homo sapiens OX=9606 GN=TBC1D32 PE=1 SV=4	1	1	2	1	4.62	0.925	-0.11	0.97815	0	336372	311197			221037	253822
Q13087	Protein disulfide-isomerase A2 OS=Homo sapiens OX=9606 GN=PDIA2 PE=1 SV=2	4	1	1	1	2.22	0.78	-0.36	0.962791	9.85	181691	148494	60663.7	83652.7	116818	121116	85142.8	220581
Q18PE1	Protein Dok-7 OS=Homo sapiens OX=9606 GN=DOK7 PE=1 SV=1	4	1	1	1	2.1	0.54	-0.89	0.730078	21.79	417557	241300		220761	238946	226499	112456	241300
Q03111	Protein ENL OS=Homo sapiens OX=9606 GN=MLLT1 PE=1 SV=2	6	2	2	2	4.29	0.334	-1.58	0.293304	26.68	153264	51237.1		84395.4	84208.1	41790.5
A6NMN3	Protein FAM170B OS=Homo sapiens OX=9606 GN=FAM170B PE=1 SV=1	23	2	3	2	9.91	0.849	-0.24	0.994367	88.55	120822	160480	11252.2		182835	46311.4	101818	185330
Q6UWF9	Protein FAM180A OS=Homo sapiens OX=9606 GN=FAM180A PE=2 SV=1	5	1	1	1	1.53	0.612	-0.71	0.836678	40.29	257600	157571		118602		60068.6	99972.9	216370
Q9ULE4	Protein FAM184B OS=Homo sapiens OX=9606 GN=FAM184B PE=2 SV=3	4	2	2	2	5.51	0.01	-6.64	4.1949e-17		45802.2		14551.8	14170.1	30097.6
A0A1B0GVL4	Protein FAM193A OS=Homo sapiens OX=9606 GN=FAM193A PE=1 SV=1	6	4	4	4	8.71	0.591	-0.76	0.810846	6.8	401122	236952			263585	193265	172454	226562
Q6ZU69	Protein FAM205A OS=Homo sapiens OX=9606 GN=FAM205A PE=2 SV=4	2	2	2	2	3.59	0.01	-6.64	4.1949e-17		402639		86352.7	236948	252219
Q14153	Protein FAM53B OS=Homo sapiens OX=9606 GN=FAM53B PE=1 SV=2	6	1	1	1	2.67	0.604	-0.73	0.8248	54.22	5.04596e+06	3.04614e+06	1.73111e+06	2.32322e+06	2.10599e+06	2.48452e+06	1.93523e+06	2134518
Q14331	Protein FRG1 OS=Homo sapiens OX=9606 GN=FRG1 PE=1 SV=1	6	1	1	1	2.07	0.937	-0.09	0.971356	23.5	312351	292543	66988.9	121011	248843	238607
A0A2R8Y5V8	Protein furry homolog OS=Homo sapiens OX=9606 GN=FRY PE=1 SV=1	2	3	6	3	15.49	0.833	-0.26	0.984661	68.8	659282	762597		238865	550530	621997	425993	1.24295e+06
Q4ZG55	Protein GREB1 OS=Homo sapiens OX=9606 GN=GREB1 PE=2 SV=1	1	1	3	1	6.92	0.962	-0.06	0.958135	53.12	856093	823571	106085	394155	780058	805264	522524	741532
Q99435	Protein kinase C-binding protein NELL2 OS=Homo sapiens OX=9606 GN=NELL2 PE=1 SV=1	3	1	1	1	2.81	0.01	-6.64	4.1949e-17		1.01188e+06		217490		663471
A0A087WVC5	Protein KRBA1 (Fragment) OS=Homo sapiens OX=9606 GN=KRBA1 PE=1 SV=1	5	1	1	1	2.76	0.396	-1.33	0.443788	7.48	513375	203500		236364		165980	159480	193728
Q8N485	Protein limb expression 1 homolog OS=Homo sapiens OX=9606 GN=LIX1 PE=1 SV=2	9	1	1	1	2.71	0.432	-1.21	0.525411	56.62	1.68308e+06	632389	168135	944806	1.10599e+06	722599	333614	632389
K7ELP2	Protein lin-37 homolog (Fragment) OS=Homo sapiens OX=9606 GN=LIN37 PE=1 SV=2	74	1	1	1	2.28	0.482	-1.05	0.648046	18.45	409543	216083	82447.3	240920	269119		119680	247529
Q96KN4	Protein LRATD1 OS=Homo sapiens OX=9606 GN=LRATD1 PE=1 SV=2	10	1	1	1	2.62	0.01	-6.64	4.1949e-17		193066		37866.4	97199.2
Q9Y586	Protein mab-21-like 2 OS=Homo sapiens OX=9606 GN=MAB21L2 PE=1 SV=1	7	1	1	1	2.59	0.725	-0.46	0.942546	25.68	106212	77041.5	27064.2	41158.4		62837.4
Q969L2	Protein MAL2 OS=Homo sapiens OX=9606 GN=MAL2 PE=1 SV=1	13	1	4	1	8.92	0.473	-1.08	0.626351	0	974364	460752		448608			292329
J9JIC5	Protein Njmu-R1 OS=Homo sapiens OX=9606 GN=C17orf75 PE=1 SV=1	9	2	5	2	11.08	0.978	-0.03	0.953569	58.74	1.01483e+06	584591	268961	378098		156020	1.13351e+06
Q9P2P1	Protein NYNRIN OS=Homo sapiens OX=9606 GN=NYNRIN PE=2 SV=3	1	1	1	1	3.26	0.107	-3.23	0.00083623	108.03	3.7598e+06	402068	1.07732e+06	1.73106e+06	801414	74813.4	1.25612e+06	402068
Q9BVG4	Protein PBDC1 OS=Homo sapiens OX=9606 GN=PBDC1 PE=1 SV=1	6	1	1	1	2.25	0.01	-6.64	4.1949e-17		508081			233927
Q96C90	Protein phosphatase 1 regulatory subunit 14B OS=Homo sapiens OX=9606 GN=PPP1R14B PE=1 SV=3	35	1	1	1	3.24	0.01	-6.64	4.1949e-17		2.885e+06			1.39447e+06	1.80582e+06
Q6ZMI0	Protein phosphatase 1 regulatory subunit 21 OS=Homo sapiens OX=9606 GN=PPP1R21 PE=1 SV=1	4	1	1	1	3	0.34	-1.56	0.307885	20.45	290930	98840.7		116736	219362	80617.4
A8MX49	Protein phosphatase 1F OS=Homo sapiens OX=9606 GN=PPM1F PE=1 SV=2	7	1	1	1	3.03	0.492	-1.02	0.67432	63.35	245584	84708.6	52932.6	54259.7	161378	69090.9	48459.2	121506
Q8WYL5	Protein phosphatase Slingshot homolog 1 OS=Homo sapiens OX=9606 GN=SSH1 PE=1 SV=2	4	2	2	2	4.7	0.01	-6.64	4.1949e-17		5.02712e+06			2.31454e+06
Q5THK1	Protein PRR14L OS=Homo sapiens OX=9606 GN=PRR14L PE=1 SV=1	1	1	1	1	2.54	0.442	-1.18	0.556252	15.71	383462	169442			251981	184720	107504	153203
H3BSJ8	Protein regulator of cytokinesis 1 (Fragment) OS=Homo sapiens OX=9606 GN=PRC1 PE=1 SV=1	39	1	1	1	2.58	0.941	-0.09	0.968074	2.57	524177	493385	114183	237608		409564	307573
A0A669KB89	Protein scribble homolog OS=Homo sapiens OX=9606 GN=SCRIB PE=1 SV=1	3	2	2	2	4.64	0.887	-0.17	0.984661	48.41	806824	695595	76757.7	371959	530180	725449	441329	317467
Q8ND04	Protein SMG8 OS=Homo sapiens OX=9606 GN=SMG8 PE=1 SV=1	1	1	3	1	3.5	0.643	-0.64	0.8714	59.28	67819.5	43602.5			44565.6	24081.2	40854.8
Q9Y2G9	Protein strawberry notch homolog 2 OS=Homo sapiens OX=9606 GN=SBNO2 PE=2 SV=3	3	3	3	3	6.09	0.01	-6.64	4.1949e-17		294504		63161.3
Q9UK61	Protein TASOR OS=Homo sapiens OX=9606 GN=TASOR PE=1 SV=3	2	2	2	2	4.65	0.865	-0.21	0.995247	0	892524	771747			586496	629460
E9PDM8	Protein transport protein Sec24D OS=Homo sapiens OX=9606 GN=SEC24D PE=1 SV=1	8	2	5	2	13.08	0.01	-6.64	4.1949e-17		691018		152251		442001
K7EJU3	Protein unc-119 homolog A OS=Homo sapiens OX=9606 GN=UNC119 PE=1 SV=1	10	1	1	1	2.29	0.01	-6.64	4.1949e-17		571040		123917		370857
P56704	Protein Wnt-3a OS=Homo sapiens OX=9606 GN=WNT3A PE=1 SV=2	7	1	1	1	2.94	0.01	-6.64	4.1949e-17		355318		73738.8	163593	284310
Q6ZMS7	Protein ZNF783 OS=Homo sapiens OX=9606 GN=ZNF783 PE=1 SV=1	11	1	1	1	2.73	0.651	-0.62	0.875485	0	188673	122780			123981			122780
Q6V0I7	Protocadherin Fat 4 OS=Homo sapiens OX=9606 GN=FAT4 PE=1 SV=2	1	4	4	4	9.08	0.529	-0.92	0.727206	4.58	481310	342462	76809.7		425049		224102	332035
Q9Y5G6	Protocadherin gamma-A7 OS=Homo sapiens OX=9606 GN=PCDHGA7 PE=2 SV=1	4	2	4	2	11.5	0.046	-4.45	7.45259e-07	29.63	2.95187e+06	135515		1.33269e+06	1978141		70223.6	165920
J3QL21	Proton-coupled folate transporter (Fragment) OS=Homo sapiens OX=9606 GN=SLC46A1 PE=1 SV=1	18	1	1	1	2.67	0.269	-1.89	0.13876	26.94	177137	47699.3		81556.1		32471.8	36258.9
Q96PZ0	Pseudouridylate synthase 7 homolog OS=Homo sapiens OX=9606 GN=PUS7 PE=1 SV=2	9	2	2	2	5.66	0.352	-1.51	0.333235	97.45	1.10349e+06	387983	220165		779461	141927	720180	387983
A0A0A0MTC9	Pulmonary surfactant-associated protein C OS=Homo sapiens OX=9606 GN=SFTPC PE=1 SV=1	12	1	1	1	2.95	0.01	-6.64	4.1949e-17		90716		30399.9		38150.6
H0YEH2	Pumilio homolog 1 (Fragment) OS=Homo sapiens OX=9606 GN=PUM1 PE=1 SV=1	1	1	1	1	1.54	0.756	-0.4	0.953569	0	423688	320485			278414	261397
Q5VUR7	Putative ankyrin repeat domain-containing protein 20A3 OS=Homo sapiens OX=9606 GN=ANKRD20A3P PE=5 SV=1	1	1	2	1	4.38	0.6	-0.74	0.821075	41.1	777722	466611	386959	358072	369400	380582	296049	434828
Q58FG0	Putative heat shock protein HSP 90-alpha A5 OS=Homo sapiens OX=9606 GN=HSP90AA5P PE=2 SV=1	8	1	1	1	2.79	0.01	-6.64	4.1949e-17		1.02003e+06		218762
Q9BVR0	Putative HERC2-like protein 3 OS=Homo sapiens OX=9606 GN=HERC2P3 PE=5 SV=2	3	2	2	1	4.16	0.307	-1.71	0.223031	10.64	951736	291786		438190			198894	271589
H0YC96	Putative lipoyltransferase 2, mitochondrial (Fragment) OS=Homo sapiens OX=9606 GN=LIPT2 PE=1 SV=1	31	1	1	1	2.54	0.822	-0.28	0.979616	44.34	96491.9	79343.7	69683.7	44426	44444.6			79343.7
F8WES3	Putative transporter SVOPL OS=Homo sapiens OX=9606 GN=SVOPL PE=4 SV=1	10	1	1	1	2.65	0.71	-0.49	0.930603	96.69	1.64457e+06	811484	85242.7	757180	1.30814e+06	661871	896910	691855
Q8NAA6	Putative uncharacterized protein encoded by LINC02694 OS=Homo sapiens OX=9606 GN=LINC02694 PE=5 SV=1	4	1	1	1	1.67	0.01	-6.64	4.1949e-17		1.31062e+06			603423
A8MUI8	Putative UPF0607 protein ENSP00000383783 OS=Homo sapiens OX=9606 PE=3 SV=2	15	2	3	1	4.8	0.104	-3.26	0.000694002	0	2.35231e+06	244903		1.08303e+06				244903
Q49A33	Putative zinc finger protein 876 OS=Homo sapiens OX=9606 GN=ZNF876P PE=5 SV=3	11	1	1	1	2.7	0.982	-0.03	0.953288	5.83	473555	467622		209588	323717	368976	303586	467622
P08559	Pyruvate dehydrogenase E1 component subunit alpha, somatic form, mitochondrial OS=Homo sapiens OX=9606 GN=PDHA1 PE=1 SV=3	4	1	1	1	2.05	0.783	-0.35	0.964506	35.15	3.66888e+06	2.87148e+06	1.06006e+06	1.68919e+06	1832817	2.34206e+06	2.09771e+06	2861385
P24386	Rab proteins geranylgeranyltransferase component A 1 OS=Homo sapiens OX=9606 GN=CHM PE=1 SV=3	10	2	2	2	6.41	0.9	-0.15	0.979208	55.23	282310	311224	60546.1	107528	336762		307207	200042
F8VP47	Rabphilin-3A OS=Homo sapiens OX=9606 GN=RPH3A PE=1 SV=1	3	1	2	1	4.59	0.01	-6.64	4.1949e-17		219605			116639	125092
O60518	Ran-binding protein 6 OS=Homo sapiens OX=9606 GN=RANBP6 PE=1 SV=2	6	2	2	2	2.93	0.752	-0.41	0.953288	0	317904	239123		146367			151714
Q5JUE9	Rap guanine nucleotide exchange factor 1 (Fragment) OS=Homo sapiens OX=9606 GN=RAPGEF1 PE=1 SV=1	18	2	2	1	5.03	0.484	-1.05	0.655259	39.04	975229	472041	288987		463809		427659	330572
Q13905	Rap guanine nucleotide exchange factor 1 OS=Homo sapiens OX=9606 GN=RAPGEF1 PE=1 SV=3	4	3	3	2	6.83	0.819	-0.29	0.979208	48.96	438076	394988	103334	177208	287869	78378.1	275281	394988
A0A0A0MQY8	Rap1 GTPase-activating protein 1 OS=Homo sapiens OX=9606 GN=RAP1GAP PE=1 SV=1	2	1	1	1	1.55	0.01	-6.64	4.1949e-17		762514		163534
A0A3B3ITT1	Ras-related protein Rab-12 OS=Homo sapiens OX=9606 GN=RAB12 PE=1 SV=1	10	2	3	2	8.01	0.906	-0.14	0.979208	17.08	1.76162e+06	1.56748e+06		866226	1.08388e+06	1.62214e+06	903971	1.56748e+06
P62820	Ras-related protein Rab-1A OS=Homo sapiens OX=9606 GN=RAB1A PE=1 SV=3	9	1	2	1	2.26	0.347	-1.53	0.322191	26.96	829636	287690	177929			281174		240087
P10301	Ras-related protein R-Ras OS=Homo sapiens OX=9606 GN=RRAS PE=1 SV=1	14	1	1	1	3.02	0.01	-6.64	4.1949e-17		113124			52083.5
Q8TDY2	RB1-inducible coiled-coil protein 1 OS=Homo sapiens OX=9606 GN=RB1CC1 PE=1 SV=3	4	2	2	2	6.17	0.543	-0.88	0.738527	55.3	78619.4	42707.9		52133.8	35870	34833.8
A0A499FJI4	RCR-type E3 ubiquitin transferase OS=Homo sapiens OX=9606 GN=MYCBP2 PE=1 SV=1	1	2	2	2	4.66	0.931	-0.1	0.974997	34.65	3.41772e+06	3.50382e+06	732989	2.13729e+06	1.41928e+06	2.85782e+06	2.2665e+06	2.01121e+06
A0A1W2PQA1	RE1-silencing transcription factor OS=Homo sapiens OX=9606 GN=REST PE=1 SV=2	2	1	1	1	2.54	0.735	-0.44	0.946809	10.8	585877	430729			384992	351315	294760	350328
A0A2R8YD64	Receptor expression-enhancing protein (Fragment) OS=Homo sapiens OX=9606 GN=REEP1 PE=1 SV=1	6	1	1	1	2.29	0.537	-0.9	0.729182	36.69	384486	206499		177022		131828	167388
A0A087WWD6	Receptor-type tyrosine-protein phosphatase T OS=Homo sapiens OX=9606 GN=PTPRT PE=1 SV=1	5	1	1	1	2.03	0.344	-1.54	0.315329	16.67	1.37618e+06	473026	330196	566352				473026
P49796	Regulator of G-protein signaling 3 OS=Homo sapiens OX=9606 GN=RGS3 PE=1 SV=2	2	2	2	2	3.61	0.01	-6.64	4.1949e-17		698587		149824
P49758	Regulator of G-protein signaling 6 OS=Homo sapiens OX=9606 GN=RGS6 PE=1 SV=5	6	1	2	1	5.58	0.459	-1.12	0.588891	8.5	1.25838e+06	577220	282984	552548		443337	388909
E9PBG5	Regulator of G-protein-signaling 12 OS=Homo sapiens OX=9606 GN=RGS12 PE=1 SV=1	5	2	2	2	4.88	0.744	-0.43	0.946809	71.19	2.34794e+06	1.74607e+06	503555	1249155	1.37521e+06	2.76462e+06	667111	1.74607e+06
P35251	Replication factor C subunit 1 OS=Homo sapiens OX=9606 GN=RFC1 PE=1 SV=4	6	4	7	4	16.04	0.506	-0.98	0.68923	68.92	1.76501e+06	892249	436911		1.00487e+06	321320	566098	1928774
Q6IQ49	Replication stress response regulator SDE2 OS=Homo sapiens OX=9606 GN=SDE2 PE=1 SV=1	5	1	1	1	2.67	0.01	-6.64	4.1949e-17		2.19968e+06			1.01276e+06
Q5VY30	Retinol-binding protein OS=Homo sapiens OX=9606 GN=RBP4 PE=1 SV=2	46	5	21	5	82.77	0.811	-0.3	0.979208	30.59	4.60859e+06	3.19275e+06	1.17135e+06	2.12185e+06	2.55215e+06	2.23767e+06	2.16865e+06	3.19275e+06
Q9P2F6	Rho GTPase-activating protein 20 OS=Homo sapiens OX=9606 GN=ARHGAP20 PE=1 SV=2	2	1	2	1	5.25	0.714	-0.49	0.933028	15.06	1.45808e+07	1.04822e+07	2.84107e+06	6.71319e+06	10628498	9417926	6650547	7126277
A0A087WW76	Rho GTPase-activating protein 21 OS=Homo sapiens OX=9606 GN=ARHGAP21 PE=1 SV=1	3	3	3	3	5.55	0.01	-6.64	4.1949e-17		754078		83702.1	370942	495520
D6RCP5	Rho GTPase-activating protein 24 (Fragment) OS=Homo sapiens OX=9606 GN=ARHGAP24 PE=1 SV=1	6	1	1	1	3.07	0.01	-6.64	4.1949e-17		669176				439729
E7EV07	Rho guanine nucleotide exchange factor 4 OS=Homo sapiens OX=9606 GN=ARHGEF4 PE=1 SV=3	2	2	2	2	4.86	0.984	-0.02	0.952713	116.65	531535	523101	51371.2		775085	379641	372989
Q8TER5	Rho guanine nucleotide exchange factor 40 OS=Homo sapiens OX=9606 GN=ARHGEF40 PE=1 SV=3	3	2	2	2	5.19	0.01	-6.64	4.1949e-17		754078		83702.1	370942	495520
E9PJ62	Ribonucleoside-diphosphate reductase large subunit OS=Homo sapiens OX=9606 GN=RRM1 PE=1 SV=1	32	1	1	1	3.15	0.701	-0.51	0.923399	27.67	1.60084e+06	1.12197e+06	177376	874578	1051944	915112	792903	660682
H0YAV1	Ribonucleoside-diphosphate reductase subunit M2 B (Fragment) OS=Homo sapiens OX=9606 GN=RRM2B PE=1 SV=1	7	1	1	1	2.54	0.772	-0.37	0.958135	26.65	372217	287289		213828	196028		226243	231457
A0A7I2V5R7	Ribosomal biogenesis protein LAS1L OS=Homo sapiens OX=9606 GN=LAS1L PE=1 SV=1	4	1	1	1	2.82	0.622	-0.69	0.849618	10.45	559082	347502	111750	276192		283433
P23443	Ribosomal protein S6 kinase beta-1 OS=Homo sapiens OX=9606 GN=RPS6KB1 PE=1 SV=2	9	3	3	3	6.29	0.372	-1.43	0.387015	39.63	282173	104933		95725.3	251649		77255.5	90427.3
F2Z2J1	Ribosomal protein S6 kinase OS=Homo sapiens OX=9606 GN=RPS6KA2 PE=1 SV=1	2	1	2	1	4.47	0.383	-1.38	0.40893	18.72	668530	269694	163708		384749	219970	188247	220926
Q96EU6	Ribosomal RNA processing protein 36 homolog OS=Homo sapiens OX=9606 GN=RRP36 PE=1 SV=1	7	1	1	1	2.03	0.853	-0.23	0.995247	23.13	327947	279852		145525	223594	268178		238191
Q9P2E9	Ribosome-binding protein 1 OS=Homo sapiens OX=9606 GN=RRBP1 PE=1 SV=5	5	4	4	4	9.14	0.01	-6.64	4.1949e-17		438115		113621	166811
Q9H0A6	RING finger protein 32 OS=Homo sapiens OX=9606 GN=RNF32 PE=1 SV=1	2	1	1	1	1.53	0.663	-0.59	0.888936	58.36	54838.8	38045.5	19395.7	25248.4	31177	19603.9	38062.1	38045.5
Q9Y2P8	RNA 3'-terminal phosphate cyclase-like protein OS=Homo sapiens OX=9606 GN=RCL1 PE=1 SV=3	6	1	1	1	2.56	0.814	-0.3	0.979208	10.08	690535	561881	161133	317930	422913		356492
I3L352	RNA helicase (Fragment) OS=Homo sapiens OX=9606 GN=DDX19A PE=1 SV=1	5	1	3	1	6.39	0.01	-6.64	4.1949e-17		1.37416e+06		294711
H3BPM3	RNA polymerase II-associated protein 1 (Fragment) OS=Homo sapiens OX=9606 GN=RPAP1 PE=1 SV=1	11	1	1	1	2.28	0.01	-6.64	4.1949e-17		201499		36211.5	135027	132409
A0A6Q8PG18	RNA-binding E3 ubiquitin-protein ligase MEX3C (Fragment) OS=Homo sapiens OX=9606 GN=MEX3C PE=1 SV=1	9	2	2	2	4.73	0.744	-0.43	0.946809	31.24	464302	345669	78343.4	213770	369381		219314
Q8N7X1	RNA-binding motif protein, X-linked-like-3 OS=Homo sapiens OX=9606 GN=RBMXL3 PE=2 SV=2	5	2	2	2	5.31	0.334	-1.58	0.2934	36.62	2.2102e+06	841425	645734	1.0176e+06	834594	686291	621117	679759
Q5T8P6	RNA-binding protein 26 OS=Homo sapiens OX=9606 GN=RBM26 PE=1 SV=3	2	1	1	1	2.81	0.389	-1.36	0.422695	105.88	888346	345583		794708	300433	281868
Q6ZP01	RNA-binding protein 44 OS=Homo sapiens OX=9606 GN=RBM44 PE=2 SV=3	3	2	2	2	3.61	0.686	-0.54	0.916526	31.51	895178	666111	191986	65488.9	1.32526e+06	568769	77499.8	666111
H7BYM9	RNA-binding protein 5 (Fragment) OS=Homo sapiens OX=9606 GN=RBM5 PE=4 SV=1	14	1	1	1	1.84	0.01	-6.64	4.1949e-17		839509		152785	455487
P78332	RNA-binding protein 6 OS=Homo sapiens OX=9606 GN=RBM6 PE=1 SV=5	3	3	3	3	5.2	0.376	-1.41	0.398289	3.47	566926	213429			372539	126863	138655	213429
A1L020	RNA-binding protein MEX3A OS=Homo sapiens OX=9606 GN=MEX3A PE=1 SV=1	5	1	2	1	5.43	0.546	-0.87	0.742176	30.96	6.66162e+06	3.56727e+06	348140	3067087	5.1899e+06	3.51717e+06	2263300	3.40397e+06
Q96T51	RUN and FYVE domain-containing protein 1 OS=Homo sapiens OX=9606 GN=RUFY1 PE=1 SV=2	1	1	3	1	5.69	0.746	-0.42	0.946809	31.08	117333	87514.5	24287.1		79885.2	34956.1	70296.8	87514.5
Q92736	Ryanodine receptor 2 OS=Homo sapiens OX=9606 GN=RYR2 PE=1 SV=3	2	5	6	4	14.71	0.252	-1.99	0.106056	11.65	363468	91633.5		154707	258354	74739
Q9NWH9	SAFB-like transcription modulator OS=Homo sapiens OX=9606 GN=SLTM PE=1 SV=2	5	3	3	3	6.03	0.416	-1.26	0.483935	45.67	159944	51502.5	48697.4		74034.8	36500.2	32676.3	98989.3
Q93084	Sarcoplasmic/endoplasmic reticulum calcium ATPase 3 OS=Homo sapiens OX=9606 GN=ATP2A3 PE=1 SV=3	5	3	3	3	6.65	0.793	-0.33	0.974997	58.91	488515	387623			321013	465834	166911
A0A2R8Y5N3	SCAN domain-containing protein 3 OS=Homo sapiens OX=9606 GN=ZBED9 PE=1 SV=1	2	1	1	1	2.23	0.638	-0.65	0.866175	56.91	1.11289e+06	709679			731299	578836	234967	1151756
B7Z5N7	Sec1 family domain-containing protein 1 OS=Homo sapiens OX=9606 GN=SCFD1 PE=1 SV=1	11	2	3	2	9.27	0.148	-2.76	0.00681659	28.44	877291	129705	188150	575459	465909		82292.9
Q92503	SEC14-like protein 1 OS=Homo sapiens OX=9606 GN=SEC14L1 PE=1 SV=2	3	1	1	1	2.2	0.458	-1.13	0.588811	26.01	861314	415459		436948	513669	338861	288820	276058
O14828	Secretory carrier-associated membrane protein 3 OS=Homo sapiens OX=9606 GN=SCAMP3 PE=1 SV=3	10	2	2	2	4.1	0.563	-0.83	0.775404	18.35	484597	272894	110854	209179		253891		239240
Q969E2	Secretory carrier-associated membrane protein 4 OS=Homo sapiens OX=9606 GN=SCAMP4 PE=1 SV=1	10	1	1	1	2.82	0.01	-6.64	4.1949e-17		776952		228052	357718	224904
H7C280	Selenocysteine lyase (Fragment) OS=Homo sapiens OX=9606 GN=SCLY PE=1 SV=1	12	1	1	1	2.19	0.962	-0.06	0.958135	22.12	607632	584796	151201	241120			371031
J3KNL2	Septin OS=Homo sapiens OX=9606 GN=SEPTIN1 PE=1 SV=2	14	4	4	4	9.93	0.9	-0.15	0.979208	10.36	4.80179e+07	43211656	10298258	23653582	24242456	27371358	28808372	43211656
C9JFA1	Serine/threonine-protein kinase 25 (Fragment) OS=Homo sapiens OX=9606 GN=STK25 PE=1 SV=1	17	1	1	1	2.3	0.01	-6.64	4.1949e-17		1.15695e+06			690564	586432
E9PRU7	Serine/threonine-protein kinase Chk1 OS=Homo sapiens OX=9606 GN=CHEK1 PE=4 SV=2	21	1	2	1	5.41	0.536	-0.9	0.729182	8.93	182846	97944.1		89582.6	112912		64188.2	94821.5
H7C175	Serine/threonine-protein kinase LMTK1 OS=Homo sapiens OX=9606 GN=AATK PE=1 SV=2	3	3	4	3	7.47	0.884	-0.18	0.985899	9.92	536231	484280	187210	246887	351446	385796	322460	484280
A0A3B3IRV9	Serine/threonine-protein kinase LMTK3 OS=Homo sapiens OX=9606 GN=LMTK3 PE=1 SV=2	21	1	2	1	5.56	0.535	-0.9	0.729182	57.93	833062	445428	122006	561669				445428
Q7KZI7	Serine/threonine-protein kinase MARK2 OS=Homo sapiens OX=9606 GN=MARK2 PE=1 SV=2	5	3	3	3	6.64	0.509	-0.97	0.697192	62.62	1.97951e+06	1.19241e+06	990896	911391	889652	561813	1.07154e+06	1.19241e+06
Q5VT25	Serine/threonine-protein kinase MRCK alpha OS=Homo sapiens OX=9606 GN=CDC42BPA PE=1 SV=1	3	2	2	2	5.38	0.314	-1.67	0.236771	100.26	1.88635e+06	598929	481040	747700	1.23956e+06		787368	289053
P42345	Serine/threonine-protein kinase mTOR OS=Homo sapiens OX=9606 GN=MTOR PE=1 SV=1	2	3	3	3	6.3	0.515	-0.96	0.707503	20.48	145566	75038.6			95654.6	53774.8	89199.9	75038.6
Q96J92	Serine/threonine-protein kinase WNK4 OS=Homo sapiens OX=9606 GN=WNK4 PE=1 SV=1	2	1	4	1	10.57	0.661	-0.6	0.885559	22.66	1.58474e+07	1.04822e+07	3.39875e+06	7.16573e+06	11733497	1.00917e+07	6650547	8.15133e+06
M0R0K6	Serine/threonine-protein phosphatase 2A 65 kDa regulatory subunit A alpha isoform OS=Homo sapiens OX=9606 GN=PPP2R1A PE=1 SV=1	42	1	3	1	8.48	0.747	-0.42	0.947503	24.61	805558	601769		355999	551488	93996.5	381800	722158
P62714	Serine/threonine-protein phosphatase 2A catalytic subunit beta isoform OS=Homo sapiens OX=9606 GN=PPP2CB PE=1 SV=1	13	2	3	2	6.66	0.01	-6.64	4.1949e-17		559042			280896	336616
Q6NUP7	Serine/threonine-protein phosphatase 4 regulatory subunit 4 OS=Homo sapiens OX=9606 GN=PPP4R4 PE=1 SV=1	9	3	3	3	7.52	0.593	-0.75	0.810846	39.73	715858	424739	144673		499196	458673		320800
D6RAM6	Serine-rich coiled-coil domain-containing protein 1 (Fragment) OS=Homo sapiens OX=9606 GN=CCSER1 PE=3 SV=1	33	1	1	1	2.06	0.53	-0.92	0.727206	6.94	1.02007e+06	558523	314462	469652	668025	455548	327812	777416
Q9H7U1	Serine-rich coiled-coil domain-containing protein 2 OS=Homo sapiens OX=9606 GN=CCSER2 PE=1 SV=2	9	4	6	4	15.14	0.919	-0.12	0.979208	101.75	286514	285308		330344	75182.3	139241	257795	285308
A0A7I2V4X1	SET-binding protein OS=Homo sapiens OX=9606 GN=SETBP1 PE=1 SV=1	2	2	2	2	3.87	0.337	-1.57	0.301923	3.77	1.32258e+06	446018	290961		847254	363786
Q15464	SH2 domain-containing adapter protein B OS=Homo sapiens OX=9606 GN=SHB PE=1 SV=2	7	1	3	1	9.11	0.555	-0.85	0.759387	12.21	1.50853e+06	836576		642072	1.0723e+06		580142	765390
Q5VZ18	SH2 domain-containing adapter protein E OS=Homo sapiens OX=9606 GN=SHE PE=1 SV=1	3	1	2	1	3.17	0.331	-1.59	0.285088	0	210126	69633.6	45065			56795.2
Q5TCZ1	SH3 and PX domain-containing protein 2A OS=Homo sapiens OX=9606 GN=SH3PXD2A PE=1 SV=1	1	1	1	1	2.2	0.01	-6.64	4.1949e-17		663109		164416		376904
Q9H0F6	Sharpin OS=Homo sapiens OX=9606 GN=SHARPIN PE=1 SV=1	5	1	1	1	2.67	0.414	-1.27	0.483935	20.59	411099	197621	88167.2	170918	333104	122890	133137	197621
A0A087WVB7	Short stature homeobox protein 2 (Fragment) OS=Homo sapiens OX=9606 GN=SHOX2 PE=4 SV=6	18	2	2	2	3.95	0.86	-0.22	0.999805	17.4	3.92064e+07	32984946	9191517	18051088	21621484	23632440	23383996	32984946
Q9UQ49	Sialidase-3 OS=Homo sapiens OX=9606 GN=NEU3 PE=1 SV=1	2	1	1	1	2	0.206	-2.28	0.0425089	31.06	766940	158301	202514	286798		129115
E9PR25	Sialidase-3 OS=Homo sapiens OX=9606 GN=NEU3 PE=1 SV=1	13	1	1	1	2.21	0.01	-6.64	4.1949e-17		252811		95009.2	66425.1
Q96NB2	Sideroflexin-2 OS=Homo sapiens OX=9606 GN=SFXN2 PE=1 SV=2	6	1	1	1	2.25	0.01	-6.64	4.1949e-17		358346		76853.5	274514	220269
A0A1P0AYU5	Sidoreflexin OS=Homo sapiens OX=9606 GN=SFXN3 PE=1 SV=1	10	1	2	1	6.62	0.64	-0.64	0.867986	74.25	192289	199811		42115.1	265620	57600.4	126773	214394
P37108	Signal recognition particle 14 kDa protein OS=Homo sapiens OX=9606 GN=SRP14 PE=1 SV=2	9	1	1	1	2.03	0.769	-0.38	0.958135	12.4	1.15145e+06	885945	279026	530142	673403	761784	562098	860433
Q92783	Signal transducing adapter molecule 1 OS=Homo sapiens OX=9606 GN=STAM PE=1 SV=3	1	1	1	1	1.63	0.01	-6.64	4.1949e-17		33938		7896.47		20556.3
O60292	Signal-induced proliferation-associated 1-like protein 3 OS=Homo sapiens OX=9606 GN=SIPA1L3 PE=1 SV=3	2	2	2	2	5.31	0.01	-6.64	4.1949e-17		680296			313216
A6NFE2	Single-pass membrane and coiled-coil domain-containing protein 2 OS=Homo sapiens OX=9606 GN=SMCO2 PE=2 SV=2	8	1	1	1	2.73	0.01	-6.64	4.1949e-17		535421				351836
Q1XH10	SKI/DACH domain-containing protein 1 OS=Homo sapiens OX=9606 GN=SKIDA1 PE=1 SV=2	3	2	2	2	4.22	0.579	-0.79	0.795198	10.97	463630	268525		229839	282950		170369
Q96PX8	SLIT and NTRK-like protein 1 OS=Homo sapiens OX=9606 GN=SLITRK1 PE=1 SV=2	9	2	2	2	5.53	0.115	-3.12	0.00137571	127.2	1.77272e+06	630494	2905147	816182	511884	73035.3	542273	630494
Q8IW52	SLIT and NTRK-like protein 4 OS=Homo sapiens OX=9606 GN=SLITRK4 PE=1 SV=1	5	2	2	2	5.13	0.928	-0.11	0.977165	10.3	2.11054e+07	1.92539e+07	4.14244e+06	9717152	1.39098e+07	1.76752e+07	12215884	1.91604e+07
O94991	SLIT and NTRK-like protein 5 OS=Homo sapiens OX=9606 GN=SLITRK5 PE=1 SV=2	3	1	1	1	2.63	0.01	-6.64	4.1949e-17		625263		60136.1		916211
Q5T0V2	Slit homolog 1 protein OS=Homo sapiens OX=9606 GN=SLIT1 PE=1 SV=1	8	2	9	2	20.17	0.613	-0.71	0.837433	18.69	709570	434981	188861	326694	392318	330376	296367
Q7Z6B7	SLIT-ROBO Rho GTPase-activating protein 1 OS=Homo sapiens OX=9606 GN=SRGAP1 PE=1 SV=1	3	2	3	2	6.35	0.8	-0.32	0.978427	11.08	2.31502e+06	1.85179e+06	522429	1.06586e+06	1141573	1.22499e+06	1.17489e+06	1.92889e+06
A0A087WYJ0	Small conductance calcium-activated potassium channel protein 3 OS=Homo sapiens OX=9606 GN=KCNN3 PE=1 SV=1	4	1	1	1	2.56	0.925	-0.11	0.977947	8.17	951798	885851	193134		661052	722527	603325	815986
P14678	Small nuclear ribonucleoprotein-associated proteins B and B' OS=Homo sapiens OX=9606 GN=SNRPB PE=1 SV=2	12	1	1	1	2.54	0.915	-0.13	0.979208	44.59	1.38864e+06	1.2708e+06	212220	897226			702101	1.45936e+06
Q13126	S-methyl-5'-thioadenosine phosphorylase OS=Homo sapiens OX=9606 GN=MTAP PE=1 SV=2	4	1	1	1	1.53	0.594	-0.75	0.810846	0	955785	567727			628066		360201
Q2TAL5	Smoothelin-like protein 2 OS=Homo sapiens OX=9606 GN=SMTNL2 PE=2 SV=1	3	2	4	2	8.11	0.01	-6.64	4.1949e-17		436496		64595.1	291251
Q8NBS3	Sodium bicarbonate transporter-like protein 11 OS=Homo sapiens OX=9606 GN=SLC4A11 PE=1 SV=2	2	1	1	1	2.68	0.252	-1.99	0.105626	22.9	795681	193503		341071	561596	264207	114056	193503
P19634	Sodium/hydrogen exchanger 1 OS=Homo sapiens OX=9606 GN=SLC9A1 PE=1 SV=2	9	2	2	2	6.22	0.202	-2.31	0.0380238	6.93	683547	137998	153611	300344			87554.4
P53794	Sodium/myo-inositol cotransporter OS=Homo sapiens OX=9606 GN=SLC5A3 PE=1 SV=2	11	3	4	3	10.69	0.556	-0.85	0.761329	95.43	651189	362249			427910	829174	229834	214616
A0A6Q8PH17	Sodium/potassium-transporting ATPase subunit beta-1-interacting protein 3 OS=Homo sapiens OX=9606 GN=NKAIN3 PE=1 SV=1	6	1	1	1	2.26	0.47	-1.09	0.620938	12.24	328094	154072			215597	125666	106549	129846
H7BZY1	Sodium-dependent phosphate transporter 1 (Fragment) OS=Homo sapiens OX=9606 GN=SLC20A1 PE=3 SV=1	17	1	1	1	2.48	0.981	-0.03	0.953569	15.06	929713	912328	220544	382026	610933	744122	525467	984454
Q99884	Sodium-dependent proline transporter OS=Homo sapiens OX=9606 GN=SLC6A7 PE=2 SV=2	9	2	2	2	5.84	0.521	-0.94	0.721414	49.97	1.73537e+06	854726	90860.4	798987	1.31734e+06	552071	663300	854726
P46721	Solute carrier organic anion transporter family member 1A2 OS=Homo sapiens OX=9606 GN=SLCO1A2 PE=2 SV=1	6	1	1	1	3.01	0.746	-0.42	0.94683	2.81	423796	316274	89169.3	266731	278485			316274
O94875	Sorbin and SH3 domain-containing protein 2 OS=Homo sapiens OX=9606 GN=SORBS2 PE=1 SV=3	3	2	4	1	11.47	0.381	-1.39	0.404642	77.44	788772	300577	86678	708762			262757	218153
Q13596	Sorting nexin-1 OS=Homo sapiens OX=9606 GN=SNX1 PE=1 SV=3	2	1	5	1	12.92	0.389	-1.36	0.422695	73.39	953422	370858	312824	438967	321756	307627	235295	191819
Q9HB58	Sp110 nuclear body protein OS=Homo sapiens OX=9606 GN=SP110 PE=1 SV=5	2	1	2	1	6.24	0.509	-0.97	0.697192	62.62	1.97951e+06	1.19241e+06	990896	911391	889652	561813	1.07154e+06	1.19241e+06
A0A2R8Y4I8	Spastin OS=Homo sapiens OX=9606 GN=SPAST PE=1 SV=1	7	2	2	2	4.87	0.124	-3.01	0.00225182	0.08	2.59135e+06	321148		1.19309e+06		217869	203756	321319
C9JW67	SPATS2-like protein (Fragment) OS=Homo sapiens OX=9606 GN=SPATS2L PE=1 SV=1	5	1	1	1	1.83	0.699	-0.52	0.922539	24.08	130453	91220		58123.2	88583.3		48973.1	107802
C9JY79	Spectrin beta chain OS=Homo sapiens OX=9606 GN=SPTBN4 PE=1 SV=2	2	3	3	3	6.52	0.805	-0.31	0.979208	44.05	884918	661463		293772	806466	539509	403527	798375
P11277	Spectrin beta chain, erythrocytic OS=Homo sapiens OX=9606 GN=SPTB PE=1 SV=5	2	2	4	2	9.06	0.697	-0.52	0.922193	25.65	1.75348e+06	733794	352490		1.2293e+06	598504
Q01082	Spectrin beta chain, non-erythrocytic 1 OS=Homo sapiens OX=9606 GN=SPTBN1 PE=1 SV=2	4	4	4	4	10.37	0.887	-0.17	0.984661	51.89	281434	235156	76757.7	64055.2	184936	149458	149198	317467
O15020	Spectrin beta chain, non-erythrocytic 2 OS=Homo sapiens OX=9606 GN=SPTBN2 PE=1 SV=3	4	4	4	4	10.66	0.339	-1.56	0.306751	20.03	270295	97957.9	66933.3	107781		68307.9	62150.6	100444
F8WB32	Sperm-associated antigen 16 protein OS=Homo sapiens OX=9606 GN=SPAG16 PE=1 SV=1	53	1	1	1	2.65	0.877	-0.19	0.988424	22.25	125839	110415			82691.5	104583	60324.8
I3L4C3	Sperm-associated antigen 7 OS=Homo sapiens OX=9606 GN=SPAG7 PE=1 SV=1	20	2	2	2	3.61	0.568	-0.82	0.779823	15.85	438414	248964			288091	182506		277006
Q9BXB7	Spermatogenesis-associated protein 16 OS=Homo sapiens OX=9606 GN=SPATA16 PE=2 SV=3	6	1	1	1	2.81	0.24	-2.06	0.0860725	94.48	802362	155727		277058	703009	109047	436659	155727
Q9P0W8	Spermatogenesis-associated protein 7 OS=Homo sapiens OX=9606 GN=SPATA7 PE=1 SV=3	6	1	1	1	0	0.62	-0.69	0.849173	8.06	452205	280484	615263	196887	297153	228771
H0YAZ7	Sperm-tail PG-rich repeat-containing protein 2 (Fragment) OS=Homo sapiens OX=9606 GN=STPG2 PE=4 SV=1	16	2	2	2	4.78	0.837	-0.26	0.98737	57.35	734784	1.48284e+06	149957	338303	764118	1.53461e+06	744839	1.48284e+06
Q96BD8	Spindle and kinetochore-associated protein 1 OS=Homo sapiens OX=9606 GN=SKA1 PE=1 SV=1	8	1	1	1	2.69	0.788	-0.34	0.970962	48.66	353049	278100			231996	226827	262650	169647
F8VWW7	SPRY domain-containing protein 3 OS=Homo sapiens OX=9606 GN=SPRYD3 PE=1 SV=1	5	1	1	1	3.03	0.822	-0.28	0.979208	68.64	1.69302e+06	1.19324e+06	107282	779484	1.35298e+06	973244	1.07367e+06	765550
Q15020	Squamous cell carcinoma antigen recognized by T-cells 3 OS=Homo sapiens OX=9606 GN=SART3 PE=1 SV=1	3	1	1	1	2.69	0.571	-0.81	0.781002	58.13	119473	68188.6		55006.9		37932.7	63431.9
Q9P2P6	StAR-related lipid transfer protein 9 OS=Homo sapiens OX=9606 GN=STARD9 PE=1 SV=3	2	4	4	4	9.23	0.472	-1.08	0.624998	80.09	563168	205942	61689.2	353073	370069	167973	366887	135811
Q9H2G2	STE20-like serine/threonine-protein kinase OS=Homo sapiens OX=9606 GN=SLK PE=1 SV=1	5	3	6	3	16.22	0.708	-0.5	0.930603	14.6	730426	516880			479978	382095		570298
F8WEH8	Sterol regulatory element-binding protein cleavage-activating protein OS=Homo sapiens OX=9606 GN=SCAP PE=1 SV=2	5	1	1	1	2.54	0.608	-0.72	0.829812	4.92	383706	233106	79605.3	182626				233106
A6NHR9	Structural maintenance of chromosomes flexible hinge domain-containing protein 1 OS=Homo sapiens OX=9606 GN=SMCHD1 PE=1 SV=2	1	1	5	1	12.33	0.877	-0.19	0.988424	21.29	646493	567179	158563	201641	424824	462608	380039	565351
Q8NDV3	Structural maintenance of chromosomes protein 1B OS=Homo sapiens OX=9606 GN=SMC1B PE=2 SV=2	6	3	3	3	8.38	0.996	-0.01	0.946809	23.84	278662	253190		111298	211087	277004	160639	228883
O95347	Structural maintenance of chromosomes protein 2 OS=Homo sapiens OX=9606 GN=SMC2 PE=1 SV=2	2	2	4	2	9.44	0.846	-0.24	0.991012	24.87	3.72752e+06	3.16437e+06	763610	1.71619e+06	2.94315e+06	3.09213e+06	2.00767e+06	2.64017e+06
O00338	Sulfotransferase 1C2 OS=Homo sapiens OX=9606 GN=SULT1C2 PE=1 SV=1	9	2	2	2	4.24	0.844	-0.24	0.989041	21.15	763786	624324	181179	351656	336033	485399	452605	624324
H0Y742	SUN domain-containing protein 1 (Fragment) OS=Homo sapiens OX=9606 GN=SUN1 PE=1 SV=1	3	1	2	1	5.89	0.671	-0.58	0.899409	3.54	758967	509003	166660	349437	279668		322943
Q15527	Surfeit locus protein 2 OS=Homo sapiens OX=9606 GN=SURF2 PE=1 SV=3	4	1	2	1	5.06	0.996	-0.01	0.946809	23.84	278662	253190		111298	211087	277004	160639	228883
Q4LDE5	Sushi, von Willebrand factor type A, EGF and pentraxin domain-containing protein 1 OS=Homo sapiens OX=9606 GN=SVEP1 PE=1 SV=3	0	1	2	1	4.78	0.373	-1.42	0.388697	22.77	502732	187634		274151	278917	138230		207737
F8VRQ4	SWI/SNF-related matrix-associated actin-dependent regulator of chromatin subfamily D member 1 OS=Homo sapiens OX=9606 GN=SMARCD1 PE=1 SV=1	7	1	1	1	2.67	0.613	-0.71	0.837052	2.44	709950	435037		321540	474255		276014
O43426	Synaptojanin-1 OS=Homo sapiens OX=9606 GN=SYNJ1 PE=1 SV=2	4	4	4	4	8.83	0.674	-0.57	0.904899	61.36	739383	513789	243402	340420	314019		469447	356771
Q9BX26	Synaptonemal complex protein 2 OS=Homo sapiens OX=9606 GN=SYCP2 PE=2 SV=2	3	2	2	2	5.38	0.714	-0.49	0.933028	15.06	1.45808e+07	1.04822e+07	2.84107e+06	6.71319e+06	10628498	9417926	6650547	7126277
Q8IZU3	Synaptonemal complex protein 3 OS=Homo sapiens OX=9606 GN=SYCP3 PE=1 SV=1	15	2	2	2	4.74	0.849	-0.24	0.994367	24.95	471183	400006	118058	159385	309624	343472	250222	400006
Q9Y4G6	Talin-2 OS=Homo sapiens OX=9606 GN=TLN2 PE=1 SV=4	6	5	5	5	14.52	0.774	-0.37	0.958237	17.34	583105	451071	139683	268468	273010	400564	222128	451071
O60784	Target of Myb protein 1 OS=Homo sapiens OX=9606 GN=TOM1 PE=1 SV=2	10	2	2	2	4.79	0.686	-0.54	0.916526	18.59	600160	444778		241396	451434	362774	306755	350169
Q5TCY1	Tau-tubulin kinase 1 OS=Homo sapiens OX=9606 GN=TTBK1 PE=1 SV=2	3	2	3	2	6.88	0.593	-0.75	0.810846	39.73	715858	424739	144673		499196	458673		320800
Q4KMP7	TBC1 domain family member 10B OS=Homo sapiens OX=9606 GN=TBC1D10B PE=1 SV=3	5	3	3	3	6.96	0.01	-6.64	4.1949e-17		1.15509e+06			757651	532792
Q9NVG8	TBC1 domain family member 13 OS=Homo sapiens OX=9606 GN=TBC1D13 PE=1 SV=3	8	1	1	1	2.5	0.964	-0.05	0.958135	26.87	484121	466749	112600		293341	462813	243591
Q9P2M4	TBC1 domain family member 14 OS=Homo sapiens OX=9606 GN=TBC1D14 PE=1 SV=3	7	2	2	2	5.74	0.698	-0.52	0.922193	32.65	562545	392906	139657	259002	336693	320465	319674	192429
Q3MII6	TBC1 domain family member 25 OS=Homo sapiens OX=9606 GN=TBC1D25 PE=1 SV=2	8	2	3	2	8.12	0.721	-0.47	0.941069	73.19	838451	604264	389097	386033	278960		383382
O95935	T-box transcription factor TBX18 OS=Homo sapiens OX=9606 GN=TBX18 PE=1 SV=3	2	1	2	1	4.38	0.957	-0.06	0.958135	7.11	467293	447402	100365	214833			297828	426419
Q99973	Telomerase protein component 1 OS=Homo sapiens OX=9606 GN=TEP1 PE=1 SV=2	3	4	8	4	20.96	0.626	-0.67	0.856892	40.49	910914	2.78173e+06	39398.2	419396	3.06526e+06	2.62314e+06	1.26091e+06	2.78173e+06
Q8NDF8	Terminal nucleotidyltransferase 4B OS=Homo sapiens OX=9606 GN=TENT4B PE=1 SV=2	4	1	1	1	3.4	0.678	-0.56	0.910785	7.57	165483	112143			108743	86915.3		118016
A0A140T8X9	Testis-expressed basic protein 1 OS=Homo sapiens OX=9606 GN=TSBP1 PE=1 SV=1	8	3	6	3	13.69	0.745	-0.42	0.946809	9.4	493967	358175		200959	367350		266156	305815
I3L3F7	Testisin (Fragment) OS=Homo sapiens OX=9606 GN=PRSS21 PE=4 SV=1	35	1	4	1	10.67	0.01	-6.64	4.1949e-17		536692			247099
A8MTE9	Tetratricopeptide repeat protein 12 OS=Homo sapiens OX=9606 GN=TTC12 PE=1 SV=1	3	1	3	1	6.39	0.606	-0.72	0.827779	12.53	806847	489021	173042			366580		532083
Q96EK4	THAP domain-containing protein 11 OS=Homo sapiens OX=9606 GN=THAP11 PE=1 SV=2	3	1	1	1	2.02	0.89	-0.17	0.984661	18.96	850957	755907	201205	391790	486110	537191	551152	755907
Q86VQ3	Thioredoxin domain-containing protein 2 OS=Homo sapiens OX=9606 GN=TXNDC2 PE=1 SV=4	4	1	1	1	2.51	0.546	-0.87	0.742176	30.96	6.66162e+06	3.56727e+06	348140	3067087	5.1899e+06	3.51717e+06	2263300	3.40397e+06
E9PIN7	Thioredoxin-related transmembrane protein 4 (Fragment) OS=Homo sapiens OX=9606 GN=TMX4 PE=1 SV=1	10	1	2	1	4.64	0.341	-1.55	0.311343	66.41	604957	206492	121665		423926		207772	130204
B7ZB98	THO complex subunit 2 (Fragment) OS=Homo sapiens OX=9606 GN=THOC2 PE=1 SV=1	23	1	1	1	2.21	0.594	-0.75	0.810846	18.01	320600	190419	77613.8		186635			190419
A2RTX5	Threonine--tRNA ligase 2, cytoplasmic OS=Homo sapiens OX=9606 GN=TARS3 PE=1 SV=1	4	2	2	2	4.37	0.381	-1.39	0.404622	13.86	2.80041e+06	1.0669e+06	600596			955346		971798
P23919	Thymidylate kinase OS=Homo sapiens OX=9606 GN=DTYMK PE=1 SV=4	15	2	2	2	4.96	0.609	-0.71	0.834191	0	975178	594293		448983				594293
P10827	Thyroid hormone receptor alpha OS=Homo sapiens OX=9606 GN=THRA PE=1 SV=1	3	1	2	1	5.57	0.01	-6.64	4.1949e-17		431425		117428	156511
Q9Y2W1	Thyroid hormone receptor-associated protein 3 OS=Homo sapiens OX=9606 GN=THRAP3 PE=1 SV=2	1	1	1	1	1.84	0.711	-0.49	0.931198	6.17	411813	292888		189604		249256	185826	234688
G3V1L9	Tight junction protein ZO-1 OS=Homo sapiens OX=9606 GN=TJP1 PE=1 SV=2	3	2	3	2	8.6	0.343	-1.54	0.312898	79.34	353206	406135			232099		319053	328007
O95049	Tight junction protein ZO-3 OS=Homo sapiens OX=9606 GN=TJP3 PE=1 SV=3	1	1	1	1	2.21	0.01	-6.64	4.1949e-17		906560			417391
Q8WZ42	Titin OS=Homo sapiens OX=9606 GN=TTN PE=1 SV=4	1	23	24	23	55.16	0.754	-0.41	0.953569	76.35	1.65755e+06	1.89872e+06	61689.2	763154	1.22888e+06	1.41427e+06	1.31883e+06	1.89872e+06
Q96KP6	TNFAIP3-interacting protein 3 OS=Homo sapiens OX=9606 GN=TNIP3 PE=1 SV=2	4	1	1	1	2.69	0.745	-0.42	0.946809	63.23	1.90069e+06	1.41689e+06	407635	1.02932e+06	1.05715e+06	571579	1.56744e+06	1.41689e+06
Q9NYK1	Toll-like receptor 7 OS=Homo sapiens OX=9606 GN=TLR7 PE=1 SV=1	2	1	2	1	5.03	0.765	-0.39	0.958135	34.32	335093	275258	95006.6	154281	189937	276485	174641	197746
F5H3S6	TOM1-like protein 2 OS=Homo sapiens OX=9606 GN=TOM1L2 PE=1 SV=1	4	1	1	1	2.05	0.01	-6.64	4.1949e-17		663109		164416		376904
A6NNK5	TP53-binding protein 1 OS=Homo sapiens OX=9606 GN=TP53BP1 PE=1 SV=2	2	2	2	2	4.71	0.01	-6.64	4.1949e-17		712499		116332		615001
C9JC32	Trafficking kinesin-binding protein 1 OS=Homo sapiens OX=9606 GN=TRAK1 PE=1 SV=1	3	2	2	2	3.93	0.48	-1.06	0.64176	23.36	577931	277160		227437	444305	226060
B4DGI9	Transcription factor 12 (Fragment) OS=Homo sapiens OX=9606 GN=TCF12 PE=1 SV=1	5	2	2	2	4.26	0.342	-1.55	0.312077	12.01	403248	137763		201303	244391		87405.2
Q9UGU0	Transcription factor 20 OS=Homo sapiens OX=9606 GN=TCF20 PE=1 SV=3	3	4	4	4	9.33	0.601	-0.73	0.82143	27.19	888634	489812		349204	684160	345874	310767	687115
H3BT24	Transcription factor 4 (Fragment) OS=Homo sapiens OX=9606 GN=TCF4 PE=1 SV=2	14	1	1	1	0	0.93	-0.1	0.974997	15.68	389021	361830		179110		556820	207607	361830
A0AVK6	Transcription factor E2F8 OS=Homo sapiens OX=9606 GN=E2F8 PE=1 SV=1	6	2	2	2	5.14	0.759	-0.4	0.956596	24.34	62495.7	47442.9	13403.3			32862		55865.3
F5H0I3	Transcription factor SOX-5 OS=Homo sapiens OX=9606 GN=SOX5 PE=1 SV=1	5	3	5	3	10.95	0.919	-0.12	0.979208	45.18	547882	342639	78051.4		541999	640980	217392	326685
H0Y9L7	Transcription initiation factor TFIID subunit 1 (Fragment) OS=Homo sapiens OX=9606 GN=TAF1 PE=1 SV=1	13	2	3	2	7.12	0.347	-1.53	0.322191	26.96	829636	287690	177929			281174		240087
Q7Z7C8	Transcription initiation factor TFIID subunit 8 OS=Homo sapiens OX=9606 GN=TAF8 PE=1 SV=1	6	1	1	1	2.09	0.523	-0.94	0.723082	5.59	468396	244863	100456				149608	254272
C9IYH8	Transcription regulator protein BACH1 (Fragment) OS=Homo sapiens OX=9606 GN=BACH1 PE=1 SV=1	16	1	6	1	17.08	0.464	-1.11	0.604935	0	3.08769e+06	1.43332e+06			2.02898e+06			1.43332e+06
P46100	Transcriptional regulator ATRX OS=Homo sapiens OX=9606 GN=ATRX PE=1 SV=5	5	5	7	5	17.08	0.906	-0.14	0.979208	20.11	1.23959e+06	1.12316e+06		570721		1.04873e+06	622468
A0A087WYP7	Transducin beta-like protein 3 OS=Homo sapiens OX=9606 GN=TBL3 PE=1 SV=1	5	1	1	1	2.6	0.01	-6.64	4.1949e-17		992304		138438		1002396
A0A669KBK8	Transducin-like enhancer protein 1 (Fragment) OS=Homo sapiens OX=9606 GN=TLE1 PE=1 SV=1	27	3	4	3	9.32	0.884	-0.18	0.985899	9.92	536231	508242	187210	246887	351446	385796	322460	1.12979e+06
Q13595	Transformer-2 protein homolog alpha OS=Homo sapiens OX=9606 GN=TRA2A PE=1 SV=1	15	2	3	2	8.02	0.566	-0.82	0.779334	11.84	322482	182568	100510	148474	194981	148908
Q96QT4	Transient receptor potential cation channel subfamily M member 7 OS=Homo sapiens OX=9606 GN=TRPM7 PE=1 SV=1	1	1	1	1	2.59	0.01	-6.64	4.1949e-17		596810		167815	226386	392176
P49770	Translation initiation factor eIF-2B subunit beta OS=Homo sapiens OX=9606 GN=EIF2B2 PE=1 SV=3	12	1	1	1	3.05	0.01	-6.64	4.1949e-17		714287		153191
Q8TDI7	Transmembrane channel-like protein 2 OS=Homo sapiens OX=9606 GN=TMC2 PE=2 SV=3	1	1	1	1	1.67	0.538	-0.89	0.729738	10.94	102241	55025.6	21927.4	50545.4	47665.2		34911.6
C9JFU4	Transmembrane channel-like protein 4 (Fragment) OS=Homo sapiens OX=9606 GN=TMC4 PE=1 SV=8	5	1	1	1	1.5	0.347	-1.53	0.322191	5.09	212915	73821		98028.5		58179.3	48472
E9PIH8	Transmembrane protein 126A OS=Homo sapiens OX=9606 GN=TMEM126A PE=1 SV=1	23	1	1	1	1.96	0.01	-6.64	4.1949e-17		503622			262055	292825
Q9BTV4	Transmembrane protein 43 OS=Homo sapiens OX=9606 GN=TMEM43 PE=1 SV=1	3	1	1	1	2.05	0.01	-6.64	4.1949e-17		662013		165530	261434
J3KS76	Transmembrane protein 94 OS=Homo sapiens OX=9606 GN=TMEM94 PE=1 SV=1	9	1	2	1	4.45	0.869	-0.2	0.995247	4.16	1.13034e+06	982672		520423		668208	623468	1011036
A0A7P0T938	Transmembrane protein KIAA1109 OS=Homo sapiens OX=9606 GN=KIAA1109 PE=4 SV=1	1	3	3	3	6.41	0.834	-0.26	0.984772	41.09	383463	319833	65984.5	225807	251981	360894	136863	319833
H0Y720	Trinucleotide repeat-containing gene 6B protein (Fragment) OS=Homo sapiens OX=9606 GN=TNRC6B PE=1 SV=1	4	3	3	3	7.08	0.598	-0.74	0.819488	86.15	703841	2.26917e+06	150951	530249	446606		661299	4.94016e+06
Q3LXA3	Triokinase/FMN cyclase OS=Homo sapiens OX=9606 GN=TKFC PE=1 SV=2	6	2	2	2	4.07	0.558	-0.84	0.764375	45.21	726745	405173	203389	334602	316171		257067
F2Z2M2	Tripartite motif-containing protein 14 OS=Homo sapiens OX=9606 GN=TRIM14 PE=1 SV=1	21	1	1	1	2.59	0.547	-0.87	0.743583	5.19	148925	81434.2	30812.6		101440		52999	79387.4
O75962	Triple functional domain protein OS=Homo sapiens OX=9606 GN=TRIO PE=1 SV=2	2	3	3	3	7.33	0.969	-0.05	0.957396	28.79	1.44108e+06	188502		547055	1.14851e+06	1.20561e+06	96275.9	188502
J3KRC5	tRNA-splicing endonuclease subunit Sen54 OS=Homo sapiens OX=9606 GN=TSEN54 PE=1 SV=2	4	1	1	1	1.53	0.715	-0.48	0.933505	41.61	95969.2	68576.6	18651.5		69591.2	43144.4	43509.3	123353
B7Z596	Tropomyosin alpha-1 chain OS=Homo sapiens OX=9606 GN=TPM1 PE=1 SV=1	16	2	2	2	5.3	0.556	-0.85	0.761329	77.8	1.13743e+06	632474	188377	523687	821022	1.19234e+06	401280	403501
Q96NA8	t-SNARE domain-containing protein 1 OS=Homo sapiens OX=9606 GN=TSNARE1 PE=1 SV=2	3	1	1	1	2.18	0.668	-0.58	0.899409	59.81	468177	312849	49991.1	215554	431755	171427	207290	312849
C9J1F2	Tubulin epsilon and delta complex protein 1 (Fragment) OS=Homo sapiens OX=9606 GN=TEDC1 PE=1 SV=1	18	1	3	1	8.38	0.964	-0.05	0.958135	44.59	356530	343846	99458.6	164151	168537	165074	218158	571220
B7ZAG4	Tudor and KH domain-containing protein OS=Homo sapiens OX=9606 GN=TDRKH PE=1 SV=1	29	2	3	2	7.52	0.771	-0.38	0.958135	33.1	551971	425533		317735	290107		272327	421872
O60522	Tudor domain-containing protein 6 OS=Homo sapiens OX=9606 GN=TDRD6 PE=2 SV=2	1	1	1	1	2.27	0.494	-1.02	0.675096	15.7	596852	294563		305428	352870			294563
Q15628	Tumor necrosis factor receptor type 1-associated DEATH domain protein OS=Homo sapiens OX=9606 GN=TRADD PE=1 SV=2	7	1	1	1	2.11	0.499	-1	0.67697	20.71	673562	322930		354534	387158	247115	204887	372561
Q2TAM9	Tumor suppressor candidate gene 1 protein OS=Homo sapiens OX=9606 GN=TUSC1 PE=1 SV=3	17	2	2	2	4.26	0.639	-0.65	0.867986	29.2	1.38877e+06	863876	341290	639407	826315	836563	548096	685273
A0A1B0GTR9	Tyrosine-protein kinase (Fragment) OS=Homo sapiens OX=9606 GN=JAK2 PE=1 SV=1	2	1	1	1	2.08	0.593	-0.75	0.810846	27.96	565180	335277			371391	329859		277954
P00519	Tyrosine-protein kinase ABL1 OS=Homo sapiens OX=9606 GN=ABL1 PE=1 SV=4	2	1	2	1	5.51	0.409	-1.29	0.475583	2.54	175994	71945.3			115649	108390	44876.5	71945.3
P09769	Tyrosine-protein kinase Fgr OS=Homo sapiens OX=9606 GN=FGR PE=1 SV=2	5	1	1	1	2.85	0.607	-0.72	0.829812	91.11	81001.1	65000.9	87079.4	37293.8	52663.8	39687.5	41240.6	127592
Q08881	Tyrosine-protein kinase ITK/TSK OS=Homo sapiens OX=9606 GN=ITK PE=1 SV=1	3	1	6	1	16.91	0.939	-0.09	0.970962	40.13	2.14471e+06	1.72218e+06	306237	987449	1.83857e+06	2.25141e+06	1.09266e+06	1.34032e+06
P43403	Tyrosine-protein kinase ZAP-70 OS=Homo sapiens OX=9606 GN=ZAP70 PE=1 SV=1	2	1	1	1	1.54	0.424	-1.24	0.506237	17.53	50839.7	21575.9		23407.2		19801.6		19174.8
Q12923	Tyrosine-protein phosphatase non-receptor type 13 OS=Homo sapiens OX=9606 GN=PTPN13 PE=1 SV=2	1	1	1	1	2.87	0.763	-0.39	0.957396	25.99	664734	483367		366664	364601	383363	347261	483367
Q9H3S7	Tyrosine-protein phosphatase non-receptor type 23 OS=Homo sapiens OX=9606 GN=PTPN23 PE=1 SV=1	2	2	2	2	5.02	0.593	-0.75	0.810846	45.65	641198	446256	137516	349003	173987		283132
J3QT41	Tyrosine-protein phosphatase non-receptor type 4 (Fragment) OS=Homo sapiens OX=9606 GN=PTPN4 PE=1 SV=1	8	1	36	1	100.06	0.774	-0.37	0.958237	142.97	1.04275e+07	1.36808e+06	2.23635e+06	6.18262e+06	315104	8.47808e+06	867995	1.22804e+06
P11441	Ubiquitin-like protein 4A OS=Homo sapiens OX=9606 GN=UBL4A PE=1 SV=1	6	1	1	1	1.55	0.592	-0.76	0.810846	78.56	83856.4	49680.7		38608.5			52373.2	29900
A0A087WU80	Ubiquitinyl hydrolase 1 OS=Homo sapiens OX=9606 GN=TNFAIP3 PE=1 SV=1	1	1	1	1	1.78	0.616	-0.7	0.841237	24.92	254018	156380		104694	186466		82320.6	188479
E9PD17	UDP-glucuronosyltransferase OS=Homo sapiens OX=9606 GN=UGT3A1 PE=1 SV=1	3	1	1	1	2.18	0.01	-6.64	4.1949e-17		1.15695e+06			690564	586432
Q7Z695	Uncharacterized aarF domain-containing protein kinase 2 OS=Homo sapiens OX=9606 GN=ADCK2 PE=1 SV=1	5	2	2	2	4.34	0.142	-2.81	0.00536935	0	567348	80666.2	121677				51179.7
H3BMJ2	Uncharacterized protein C15orf39 (Fragment) OS=Homo sapiens OX=9606 GN=C15orf39 PE=1 SV=1	3	1	1	1	2.59	0.593	-0.75	0.810846	26.17	596963	390988	164807	228771	392277	318902	186818	429602
C9JG08	Uncharacterized protein C2orf16 OS=Homo sapiens OX=9606 GN=C2orf16 PE=1 SV=2	2	4	5	4	12.8	0.01	-6.64	4.1949e-17		179409			82602
C9IYC4	Uncharacterized protein C3orf18 OS=Homo sapiens OX=9606 GN=C3orf18 PE=1 SV=1	11	1	1	1	1.58	0.962	-0.06	0.958135	0	659084	633952		303450		517070
A0A0G2JLL6	Uncharacterized protein OS=Homo sapiens OX=9606 PE=3 SV=1	9	2	2	2	4.28	0.683	-0.55	0.914855	26.12	212406	145131	38230.2	116529			92080.1
A0A3B3ITT6	Uncharacterized protein OS=Homo sapiens OX=9606 PE=4 SV=1	34	1	1	1	2.53	0.367	-1.45	0.374362	23.98	1.01038e+06	370351	262887	383448		248556	285563
H3BRD5	Unconventional myosin-IXa OS=Homo sapiens OX=9606 GN=MYO9A PE=1 SV=1	2	3	3	3	7.46	0.54	-0.89	0.730078	37.96	685223	345953		276390	513964	282170	201174	377667
M0R0P8	Unconventional myosin-IXb OS=Homo sapiens OX=9606 GN=MYO9B PE=1 SV=1	2	3	3	3	7.1	0.01	-6.64	4.1949e-17		833218		221698	366939	547524
Q13402	Unconventional myosin-VIIa OS=Homo sapiens OX=9606 GN=MYO7A PE=1 SV=2	2	2	3	2	7.38	0.59	-0.76	0.810588	43.24	2.65104e+06	1.52986e+06	648064	1220568	1.25846e+06	2.05171e+06	970640	1.12924e+06
H3BSD9	Unconventional myosin-VIIb (Fragment) OS=Homo sapiens OX=9606 GN=MYO7B PE=1 SV=1	19	1	1	1	2.05	0.982	-0.03	0.953569	94.75	49226.7	42373.3	10557.5	16910.7	33318.3	17268		84808.1
Q6PIF6	Unconventional myosin-VIIb OS=Homo sapiens OX=9606 GN=MYO7B PE=1 SV=2	2	2	4	2	10.72	0.58	-0.79	0.795198	55.54	120881	70131.3			79433.5	39654.8		101163
A0A0J9YY01	Unconventional myosin-XVB OS=Homo sapiens OX=9606 GN=MYO15B PE=1 SV=1	3	5	5	5	11.22	0.523	-0.93	0.723082	63.08	57991.3	41253.2	27074.3	26699.9	33801.9	17359.1	26173.6	66042.6
Q9Y6X6	Unconventional myosin-XVI OS=Homo sapiens OX=9606 GN=MYO16 PE=1 SV=3	1	1	1	1	2.24	0.831	-0.27	0.984661	27.24	1.88816e+06	1.81766e+06	496082	869332	1.22244e+06	1.02744e+06	1153235	1.92117e+06
A0A1B0GWJ6	Unconventional myosin-XVIIIa (Fragment) OS=Homo sapiens OX=9606 GN=MYO18A PE=1 SV=1	5	1	1	1	2.23	0.692	-0.53	0.920673	24.18	683046	472559		314482		453386		401733
A0A3B3IRR6	UPF0488 protein C8orf33 OS=Homo sapiens OX=9606 GN=C8orf33 PE=1 SV=1	12	2	3	2	7.35	0.853	-0.23	0.995247	35.64	533224	1.73368e+06	317118	245502	307903	284912	1099956	2.8914e+06
A6NLC5	UPF0524 protein C3orf70 OS=Homo sapiens OX=9606 GN=C3orf70 PE=2 SV=1	4	1	1	1	2.01	0.01	-6.64	4.1949e-17		599066		169812	208682
Q5BKX5	UPF0692 protein C19orf54 OS=Homo sapiens OX=9606 GN=C19orf54 PE=1 SV=2	5	1	1	1	2.01	0.01	-6.64	4.1949e-17		282890		71461.5		157823
O00526	Uroplakin-2 OS=Homo sapiens OX=9606 GN=UPK2 PE=1 SV=2	5	1	1	1	1.67	0.934	-0.1	0.971877	34.63	120633	112716		70535.4	62419.2		73866.6	109126
P47901	Vasopressin V1b receptor OS=Homo sapiens OX=9606 GN=AVPR1B PE=1 SV=1	2	1	1	1	2.04	0.78	-0.36	0.962791	60.27	85026.3	66309.5	22944.5	39147.1	50007.1	32327.9	42070.8	111731
P23763	Vesicle-associated membrane protein 1 OS=Homo sapiens OX=9606 GN=VAMP1 PE=1 SV=1	28	1	1	1	3.28	0.762	-0.39	0.957396	36.61	172707	131627		101540	88873.6			131627
A0A6Q8PGU6	Vesicle-fusing ATPase OS=Homo sapiens OX=9606 GN=SPATA5 PE=1 SV=1	5	3	3	3	6.23	0.01	-6.64	4.1949e-17		482189		77502.6	296227
Q9NZR4	Visual system homeobox 1 OS=Homo sapiens OX=9606 GN=VSX1 PE=1 SV=2	5	1	3	1	4.14	0.478	-1.07	0.639526	88.53	856321	277698	79563.1	434764	562706	226499	112456	1.01557e+06
P45880	Voltage-dependent anion-selective channel protein 2 OS=Homo sapiens OX=9606 GN=VDAC2 PE=1 SV=2	3	1	1	1	1.51	0.499	-1	0.67697	41.37	475318	237149		218842		70530.4	150462	328920
A0A1W2PQ56	Voltage-dependent L-type calcium channel subunit alpha (Fragment) OS=Homo sapiens OX=9606 GN=CACNA1D PE=1 SV=1	4	3	3	3	7.25	0.149	-2.75	0.00692573	0	505283	75036		232638				75036
P54284	Voltage-dependent L-type calcium channel subunit beta-3 OS=Homo sapiens OX=9606 GN=CACNB3 PE=1 SV=1	5	1	1	1	2.67	0.879	-0.19	0.988424	65.75	1.11563e+06	980994	214178	573821		1.28933e+06	386248
P04275	von Willebrand factor OS=Homo sapiens OX=9606 GN=VWF PE=1 SV=4	0	1	1	1	2.49	0.986	-0.02	0.95198	15.41	236673	260343	57477.5	104673	155523	212344	167606	220796
P0DP72	V-set and immunoglobulin domain-containing protein 10-like 2 OS=Homo sapiens OX=9606 GN=VSIG10L2 PE=3 SV=1	5	1	1	1	3.01	0.01	-6.64	4.1949e-17		1.1177e+06		265792		662395
E7ESD2	WASH complex subunit 2A OS=Homo sapiens OX=9606 GN=WASHC2A PE=1 SV=2	3	3	3	3	5.22	0.651	-0.62	0.875485	40.23	514025	251603	75648.9		492234	187374	159633	613543
O75717	WD repeat and HMG-box DNA-binding protein 1 OS=Homo sapiens OX=9606 GN=WDHD1 PE=1 SV=1	2	1	1	1	2.9	0.826	-0.28	0.981966	0	860400	710725		396138			450928
Q9P2L0	WD repeat-containing protein 35 OS=Homo sapiens OX=9606 GN=WDR35 PE=1 SV=3	5	3	3	3	7.59	0.535	-0.9	0.729182	32.06	2.01146e+06	1.07638e+06	234366	926099	1.60761e+06	877931	807628	930893
Q9NW82	WD repeat-containing protein 70 OS=Homo sapiens OX=9606 GN=WDR70 PE=1 SV=1	8	2	2	2	4.97	0.341	-1.55	0.311343	31.54	1.0356e+06	353383	276804	382579			233929	338697
H0YKE0	WD repeat-containing protein 72 OS=Homo sapiens OX=9606 GN=WDR72 PE=1 SV=1	5	3	4	3	10	0.934	-0.1	0.971877	7.06	358734	333654	87429.6		207439	130698		694733
Q8IWA0	WD repeat-containing protein 75 OS=Homo sapiens OX=9606 GN=WDR75 PE=1 SV=1	4	1	1	1	2.78	0.534	-0.91	0.729182	78.22	584794	312229		311585	332063	453849		175198
C9JCF9	WD repeat-containing protein 81 (Fragment) OS=Homo sapiens OX=9606 GN=WDR81 PE=1 SV=1	17	1	3	1	8.16	0.429	-1.22	0.519327	36.44	2.83233e+06	1.21575e+06		1.30404e+06		795957	1.34054e+06	1.21575e+06
Q14191	Werner syndrome ATP-dependent helicase OS=Homo sapiens OX=9606 GN=WRN PE=1 SV=2	3	2	2	2	5.49	0.801	-0.32	0.979204	39.32	249165	199485	39266.7	114719	225097			199485
A6NJL1	Zinc finger and SCAN domain-containing protein 5B OS=Homo sapiens OX=9606 GN=ZSCAN5B PE=1 SV=1	6	2	2	2	3.54	0.01	-6.64	4.1949e-17		437020		124406		216354
O75132	Zinc finger BED domain-containing protein 4 OS=Homo sapiens OX=9606 GN=ZBED4 PE=1 SV=2	2	1	1	1	2.61	0.937	-0.09	0.971356	22.3	527291	494208	109169		358929	470757		423171
O60293	Zinc finger C3H1 domain-containing protein OS=Homo sapiens OX=9606 GN=ZFC3H1 PE=1 SV=3	3	3	3	3	6.39	0.385	-1.38	0.41252	0	719298	276794			472665	225761
M0QY97	Zinc finger CCCH domain-containing protein 4 (Fragment) OS=Homo sapiens OX=9606 GN=ZC3H4 PE=1 SV=1	4	2	2	2	4.12	0.97	-0.04	0.957396	40.49	1.56485e+06	1.51862e+06	256246		1.34677e+06		963508
A0A590UJW6	Zinc finger CCHC domain-containing protein 14 OS=Homo sapiens OX=9606 GN=ZCCHC14 PE=1 SV=1	10	3	4	3	12.64	0.429	-1.22	0.519327	36.44	2.83233e+06	1.21575e+06		1.30404e+06		795957	1.34054e+06	1.21575e+06
O95789	Zinc finger MYM-type protein 6 OS=Homo sapiens OX=9606 GN=ZMYM6 PE=1 SV=2	2	2	2	2	4.17	0.851	-0.23	0.995247	21.5	379504	322799			249380	229939	204804	460691
P51786	Zinc finger protein 157 OS=Homo sapiens OX=9606 GN=ZNF157 PE=2 SV=2	3	1	1	1	2.55	0.01	-6.64	4.1949e-17		90598.8		19568	41419.6
B4DI05	Zinc finger protein 263 OS=Homo sapiens OX=9606 GN=ZNF263 PE=1 SV=1	6	1	1	1	2.21	0.782	-0.35	0.96444	42.31	1.00881e+06	788773	290034	346481		670165	480420
J3KSJ1	Zinc finger protein 286A (Fragment) OS=Homo sapiens OX=9606 GN=ZNF286A PE=1 SV=1	9	1	1	1	2.65	0.8	-0.32	0.97815	34.99	458782	366844		163804	388757	325853		336848
Q96PQ6	Zinc finger protein 317 OS=Homo sapiens OX=9606 GN=ZNF317 PE=1 SV=2	5	1	1	1	3.04	0.01	-6.64	4.1949e-17		575695		183884	177971
Q5VUA4	Zinc finger protein 318 OS=Homo sapiens OX=9606 GN=ZNF318 PE=1 SV=2	1	2	2	2	3.34	0.3	-1.74	0.208886	107.46	1.09567e+06	329140			719984		409278	167938
A0A087WXF4	Zinc finger protein 33B (Fragment) OS=Homo sapiens OX=9606 GN=ZNF33B PE=4 SV=1	33	1	1	1	3.3	0.01	-6.64	4.1949e-17		897884			575839	423575
F8VWV6	Zinc finger protein 385A (Fragment) OS=Homo sapiens OX=9606 GN=ZNF385A PE=1 SV=1	6	1	1	1	1.72	0.01	-6.64	4.1949e-17		197748			112073	105563
Q9C0G0	Zinc finger protein 407 OS=Homo sapiens OX=9606 GN=ZNF407 PE=1 SV=2	2	2	2	2	5.53	0.894	-0.16	0.983175	56.68	90066.3	80526	18133		63046.5	44170.7		119738
Q96JM2	Zinc finger protein 462 OS=Homo sapiens OX=9606 GN=ZNF462 PE=1 SV=3	2	3	3	3	8.25	0.505	-0.98	0.68923	10.69	293302	148264	62903.6			112792	197537	148264
Q96KM6	Zinc finger protein 512B OS=Homo sapiens OX=9606 GN=ZNF512B PE=1 SV=1	1	1	1	1	2	0.385	-1.38	0.41252	36.41	1.04877e+06	403420		482866		209244	339287	403420
J3KSZ4	Zinc finger protein 521 (Fragment) OS=Homo sapiens OX=9606 GN=ZNF521 PE=1 SV=1	7	1	1	1	2.51	0.903	-0.15	0.979208	26.11	590358	505603	103683	329900	387936	359446	410432	505603
Q8N9K5	Zinc finger protein 565 OS=Homo sapiens OX=9606 GN=ZNF565 PE=2 SV=2	3	1	1	1	2.03	0.774	-0.37	0.958237	35.57	448198	346831			294520	499213	220051	279723
K7EKE0	Zinc finger protein 569 OS=Homo sapiens OX=9606 GN=ZNF569 PE=4 SV=1	76	1	1	1	2.41	0.597	-0.75	0.816298	20.89	509184	328191		215096	364678	267682	156341	334066
Q9H609	Zinc finger protein 576 OS=Homo sapiens OX=9606 GN=ZNF576 PE=1 SV=1	6	1	1	1	2.27	0.01	-6.64	4.1949e-17		393879				258826
Q92610	Zinc finger protein 592 OS=Homo sapiens OX=9606 GN=ZNF592 PE=1 SV=2	3	1	1	1	2.92	0.474	-1.08	0.630245	6.69	4.58349e+06	2.17296e+06	983006				1.31786e+06	2.2732e+06
Q6PF04	Zinc finger protein 613 OS=Homo sapiens OX=9606 GN=ZNF613 PE=1 SV=2	3	1	1	1	2.27	0.536	-0.9	0.729182	26.65	971211	520499	208293	527545	287504		330237
Q49AA0	Zinc finger protein 69 homolog OS=Homo sapiens OX=9606 GN=ZFP69 PE=2 SV=2	6	2	3	2	6.89	0.865	-0.21	0.995247	0	892524	771747			586496	629460
H0YLZ7	Zinc finger protein 710 (Fragment) OS=Homo sapiens OX=9606 GN=ZNF710 PE=1 SV=1	9	2	2	2	4.04	0.254	-1.98	0.108367	0	1.37309e+06	348373	294483			284143
C9JVX0	Zinc finger protein 808 (Fragment) OS=Homo sapiens OX=9606 GN=ZNF808 PE=1 SV=1	12	1	1	1	3.12	0.969	-0.05	0.957396	24.56	946131	908235	133439	440408	621722	641414	576241	926798
A0A0C4DH12	Zinc finger protein 821 OS=Homo sapiens OX=9606 GN=ZNF821 PE=1 SV=1	12	1	1	1	4.21	0.01	-6.64	4.1949e-17		652669		139976	226826	1289662
Q9BZE0	Zinc finger protein GLIS2 OS=Homo sapiens OX=9606 GN=GLIS2 PE=1 SV=2	7	1	1	1	3.58	0.372	-1.42	0.388137	23.32	420496	156611	75996.3	839380	276316		99363.6
H0YLR4	Zinc fingers and homeoboxes protein 3 (Fragment) OS=Homo sapiens OX=9606 GN=ZHX3 PE=1 SV=1	24	1	1	1	3.32	0.132	-2.93	0.00331438	0	1.78507e+06	234789		821866		191501
Q96I98	ZNF324 protein OS=Homo sapiens OX=9606 GN=ZNF324 PE=1 SV=1	11	1	2	1	5.14	0.057	-4.12	5.92822e-06	32.47	2.67345e+06	153625			1.75678e+06	125301	720472	126023
Protein <1.5 fold abundant in CRT treated NHS
Accession	Description	Coverage [%]	# Peptides	# PSMs	# Unique Peptides	Score Sequest HT: Sequest HT	Abundance Ratio: (NC) / (N)	Abundance Ratio (log2): (NC) / (N)	Abundance Ratio Adj. P-Value: (NC) / (N)	Abundance Ratio Variability [%]: (NC) / (N)	Abundances (Grouped): N	Abundances (Grouped): NC	Abundance: F10: Control, N	Abundance: F11: Control, N	Abundance: F12: Control, N	Abundance: F1: Sample, NC	Abundance: F2: Sample, NC	Abundance: F3: Sample, NC
Q15029	116 kDa U5 small nuclear ribonucleoprotein component OS=Homo sapiens OX=9606 GN=EFTUD2 PE=1 SV=1	3	2	2	2	4.62	1.452	0.54	0.6983	0	293999	426897		135361				426897
H0YA31	4'-phosphopantetheine phosphatase (Fragment) OS=Homo sapiens OX=9606 GN=PANK4 PE=1 SV=1	9	1	1	1	2.87	1.063	0.09	0.922193	45.38	1.8672e+06	1.98482e+06	834405	859679	939442	2.09147e+06	1.25929e+06	1.70341e+06
A0A0C4DGA7	Actin-binding LIM protein 3 OS=Homo sapiens OX=9606 GN=ABLIM3 PE=1 SV=1	10	4	4	4	9.79	1.456	0.54	0.694715	0	359077	522853			235957	426455
A0A0A0MT01	Actin-depolymerizing factor OS=Homo sapiens OX=9606 GN=GSN PE=1 SV=1	31	11	33	11	145.39	1.378	0.46	0.729182	51.96	5.40528e+06	9.0827e+06	689148	3.10446e+06	3.55192e+06	5.40864e+06	6.09408e+06	9.0827e+06
O14514	Adhesion G protein-coupled receptor B1 OS=Homo sapiens OX=9606 GN=ADGRB1 PE=1 SV=2	4	4	7	4	13.94	1.136	0.18	0.875485	23.29	2.63889e+06	2.60872e+06	566607	1.21498e+06	1.0395e+06	1.6953e+06	1.90345e+06	2.60872e+06
Q86V24	Adiponectin receptor protein 2 OS=Homo sapiens OX=9606 GN=ADIPOR2 PE=1 SV=1	3	1	1	1	1.78	1.394	0.48	0.72794	27.79	35937.8	53107.3		14757.7	26477.5	29656.6	37671	53107.3
P19652	Alpha-1-acid glycoprotein 2 OS=Homo sapiens OX=9606 GN=ORM2 PE=1 SV=2	14	3	12	2	34.77	1.182	0.24	0.855896	61.67	1.06476e+06	2.36454e+06	171807	490229	1.19629e+06	2.07989e+06	1.04247e+06	2.36454e+06
A0A024R6I7	Alpha-1-antitrypsin OS=Homo sapiens OX=9606 GN=SERPINA1 PE=1 SV=1	64	28	668	2	2423.32	1.367	0.45	0.731656	62.55	3.31998e+08	4.88729e+08	3.45423e+07	1.52856e+08	2.93212e+08	3.98622e+08	2.50359e+08	5.74474e+08
P04217	Alpha-1B-glycoprotein OS=Homo sapiens OX=9606 GN=A1BG PE=1 SV=4	37	10	43	10	160.41	1.151	0.2	0.8714	36.05	1.353e+07	1.59083e+07	2.90173e+06	6.10343e+06	9.97294e+06	1.29753e+07	9.17592e+06	1.80315e+07
P01023	Alpha-2-macroglobulin OS=Homo sapiens OX=9606 GN=A2M PE=1 SV=3	53	55	402	55	1465.97	1.248	0.32	0.810846	50.6	1.58594e+08	1.93819e+08	2.62901e+07	7.30184e+07	1.07065e+08	1.4867e+08	1.22971e+08	2.05848e+08
P04920	Anion exchange protein 2 OS=Homo sapiens OX=9606 GN=SLC4A2 PE=1 SV=4	2	4	9	4	15.99	1.025	0.04	0.941069	26.92	2.06927e+06	2.8143e+06	731335	952714	1.15081e+06	2.29543e+06	1.54734e+06	3.28989e+06
P0C6C1	Ankyrin repeat domain-containing protein 34C OS=Homo sapiens OX=9606 GN=ANKRD34C PE=3 SV=2	6	2	2	2	3.92	1.436	0.52	0.707503	26.12	544570	893993	116792	335651	294811	525615	567204	955752
Q6IWH7	Anoctamin-7 OS=Homo sapiens OX=9606 GN=ANO7 PE=1 SV=2	3	2	2	2	4.27	1.038	0.05	0.932489	16.71	668418	691073	149497	225303	439231	501928	438459	723259
P01008	Antithrombin-III OS=Homo sapiens OX=9606 GN=SERPINC1 PE=1 SV=1	57	18	74	18	286.4	1.348	0.43	0.746002	44.08	1.51204e+07	2.26935e+07	2.68895e+06	6.96162e+06	1.20032e+07	1.78701e+07	1.43982e+07	2.40335e+07
F5GYB0	AP-3 complex subunit beta-2 OS=Homo sapiens OX=9606 GN=AP3B2 PE=1 SV=1	12	1	1	1	2.54	1.061	0.09	0.922193	25.23	476116	429151	102111	268799	253760	505301	272280	419238
P02647	Apolipoprotein A-I OS=Homo sapiens OX=9606 GN=APOA1 PE=1 SV=1	55	21	197	21	650	1.091	0.13	0.910785	41.74	1.74897e+08	1.74592e+08	3.90852e+07	6.91068e+07	1.14928e+08	1.50414e+08	1.04318e+08	1.74592e+08
P06727	Apolipoprotein A-IV OS=Homo sapiens OX=9606 GN=APOA4 PE=1 SV=4	24	10	27	10	101.19	1.28	0.36	0.793467	41.17	5.89754e+06	6.74128e+06	1.26483e+06	2.87949e+06	2.86214e+06	4.02423e+06	4.73811e+06	6.74128e+06
P02649	Apolipoprotein E OS=Homo sapiens OX=9606 GN=APOE PE=1 SV=1	34	8	29	8	113.73	1.118	0.16	0.885651	28.77	2.60694e+06	3.52848e+06	346358	1.20027e+06	2.14282e+06	2.87793e+06	2.21869e+06	4.38715e+06
J3KPH2	Arachidonate lipoxygenase 3, isoform CRA_a OS=Homo sapiens OX=9606 GN=ALOXE3 PE=1 SV=1	1	1	2	1	4.06	1.084	0.12	0.914855	3.07	5.47567e+06	5.9332e+06	1.23183e+06	2.52106e+06	3.52526e+06	5.01728e+06	3.76439e+06	5843974
Q9ULH1	Arf-GAP with SH3 domain, ANK repeat and PH domain-containing protein 1 OS=Homo sapiens OX=9606 GN=ASAP1 PE=1 SV=4	5	3	3	2	7.02	1.025	0.04	0.941069	16.36	3.77342e+06	3.5693e+06	592463	1.80195e+06	2479588	2.52472e+06	2.54543e+06	3.5693e+06
F8VQP2	Ataxin-2 OS=Homo sapiens OX=9606 GN=ATXN2 PE=1 SV=1	1	1	1	1	2.04	1.092	0.13	0.909679	18.79	28635.8	31282.9		13184.2			22522.7	27567.7
Q9ULI0	ATPase family AAA domain-containing protein 2B OS=Homo sapiens OX=9606 GN=ATAD2B PE=1 SV=3	2	2	5	2	13.14	1.072	0.1	0.920673	45.53	2.62066e+06	2.91043e+06	584312		1.65647e+06	2.37383e+06	1.58336e+06	3.27078e+06
A0A669KBH0	AT-rich interactive domain-containing protein 5A OS=Homo sapiens OX=9606 GN=ARID5A PE=1 SV=1	8	1	1	1	2.58	1.315	0.39	0.774097	20.02	3.4875e+06	4.87346e+06	796864	1507132		3.97494e+06	2.32185e+06	4895876
Q9HCM4	Band 4.1-like protein 5 OS=Homo sapiens OX=9606 GN=EPB41L5 PE=1 SV=3	6	2	2	2	4.63	1.412	0.5	0.723493	11.39	29479.2	41624	6826.58		17940.5			41624
O95999	B-cell lymphoma/leukemia 10 OS=Homo sapiens OX=9606 GN=BCL10 PE=1 SV=1	9	1	1	1	2.53	1.168	0.22	0.861849	41.84	905607	1.05812e+06	93842.3	416952	807501	1.10659e+06	546404	1.05812e+06
C9JMD7	B-cell receptor-associated protein (Fragment) OS=Homo sapiens OX=9606 GN=BCAP31 PE=1 SV=1	11	1	2	1	5.1	1.482	0.57	0.67697	58.07	1.10477e+06	1.59768e+06		343913	1.0737e+06	1.30311e+06	788827	2.15666e+06
Q5H9F3	BCL-6 corepressor-like protein 1 OS=Homo sapiens OX=9606 GN=BCORL1 PE=1 SV=1	4	4	5	4	11.44	1.068	0.09	0.920673	24.25	340316	455411		129964	269609	371447	200491	978476
P25098	Beta-adrenergic receptor kinase 1 OS=Homo sapiens OX=9606 GN=GRK2 PE=1 SV=2	2	1	1	1	2.56	1.369	0.45	0.730078	27.22	119078	163064	25538.2				86192.5	195727
J3KSD8	Bleomycin hydrolase (Fragment) OS=Homo sapiens OX=9606 GN=BLMH PE=1 SV=8	4	1	1	1	2.66	1.32	0.4	0.770635	44.37	1.34078e+06	1.76956e+06	221321	617310	1.46616e+06	1.44331e+06	948941	2.3987e+06
P80723	Brain acid soluble protein 1 OS=Homo sapiens OX=9606 GN=BASP1 PE=1 SV=2	4	1	1	1	1.73	1.346	0.43	0.746462	0	397556	535082			261242			535082
B4E1Z4	C3/C5 convertase OS=Homo sapiens OX=9606 PE=1 SV=1	32	32	154	30	553.7	1.414	0.5	0.723082	43.35	5.7604e+07	8.0844e+07	9.18597e+06	2.65216e+07	4.63436e+07	5.46479e+07	5.12924e+07	8.71092e+07
A0A0G2JPR0	C4a anaphylatoxin OS=Homo sapiens OX=9606 GN=C4A PE=1 SV=1	62	84	967	0	3805.24	1.463	0.55	0.68923	50.38	4.65557e+08	6.28295e+08	5.3239e+07	2.14348e+08	3.68675e+08	5.66531e+08	3.75503e+08	6.28295e+08
A0A0G2JL54	C4a anaphylatoxin OS=Homo sapiens OX=9606 GN=C4B_2 PE=1 SV=1	64	83	933	4	3670.31	1.331	0.41	0.761329	43.62	1.26246e+07	2.17169e+07	614226	5.81253e+06	1.23488e+07	1.82146e+07	1.16837e+07	2.17169e+07
P04003	C4b-binding protein alpha chain OS=Homo sapiens OX=9606 GN=C4BPA PE=1 SV=2	71	38	663	38	2440.15	1.434	0.52	0.707503	51.98	5.73988e+08	6.93055e+08	6.44953e+07	3.34993e+08	3.77179e+08	5.65276e+08	4.96462e+08	6.73351e+08
A0A6I8PRU0	Cadherin EGF LAG seven-pass G-type receptor 1 OS=Homo sapiens OX=9606 GN=CELSR1 PE=1 SV=2	2	4	6	3	13.47	1.06	0.08	0.922193	21.25	1.30438e+07	1.39544e+07	2.79747e+06	6.2099e+06	8.31797e+06	9.38471e+06	9.38798e+06	1.39544e+07
D6RJG0	Cadherin-10 OS=Homo sapiens OX=9606 GN=CDH10 PE=1 SV=1	5	1	1	1	2.74	1.095	0.13	0.907512	58.46	53365.1	58426.6		27596.6	31221.2	28669.6	63465.6	58426.6
A0A0A0MRH3	Calsenilin OS=Homo sapiens OX=9606 GN=KCNIP3 PE=1 SV=1	9	1	2	1	5.62	1.12	0.16	0.883766	41.75	1.11942e+06	1.25376e+06	87554.7	640834	735596	734622	921555	1.25376e+06
P50416	Carnitine O-palmitoyltransferase 1, liver isoform OS=Homo sapiens OX=9606 GN=CPT1A PE=1 SV=2	2	1	4	1	10.1	1.061	0.09	0.922193	7.09	2.00285e+06	2.02294e+06	400322	922137	1.32217e+06	1.74081e+06	1.28348e+06	2.01575e+06
O75339	Cartilage intermediate layer protein 1 OS=Homo sapiens OX=9606 GN=CILP PE=1 SV=4	4	4	4	4	7.64	1.025	0.04	0.941069	26.92	2.06927e+06	2.12066e+06	731335	952714	1.15081e+06	1726001	1.54734e+06	2.12066e+06
Q6YHK3	CD109 antigen OS=Homo sapiens OX=9606 GN=CD109 PE=1 SV=2	2	1	2	1	5.28	1.318	0.4	0.771144	54.78	111838	147441	16127.1	76582.5			84835.2	162580
Q9NXG0	Centlein OS=Homo sapiens OX=9606 GN=CNTLN PE=1 SV=6	2	2	4	2	8.65	1.025	0.04	0.941069	16.36	3.77342e+06	3.5693e+06	592463	1.80195e+06	2479588	2.52472e+06	2.54543e+06	3.5693e+06
P00450	Ceruloplasmin OS=Homo sapiens OX=9606 GN=CP PE=1 SV=1	48	32	129	2	485.55	1.158	0.21	0.867986	44.25	5.42831e+07	5.67703e+07	1.61031e+07	2.15208e+07	3.56706e+07	4.13831e+07	3.68122e+07	5.67703e+07
H7C3D9	Cilia- and flagella-associated protein 298 (Fragment) OS=Homo sapiens OX=9606 GN=CFAP298 PE=3 SV=1	28	1	1	1	2.2	1.046	0.07	0.929339	48.09	171623	179581		84391.8	105594		160046	127844
P10909	Clusterin OS=Homo sapiens OX=9606 GN=CLU PE=1 SV=1	25	12	78	6	274.61	1.461	0.55	0.690684	30.18	2.70825e+07	4.21199e+07	3.20564e+06	1.24691e+07	2.11359e+07	3.66089e+07	2.67235e+07	4.11813e+07
P00740	Coagulation factor IX OS=Homo sapiens OX=9606 GN=F9 PE=1 SV=2	7	2	4	2	13.91	1.291	0.37	0.78275	37.23	250227	442516		85964.3	220364	393663	192176	442516
P00748	Coagulation factor XII OS=Homo sapiens OX=9606 GN=F12 PE=1 SV=3	6	2	7	2	29.74	1.32	0.4	0.770635	25.52	1.75572e+06	2.09768e+06		795155	1.17287e+06	1.55593e+06	1.3309e+06	2827151
P05160	Coagulation factor XIII B chain OS=Homo sapiens OX=9606 GN=F13B PE=1 SV=3	31	15	42	15	151.13	1.346	0.43	0.746462	29	5.96927e+06	8.06592e+06	897866	2.74832e+06	4.12112e+06	6.63206e+06	5.07103e+06	8.06592e+06
Q9H3L0	Cobalamin trafficking protein CblD OS=Homo sapiens OX=9606 GN=MMADHC PE=1 SV=2	10	1	3	1	7.94	1.196	0.26	0.844433	16.81	1.26123e+06	1.5088e+06			828778	1.23062e+06	1.06579e+06	989795
Q6ZUS5	Coiled-coil domain-containing protein 121 OS=Homo sapiens OX=9606 GN=CCDC121 PE=1 SV=1	4	1	1	1	2	1.389	0.47	0.729182	30.24	486140	675338	133343	178928	319453	530139	428476	717134
Q6ZRK6	Coiled-coil domain-containing protein 73 OS=Homo sapiens OX=9606 GN=CCDC73 PE=2 SV=2	3	3	3	3	6.49	1.009	0.01	0.946809	30.91	1.22913e+06	1.24023e+06		601496	759902	1.22018e+06	786879	681793
A6NKD9	Coiled-coil domain-containing protein 85C OS=Homo sapiens OX=9606 GN=CCDC85C PE=1 SV=1	5	1	4	1	11.43	1.084	0.12	0.914855	17.67	1.83123e+06	1.98558e+06	226926	843122	1.36617e+06	1.60504e+06		2.00347e+06
F5GZK2	Collagen alpha-1(XXI) chain OS=Homo sapiens OX=9606 GN=COL21A1 PE=1 SV=2	6	2	2	2	5.33	1.258	0.33	0.808245	95.12	1.14826e+06	1.10501e+06	114860		1617765	2.61655e+06	701089	650672
Q86Y22	Collagen alpha-1(XXIII) chain OS=Homo sapiens OX=9606 GN=COL23A1 PE=1 SV=1	7	3	3	3	6.28	1.265	0.34	0.802824	2.33	318636	402927			209383	323474	255642	431782
P02745	Complement C1q subcomponent subunit A OS=Homo sapiens OX=9606 GN=C1QA PE=1 SV=2	24	5	33	5	126.61	1.304	0.38	0.779334	43.85	1.32138e+07	1.50234e+07	933625	6.0838e+06	1.12606e+07	1.66296e+07	9.53178e+06	1.36058e+07
P02747	Complement C1q subcomponent subunit C OS=Homo sapiens OX=9606 GN=C1QC PE=1 SV=3	50	7	38	7	121.37	1.441	0.53	0.706534	50.36	1.08805e+07	2.02883e+07	1.17049e+06	5.00951e+06	1.03333e+07	1.65478e+07	9.82728e+06	2.22101e+07
P01024	Complement C3 OS=Homo sapiens OX=9606 GN=C3 PE=1 SV=2	86	174	4311	168	16743.1	1.475	0.56	0.68252	70.32	2.44912e+09	3.54899e+09	2.54951e+08	1.12761e+09	2.08719e+09	3.02552e+09	2.00674e+09	3.54899e+09
P0C0L4	Complement C4-A OS=Homo sapiens OX=9606 GN=C4A PE=1 SV=2	63	83	964	1	3787.29	1.244	0.31	0.811735	34.73	3.43443e+06	4.19421e+06	276856	1.58125e+06	2.62892e+06	3.26807e+06	2.66107e+06	4298381
P01031	Complement C5 OS=Homo sapiens OX=9606 GN=C5 PE=1 SV=4	55	53	160	53	580.59	1.454	0.54	0.697192	52.73	2.29393e+07	46469436	1.49138e+06	1.05615e+07	2.26406e+07	5.08504e+07	2.38803e+07	46469436
P07357	Complement component C8 alpha chain OS=Homo sapiens OX=9606 GN=C8A PE=1 SV=2	15	5	14	5	49.85	1.144	0.19	0.8714	22.17	420644	381571	103895	193669	172953	242958	311372	381571
P08603	Complement factor H OS=Homo sapiens OX=9606 GN=CFH PE=1 SV=4	64	65	760	62	2813.05	1.301	0.38	0.779823	35.69	4.80586e+08	5.88266e+08	7.56696e+07	2.21267e+08	3.21633e+08	5.19596e+08	3.73233e+08	5.71271e+08
B1AKG0	Complement factor H-related protein 1 OS=Homo sapiens OX=9606 GN=CFHR1 PE=1 SV=1	45	6	33	2	106.44	1.229	0.3	0.821811	26.75	559048	687300	119897	344812	311204	488947	436065	717654
B4DPQ0	Complement subcomponent C1r OS=Homo sapiens OX=9606 GN=C1R PE=1 SV=1	41	18	58	18	231.82	1.397	0.48	0.727206	42.02	9.46314e+06	1.47437e+07	532487	4.35694e+06	8.45841e+06	1.20254e+07	8.05995e+06	1.77942e+07
A0A5F9ZHA4	cTAGE family member 4 OS=Homo sapiens OX=9606 GN=CTAGE4 PE=4 SV=1	6	2	2	2	5.23	1.473	0.56	0.68252	13.88	993150	1.4629e+06	212998			1.19318e+06	531596	1.59986e+06
A0A7P0Z4J5	Cyclic AMP-dependent transcription factor ATF-4 OS=Homo sapiens OX=9606 GN=ATF4 PE=4 SV=1	43	1	1	1	3.23	1.155	0.21	0.867986	19.15	684297	790594		274271	516536	598700		851511
P35663	Cylicin-1 OS=Homo sapiens OX=9606 GN=CYLC1 PE=2 SV=2	3	1	2	1	5.1	1.032	0.04	0.935721	14.11	552675	570162	118531			465042	396179	498123
Q17RY0	Cytoplasmic polyadenylation element-binding protein 4 OS=Homo sapiens OX=9606 GN=CPEB4 PE=1 SV=1	5	1	1	1	3.32	1.134	0.18	0.875485	30.93	26641.9	36514.7	8385.77	12054	17506.9	29782.4	28132	26244
P53384	Cytosolic Fe-S cluster assembly factor NUBP1 OS=Homo sapiens OX=9606 GN=NUBP1 PE=1 SV=2	15	2	2	2	6.39	1.042	0.06	0.930603	5.42	668476	696251		307774		547491	458198
H3BMW1	Cytosolic Fe-S cluster assembly factor NUBP2 (Fragment) OS=Homo sapiens OX=9606 GN=NUBP2 PE=1 SV=1	16	1	1	1	2.06	1.046	0.07	0.929339	48.09	171623	179581		84391.8	105594		160046	127844
O00548	Delta-like protein 1 OS=Homo sapiens OX=9606 GN=DLL1 PE=1 SV=2	3	2	2	2	4.2	1.053	0.07	0.924144	0	25419.5	26759.6			16703.7			26759.6
Q8N8Z6	Discoidin, CUB and LCCL domain-containing protein 1 OS=Homo sapiens OX=9606 GN=DCBLD1 PE=1 SV=2	7	1	1	1	3.22	1.448	0.53	0.702583	37.83	5.85684e+06	7.91411e+06	585081	2.69656e+06	4822567	8665940	4961906	7.91411e+06
Q8NDZ4	Divergent protein kinase domain 2A OS=Homo sapiens OX=9606 GN=DIPK2A PE=1 SV=1	16	3	3	3	7.75	1.008	0.01	0.946809	15.72	1.96354e+06	1.9796e+06	389675	904034	1.76076e+06	1.96967e+06	1.25598e+06	1.90891e+06
P04053	DNA nucleotidylexotransferase OS=Homo sapiens OX=9606 GN=DNTT PE=1 SV=3	6	2	3	2	6.58	1.434	0.52	0.707503	27.04	1.62755e+06	2700998	170297	749344	1375145	928676	1.75078e+06	2700998
Q9UBZ9	DNA repair protein REV1 OS=Homo sapiens OX=9606 GN=REV1 PE=1 SV=1	5	2	2	2	6.43	1.255	0.33	0.810588	58.1	392686	492839	85040.7	162524	258042	244443	312688	742814
Q9NZQ0	DnaJ homolog subfamily C member 27 OS=Homo sapiens OX=9606 GN=DNAJC27 PE=1 SV=1	3	1	1	1	1.69	1.042	0.06	0.930603	19.66	5231.91	5453.24		2110.56	3923.86			5453.24
C9JY58	Dynamin-like 120 kDa protein, mitochondrial (Fragment) OS=Homo sapiens OX=9606 GN=OPA1 PE=1 SV=1	27	1	1	1	2.6	1.264	0.34	0.802824	20.19	2.36944e+06	2.99427e+06	447258	1.37419e+06	1.55701e+06	2.85286e+06	1.89975e+06	2.87859e+06
Q9NYC9	Dynein axonemal heavy chain 9 OS=Homo sapiens OX=9606 GN=DNAH9 PE=1 SV=3	1	4	5	4	11.08	1.165	0.22	0.862765	37.55	330385	384976		152113		403447	190099
Q96EP1	E3 ubiquitin-protein ligase CHFR OS=Homo sapiens OX=9606 GN=CHFR PE=1 SV=2	7	2	4	1	9.01	1.435	0.52	0.707503	34.08	95231.5	136664		33170.5	82718		70517.5	168041
Q8TDB6	E3 ubiquitin-protein ligase DTX3L OS=Homo sapiens OX=9606 GN=DTX3L PE=1 SV=1	4	1	1	1	2.55	1.098	0.14	0.90457	47.6	1.78684e+06	1962238	279447		1.61019e+06			1962238
A0A6Q8PGB2	E3 ubiquitin-protein ligase LRSAM1 OS=Homo sapiens OX=9606 GN=LRSAM1 PE=1 SV=1	15	4	4	1	10.59	1.082	0.11	0.914855	25.14	1.19563e+06	844411	256423	2.80654e+06	478263	525404	3.78823e+06	844411
Q9BSW2	EF-hand calcium-binding domain-containing protein 4B OS=Homo sapiens OX=9606 GN=CRACR2A PE=1 SV=2	2	1	1	1	2.21	1.434	0.52	0.707503	27.04	1.62755e+06	2700998	170297	749344	1375145	928676	1.75078e+06	2700998
Q8NDI1	EH domain-binding protein 1 OS=Homo sapiens OX=9606 GN=EHBP1 PE=1 SV=3	3	2	2	2	5.08	1.13	0.18	0.875531	0	1.34853e+06	1.52434e+06	289215				967136
H0Y6W4	EMI domain-containing protein 1 (Fragment) OS=Homo sapiens OX=9606 GN=EMID1 PE=4 SV=1	7	1	1	1	2.46	1.22	0.29	0.827779	25.63	732481	893785	247890	287534	481328	679724	656005	893785
Q7Z2K6	Endoplasmic reticulum metallopeptidase 1 OS=Homo sapiens OX=9606 GN=ERMP1 PE=1 SV=2	3	3	9	3	16.49	1.099	0.14	0.903937	25.78	1.33911e+07	1.47337e+07	2.86878e+06	6165416	9.74263e+06	1.01789e+07	9347988	1.72153e+07
Q5W0J8	Enoyl-CoA hydratase domain-containing protein 3, mitochondrial (Fragment) OS=Homo sapiens OX=9606 GN=ECHDC3 PE=1 SV=1	15	2	2	2	4.45	1.207	0.27	0.83676	0	806260	100504			529810			100504
A0A3B3ISV9	ERI1 exoribonuclease 3 OS=Homo sapiens OX=9606 GN=ERI3 PE=1 SV=1	10	2	2	2	4.4	1.079	0.11	0.916526	30.08	2.06707e+06	2.33278e+06	364674	951703	1.80029e+06	1.92242e+06	1.16433e+06	2.33278e+06
P02751	Fibronectin OS=Homo sapiens OX=9606 GN=FN1 PE=1 SV=5	30	38	143	38	525.54	1.281	0.36	0.793467	37.84	2.76952e+07	3.78509e+07	2.95527e+06	1.44876e+07	1.81991e+07	3.08994e+07	2.4015e+07	3.18936e+07
O75636	Ficolin-3 OS=Homo sapiens OX=9606 GN=FCN3 PE=1 SV=2	20	4	5	4	15.63	1.302	0.38	0.779823	43.99	1.14203e+06	1.91051e+06	118554	525803	1.27075e+06	1.50368e+06	1.21215e+06	2.45874e+06
A0A0C4DFW6	Forkhead box P3, isoform CRA_b OS=Homo sapiens OX=9606 GN=FOXP3 PE=1 SV=1	6	2	2	2	3.67	1.171	0.23	0.860071	78.09	1.63753e+06	1.39915e+06	102236	753936	1.1065e+06	740396	1.25135e+06	1.39915e+06
I3L3Y9	G protein pathway suppressor 2 (Fragment) OS=Homo sapiens OX=9606 GN=GPS2 PE=1 SV=1	14	1	1	1	3.53	1.246	0.32	0.810846	59.28	43142.2	53750.1	9252.57			29685.5	50363.1
Q08380	Galectin-3-binding protein OS=Homo sapiens OX=9606 GN=LGALS3BP PE=1 SV=1	22	7	34	7	132.82	1.337	0.42	0.756315	31.41	4.15792e+06	5.90065e+06	249654	1.91435e+06	3.00863e+06	5.57265e+06	3.46725e+06	5.90065e+06
B8ZZK2	Gamma-glutamylcyclotransferase OS=Homo sapiens OX=9606 GN=GGCT PE=1 SV=1	36	2	2	2	5.36	1.373	0.46	0.729738	33.03	222900	306079	39094.1	102626	322672		194195
A0A075B7B7	GAS2-like protein 2 OS=Homo sapiens OX=9606 GN=GAS2L2 PE=1 SV=1	3	3	3	3	6.83	1.237	0.31	0.818909	0	551034	681461			362096		432361
A0A2R8YEW8	GATOR complex protein DEPDC5 OS=Homo sapiens OX=9606 GN=DEPDC5 PE=1 SV=1	3	1	1	1	2.63	1.356	0.44	0.74092	83.69	413253	560554		104697	493503		316886	629126
A6NCL1	Geminin coiled-coil domain-containing protein 1 OS=Homo sapiens OX=9606 GN=GMNC PE=1 SV=2	7	1	1	1	2.01	1.404	0.49	0.725517	39.4	622973	753917		388542	302198	614917	679771	713581
Q8TCU5	Glutamate receptor ionotropic, NMDA 3A OS=Homo sapiens OX=9606 GN=GRIN3A PE=1 SV=2	5	3	3	3	6.87	1.101	0.14	0.901623	0	444693	489445	95371.9				310534
P23415	Glycine receptor subunit alpha-1 OS=Homo sapiens OX=9606 GN=GLRA1 PE=1 SV=2	6	2	2	2	3.99	1.046	0.07	0.929339	48.09	171623	179581		84391.8	105594		160046	127844
A0A0C4DGZ8	Glycoprotein Ib (Platelet), alpha polypeptide OS=Homo sapiens OX=9606 GN=GP1BA PE=1 SV=1	3	1	1	1	2.58	1.317	0.4	0.772234	50.38	703655	926369		313745	477457	1.22083e+06	387843	926369
U3KQ56	Glyoxylate reductase/hydroxypyruvate reductase OS=Homo sapiens OX=9606 GN=GRHPR PE=1 SV=1	14	3	3	3	7.18	1.304	0.38	0.779334	11.65	301253	392755	66663.9	134425		281450	249188	431034
Q92917	G-patch domain and KOW motifs-containing protein OS=Homo sapiens OX=9606 GN=GPKOW PE=1 SV=2	5	2	2	2	4.16	1.114	0.16	0.889432	37.89	183402	217995	39333.6	121017	99616.4	324127	107151	217995
A0A3B3IRS3	Guanylate-binding protein 7 (Fragment) OS=Homo sapiens OX=9606 GN=GBP7 PE=1 SV=1	6	1	2	1	5.88	1.402	0.49	0.725792	0	665152	932457	142653					932457
P00738	Haptoglobin OS=Homo sapiens OX=9606 GN=HP PE=1 SV=1	67	24	331	3	1111.3	1.035	0.05	0.933505	48.74	3.94693e+08	3.55149e+08	8.46486e+07	1.84469e+08	2.14759e+08	2.22385e+08	2.25328e+08	3.62351e+08
P00739	Haptoglobin-related protein OS=Homo sapiens OX=9606 GN=HPR PE=2 SV=2	54	15	96	5	321.63	1.248	0.32	0.810846	23.05	4.38016e+06	5.83633e+06	830061	2.01668e+06	3.18893e+06	4.12737e+06	3.84381e+06	5.83633e+06
A0A0A0MS59	Helicase SRCAP OS=Homo sapiens OX=9606 GN=SRCAP PE=1 SV=1	2	4	4	4	8.47	1.25	0.32	0.810846	13.82	34066.7	42578.9			22385.9	16343	29532.5	42578.9
P68871	Hemoglobin subunit beta OS=Homo sapiens OX=9606 GN=HBB PE=1 SV=2	37	4	18	4	61.12	1.192	0.25	0.849263	42.77	3.53824e+06	4.10603e+06	658390	1.62905e+06	2.44483e+06	2.63299e+06	2.72982e+06	4.10603e+06
P02790	Hemopexin OS=Homo sapiens OX=9606 GN=HPX PE=1 SV=2	56	16	73	16	273.16	1.042	0.06	0.930603	32.2	4.76169e+07	5.00132e+07	1.08253e+07	2.10836e+07	3.129e+07	4.14928e+07	3.04923e+07	5.00132e+07
Q5TGJ6	Hepatoma-derived growth factor-like protein 1 OS=Homo sapiens OX=9606 GN=HDGFL1 PE=2 SV=1	4	1	3	1	4.84	1.252	0.32	0.810846	2.4	138251	173159		64689.6	89391.5			173159
P14866	Heterogeneous nuclear ribonucleoprotein L OS=Homo sapiens OX=9606 GN=HNRNPL PE=1 SV=2	8	3	5	3	10.64	1.166	0.22	0.862765	8.69	423595	493853	90847.1			402801	331703	404826
A0A087X0X3	Heterogeneous nuclear ribonucleoprotein M OS=Homo sapiens OX=9606 GN=HNRNPM PE=1 SV=1	14	5	8	5	15.81	1.308	0.39	0.779334	16.08	1.6105e+06	601672	345399	806090	589667		381738
O95263	High affinity cAMP-specific and IBMX-insensitive 3',5'-cyclic phosphodiesterase 8B OS=Homo sapiens OX=9606 GN=PDE8B PE=1 SV=2	4	3	4	3	9.27	1.298	0.38	0.780615	0	535440	694872			351848			694872
P04196	Histidine-rich glycoprotein OS=Homo sapiens OX=9606 GN=HRG PE=1 SV=1	28	14	95	14	312.36	1.17	0.23	0.861608	29.04	3.75029e+07	3.86753e+07	8.04313e+06	1.82543e+07	2.15497e+07	3.35605e+07	2.4538e+07	3.74706e+07
A0A7P0TAI3	Histone-lysine N-methyltransferase 2C OS=Homo sapiens OX=9606 GN=KMT2C PE=4 SV=1	1	5	6	5	12.3	1.006	0.01	0.946809	24.67	602299	758738	154959	277305	273872	568494	505484	758738
O96028	Histone-lysine N-methyltransferase NSD2 OS=Homo sapiens OX=9606 GN=NSD2 PE=1 SV=1	3	4	4	4	9.54	1.126	0.17	0.878377	18.1	2.78651e+06	862195	597615			2.86368e+06	134334
Q8MH48	HLA class I histocompatibility antigen, alpha chain G OS=Homo sapiens OX=9606 GN=HLA-G PE=1 SV=1	10	1	1	1	3.27	1.479	0.56	0.678609	43.1	1.02803e+06	1.52041e+06	105850	473315	952394	1.2401e+06	950859	1.73506e+06
A0A140T953	HLA class I histocompatibility antigen, B alpha chain (Fragment) OS=Homo sapiens OX=9606 GN=HLA-B PE=1 SV=1	19	2	5	2	12.56	1.041	0.06	0.930767	60.99	634593	660376		292174		317032	919804	660376
P39880	Homeobox protein cut-like 1 OS=Homo sapiens OX=9606 GN=CUX1 PE=1 SV=3	3	5	5	5	9.19	1.084	0.12	0.914855	83.46	444642	1.08537e+06	54837.6	355999		932552	302211	1.08537e+06
P0CJ75	Humanin-like 8 OS=Homo sapiens OX=9606 GN=MTRNR2L8 PE=2 SV=1	88	1	8	1	19.59	1.127	0.17	0.877673	69.11	940209	1.05953e+06		330058	810307	1.5412e+06	376930
P01876	Immunoglobulin heavy constant alpha 1 OS=Homo sapiens OX=9606 GN=IGHA1 PE=1 SV=2	67	16	347	7	1362.6	1.022	0.03	0.942546	32.35	2.57641e+08	2.31861e+08	6.13648e+07	1.18621e+08	1.3618e+08	1.64046e+08	1.51148e+08	2.31861e+08
A0A0G2JMB2	Immunoglobulin heavy constant alpha 2 (Fragment) OS=Homo sapiens OX=9606 GN=IGHA2 PE=1 SV=1	62	14	203	1	787.69	1.053	0.07	0.924144	33.57	7.88684e+06	8.97565e+06	1.96122e+06	3.2515e+06	5.18261e+06	6.79823e+06	5.69471e+06	9.71049e+06
A0A286YEY4	Immunoglobulin heavy constant gamma 2 (Fragment) OS=Homo sapiens OX=9606 GN=IGHG2 PE=1 SV=1	45	13	215	6	814.64	1.051	0.07	0.926269	27.36	8.66014e+07	9.3228e+07	1.85731e+07	3.9438e+07	5.85156e+07	8.33244e+07	5.37696e+07	9.3228e+07
A0A4W9A917	Immunoglobulin heavy constant gamma 3 (Fragment) OS=Homo sapiens OX=9606 GN=IGHG3 PE=1 SV=1	35	11	126	3	402.68	1.126	0.17	0.878377	38.03	8.22633e+06	9.4626e+06	1.65493e+06	3.88239e+06	5.40569e+06	6.8445e+06	6.00366e+06	9.87373e+06
P01871	Immunoglobulin heavy constant mu OS=Homo sapiens OX=9606 GN=IGHM PE=1 SV=4	65	25	158	25	557.25	1.151	0.2	0.8714	36.1	7.24424e+07	7.73797e+07	1.0011e+07	3.35195e+07	4.76034e+07	5.60252e+07	4.90945e+07	7.92983e+07
P0DP02	Immunoglobulin heavy variable 3-30-3 OS=Homo sapiens OX=9606 GN=IGHV3-30-3 PE=3 SV=1	29	3	4	1	12.33	1.438	0.52	0.707018	35.79	932245	2.37868e+06	101279	429217	1.11375e+06	2.39703e+06	776352	2.37868e+06
P06331	Immunoglobulin heavy variable 4-34 OS=Homo sapiens OX=9606 GN=IGHV4-34 PE=1 SV=2	13	1	3	1	11.65	1.299	0.38	0.779823	20.03	362892	471243			238463	565142	258592	471243
D6RHJ6	Immunoglobulin J chain (Fragment) OS=Homo sapiens OX=9606 GN=JCHAIN PE=1 SV=1	24	4	6	1	14.88	1.051	0.07	0.926269	29.68	1.21824e+06	1.28193e+06	261272	640317	598449	1.08453e+06	643265	1.28193e+06
D6RD17	Immunoglobulin J chain (Fragment) OS=Homo sapiens OX=9606 GN=JCHAIN PE=1 SV=8	26	4	9	1	27.22	1	0	0.946809	11.53	960320	959976	182127	476515	631046	751889	609068	1.002e+06
A0A2Q2TTZ9	Immunoglobulin kappa variable 1-33 OS=Homo sapiens OX=9606 GN=IGKV1D-33 PE=1 SV=1	17	1	12	1	45.36	1.058	0.08	0.922453	31.16	3.06572e+06	3.24384e+06	657495	1.1579e+06	2.25566e+06	3.20177e+06	1.49395e+06	3.24384e+06
P0DOY2	Immunoglobulin lambda constant 2 OS=Homo sapiens OX=9606 GN=IGLC2 PE=1 SV=1	87	8	146	3	531.6	1.094	0.13	0.907915	79.88	8.21277e+07	7.27233e+07	2.08575e+07	3.68657e+07	5.39678e+07	5.644e+07	4.61402e+07	8.47114e+07
P80748	Immunoglobulin lambda variable 3-21 OS=Homo sapiens OX=9606 GN=IGLV3-21 PE=1 SV=2	14	1	8	1	30.67	1.17	0.23	0.861491	9.95	1.34104e+06	1.56892e+06	251754	661850	881227	1.27966e+06	935688	1.58543e+06
Q86YV5	Inactive tyrosine-protein kinase PRAG1 OS=Homo sapiens OX=9606 GN=PRAG1 PE=1 SV=4	2	1	2	1	6.32	1.296	0.37	0.781002	62.4	994666	1.28884e+06	139963	697987			843247	1.24983e+06
M0R3E2	INO80 complex subunit C (Fragment) OS=Homo sapiens OX=9606 GN=INO80C PE=1 SV=8	13	1	1	1	2.26	1.078	0.11	0.916526	38.78	1.56479e+06	1.74391e+06		557450	1.32891e+06	1.42239e+06	935838	1.92806e+06
P35858	Insulin-like growth factor-binding protein complex acid labile subunit OS=Homo sapiens OX=9606 GN=IGFALS PE=1 SV=1	13	4	6	4	20.69	1.407	0.49	0.723493	10.33	83532.4	1.06287e+06		39772.3	53078.7	1.0424e+06	59101.8	1.06287e+06
P16144	Integrin beta-4 OS=Homo sapiens OX=9606 GN=ITGB4 PE=1 SV=5	2	2	2	2	4.21	1.045	0.06	0.930158	32.62	546464	578696		290090	311446	472002	475661	360664
P19827	Inter-alpha-trypsin inhibitor heavy chain H1 OS=Homo sapiens OX=9606 GN=ITIH1 PE=1 SV=3	39	25	128	16	500	1.36	0.44	0.738985	53.42	4.25555e+07	8.65546e+07	6.40088e+06	1.95931e+07	5.11214e+07	7.05965e+07	4.02942e+07	9.08936e+07
B7ZKJ8	ITIH4 protein OS=Homo sapiens OX=9606 GN=ITIH4 PE=1 SV=1	29	16	60	16	229.11	1.204	0.27	0.837598	57.06	1.28663e+07	1.47363e+07	1.34749e+06	5.92378e+06	9.35968e+06	1.35884e+07	9349645	1.2751e+07
Q96PQ7	Kelch-like protein 5 OS=Homo sapiens OX=9606 GN=KLHL5 PE=1 SV=3	3	1	3	1	8.94	1.027	0.04	0.940881	34.11	790844	811978	173836	343510	519679	509884	515169	1059503
A0A1B0GVI3	Keratin, type I cytoskeletal 10 OS=Homo sapiens OX=9606 GN=KRT10 PE=1 SV=2	37	15	39	15	149.08	1.096	0.13	0.906411	65.29	5.431e+06	5.52271e+06	1.16477e+06	1.85056e+06	5.0069e+06	5.89887e+06	3.19935e+06	5.52271e+06
P35527	Keratin, type I cytoskeletal 9 OS=Homo sapiens OX=9606 GN=KRT9 PE=1 SV=3	36	9	31	9	126.7	1.441	0.53	0.706486	31.55	2.89324e+06	6.34179e+06	253099	1.33208e+06	3.07796e+06	5.54364e+06	2.64787e+06	6.34179e+06
P04259	Keratin, type II cytoskeletal 6B OS=Homo sapiens OX=9606 GN=KRT6B PE=1 SV=5	5	2	3	1	6.46	1.005	0.01	0.946809	40.36	501822	430472	107624	253299	219196	480503		314548
F8VUG2	Keratin, type II cytoskeletal 8 (Fragment) OS=Homo sapiens OX=9606 GN=KRT8 PE=1 SV=1	19	2	2	2	5.13	1	0	0.946809	12.49	616096	616386	132132	261626	864636			616386
Q15058	Kinesin-like protein KIF14 OS=Homo sapiens OX=9606 GN=KIF14 PE=1 SV=1	2	2	5	2	11.16	1.16	0.21	0.866175	0	508938	590365		234321		481519
Q9BW19	Kinesin-like protein KIFC1 OS=Homo sapiens OX=9606 GN=KIFC1 PE=1 SV=2	4	1	3	1	8.22	1.472	0.56	0.682795	73.33	801105	1.17959e+06		229058	847663	962109
P01042	Kininogen-1 OS=Homo sapiens OX=9606 GN=KNG1 PE=1 SV=2	25	11	47	11	177.15	1.071	0.1	0.920673	33.21	1.9621e+07	2.15966e+07	4.38242e+06	9.03376e+06	1.10368e+07	1.50874e+07	1.37022e+07	2.25071e+07
Q14766	Latent-transforming growth factor beta-binding protein 1 OS=Homo sapiens OX=9606 GN=LTBP1 PE=1 SV=4	2	2	2	2	4.04	1.255	0.33	0.810588	71.92	103594	130034	13915.9	76149.5		106060
P29536	Leiomodin-1 OS=Homo sapiens OX=9606 GN=LMOD1 PE=1 SV=3	4	2	4	2	10.15	1.375	0.46	0.729738	10.32	2.47799e+06	3.40682e+06	531447	1.07986e+06	2.14675e+06	3.86247e+06	2010997	3.40682e+06
A4D1F6	Leucine-rich repeat and death domain-containing protein 1 OS=Homo sapiens OX=9606 GN=LRRD1 PE=2 SV=2	3	2	6	2	9.72	1	0	0.946809	21.52	1.01606e+07	1.01589e+07	3.509e+06	4.67804e+06	5707378	8.28589e+06	7371201	9683380
H7C0H1	LIM/homeobox protein Lhx2 (Fragment) OS=Homo sapiens OX=9606 GN=LHX2 PE=1 SV=1	5	1	2	1	5.65	1.056	0.08	0.923306	70.19	3.24889e+06	2.53638e+06	349587	1.49583e+06	3.53117e+06	4628650	1.60924e+06	2.05814e+06
Q7Z4F1	Low-density lipoprotein receptor-related protein 10 OS=Homo sapiens OX=9606 GN=LRP10 PE=1 SV=2	5	2	5	2	12.23	1.428	0.51	0.712942	18.62	646493	923315	158563	201641	424824	746310	595717	923315
Q9Y2K7	Lysine-specific demethylase 2A OS=Homo sapiens OX=9606 GN=KDM2A PE=1 SV=3	3	2	2	2	4.47	1.262	0.34	0.804287	3.94	338134	426706			222195	357401	263634
F8WE62	Lysine-specific demethylase 3A OS=Homo sapiens OX=9606 GN=KDM3A PE=1 SV=1	5	3	9	3	20.94	1.346	0.43	0.746462	39.27	1.28822e+06	1.81699e+06	316246	491321	846516	1.61896e+06	668892	1.81699e+06
O00754	Lysosomal alpha-mannosidase OS=Homo sapiens OX=9606 GN=MAN2B1 PE=1 SV=3	5	2	3	2	7.82	1.184	0.24	0.855088	72.87	84760.4	106279	14149.4	39024.7	80272.9		38223.3	187487
A6NES4	Maestro heat-like repeat-containing protein family member 2A OS=Homo sapiens OX=9606 GN=MROH2A PE=4 SV=4	2	2	2	2	5.24	1.195	0.26	0.845222	20.32	608917	710068		303946	369072	755580	402714	710068
A0A286YF00	Major facilitator superfamily domain-containing protein 8 OS=Homo sapiens OX=9606 GN=MFSD8 PE=1 SV=1	7	1	1	1	2.06	1.42	0.51	0.720985	40.78	397260	564071			261048	603702		429871
E9PSC9	MAP kinase-interacting serine/threonine-protein kinase 1 OS=Homo sapiens OX=9606 GN=MKNK1 PE=4 SV=2	33	1	2	1	4.4	1.274	0.35	0.795198	30.07	3.92484e+06	4.99829e+06	512520	1.80704e+06	2.75366e+06	4.07676e+06	2.52807e+06	5119145
E7ESR8	Mastermind-like protein 3 OS=Homo sapiens OX=9606 GN=MAML3 PE=1 SV=1	7	1	7	1	15.91	1.058	0.08	0.922453	60.39	3.11329e+06	3.29264e+06	724898	1.4334e+06	2.02225e+06	2.68557e+06	3.24894e+06	1.95144e+06
Q15043	Metal cation symporter ZIP14 OS=Homo sapiens OX=9606 GN=SLC39A14 PE=1 SV=3	4	1	1	1	2.92	1.011	0.02	0.946809	21.53	655240	662765		350444	370657	639401	355504
O95243	Methyl-CpG-binding domain protein 4 OS=Homo sapiens OX=9606 GN=MBD4 PE=1 SV=1	4	1	2	1	5.99	1.12	0.16	0.883766	41.75	1.11942e+06	1.25376e+06	87554.7	640834	735596	734622	921555	1.25376e+06
C9JRZ6	MICOS complex subunit MIC19 OS=Homo sapiens OX=9606 GN=CHCHD3 PE=1 SV=2	5	1	1	1	2.86	1.16	0.21	0.866175	31.71	704700	817798	70615.4	377147	463073	524373	518862	897278
J3QL92	Microtubule cross-linking factor 1 OS=Homo sapiens OX=9606 GN=MTCL1 PE=1 SV=1	4	2	2	2	3.64	1.403	0.49	0.725517	19.06	339241	501394		145104	239954	408952	245970	523597
F8W9U4	Microtubule-associated protein OS=Homo sapiens OX=9606 GN=MAP4 PE=1 SV=1	6	3	4	3	9.65	1.025	0.04	0.941069	26.46	628814	776572	72521.9	289513	772430	633395	418713	1.19225e+06
O60307	Microtubule-associated serine/threonine-protein kinase 3 OS=Homo sapiens OX=9606 GN=MAST3 PE=1 SV=2	4	2	4	2	9.35	1.166	0.22	0.862765	8.69	423595	493853	90847.1			402801	331703	404826
Q9NU22	Midasin OS=Homo sapiens OX=9606 GN=MDN1 PE=1 SV=2	2	8	9	8	18.99	1.048	0.07	0.928286	37.06	596804	1.13887e+06	121194	973469	392172	928895	386207	2.09502e+06
Q6P087	Mitochondrial mRNA pseudouridine synthase RPUSD3 OS=Homo sapiens OX=9606 GN=RPUSD3 PE=1 SV=3	2	1	1	1	1.52	1.441	0.53	0.706486	35.76	18325.5	26414.6	4990.79	6644.29			16759.1
Q15773	Myeloid leukemia factor 2 OS=Homo sapiens OX=9606 GN=MLF2 PE=1 SV=1	13	2	2	2	4.33	1.252	0.32	0.810846	46.65	277764	347748	43705.4	174310			220633
A7E2Y1	Myosin-7B OS=Homo sapiens OX=9606 GN=MYH7B PE=1 SV=4	5	5	5	5	10.5	1.371	0.45	0.730078	49.69	4.287e+06	6.62486e+06	227486	1.97378e+06	3.82862e+06	7.15597e+06	4.20322e+06	5.97187e+06
Q96PD5	N-acetylmuramoyl-L-alanine amidase OS=Homo sapiens OX=9606 GN=PGLYRP2 PE=1 SV=1	19	5	11	5	40.29	1.059	0.08	0.922193	22.66	985058	1.13467e+06	198988	548557	647302	830796	782377	1.13467e+06
O43674	NADH dehydrogenase [ubiquinone] 1 beta subcomplex subunit 5, mitochondrial OS=Homo sapiens OX=9606 GN=NDUFB5 PE=1 SV=1	13	2	2	2	4.05	1.329	0.41	0.761329	0	50278.8	66814.4		23148.9			42391.2
Q7Z494	Nephrocystin-3 OS=Homo sapiens OX=9606 GN=NPHP3 PE=1 SV=1	5	3	6	3	11.7	1.197	0.26	0.844016	39.95	2.94547e+06	3.74469e+06	631706	1.18751e+06	3.60965e+06	3.918e+06	1.95886e+06	3.74469e+06
A0A087X2B3	Neuronal cell adhesion molecule OS=Homo sapiens OX=9606 GN=NRCAM PE=1 SV=1	3	1	2	1	5.59	1.112	0.15	0.89175	40.12	1.94529e+06	2162233	167034	895635	1.75255e+06	1.3885e+06	1.73333e+06	2162233
Q6W5P4	Neuropeptide S receptor OS=Homo sapiens OX=9606 GN=NPSR1 PE=1 SV=1	2	1	1	1	1.5	1.236	0.31	0.819488	0	96851.4	119690	20771.4					119690
Q8TET4	Neutral alpha-glucosidase C OS=Homo sapiens OX=9606 GN=GANC PE=2 SV=3	1	1	1	1	1.7	1.015	0.02	0.946766	6.64	535842	543623	114920	236134	874422		344908
Q9UMS0	NFU1 iron-sulfur cluster scaffold homolog, mitochondrial OS=Homo sapiens OX=9606 GN=NFU1 PE=1 SV=2	7	1	1	1	2.27	1.104	0.14	0.899409	18.09	164445	181504	30976.6		123030		122816	170186
P0CG21	NHL-repeat-containing protein 4 OS=Homo sapiens OX=9606 GN=NHLRC4 PE=1 SV=1	28	2	3	2	8.56	1.353	0.44	0.74327	38	698600	709405	89513	321644	465647	578612	608246	630502
A0A7I2V4D7	Nodal modulator 3 OS=Homo sapiens OX=9606 GN=NOMO3 PE=1 SV=1	6	2	2	2	4.81	1.443	0.53	0.705794	11.74	140268	202376	27794.9	69897.2			128400
P52298	Nuclear cap-binding protein subunit 2 OS=Homo sapiens OX=9606 GN=NCBP2 PE=1 SV=1	15	1	1	1	3.18	1.037	0.05	0.933028	4.99	798284	827476	164469	380349	524568			827476
E7EWM1	Nuclear receptor coactivator 2 OS=Homo sapiens OX=9606 GN=NCOA2 PE=1 SV=2	1	1	1	1	1.81	1.403	0.49	0.725517	19.06	339241	501394		145104	239954	408952	245970	523597
Q8NGC5	Olfactory receptor 6J1 OS=Homo sapiens OX=9606 GN=OR6J1 PE=3 SV=1	12	1	2	1	7.04	1.304	0.38	0.779334	9.2	407887	532026	87478.3			461694		500040
A0A5F9ZH16	Outer dynein arm-docking complex subunit 2 (Fragment) OS=Homo sapiens OX=9606 GN=ODAD2 PE=1 SV=1	31	2	2	2	3.85	1.304	0.38	0.779334	11.65	301253	392755	66663.9	134425		281450	249188	431034
Q02548	Paired box protein Pax-5 OS=Homo sapiens OX=9606 GN=PAX5 PE=1 SV=1	6	1	3	1	6.7	1.189	0.25	0.849618	0	66654.1	79242.4	14295.1			64632.4
Q9Y5B6	PAX3- and PAX7-binding protein 1 OS=Homo sapiens OX=9606 GN=PAXBP1 PE=1 SV=2	5	2	2	2	5.25	1.156	0.21	0.867986	37.1	78629.5	213071		62232	30057.2	128757		287587
A0A6Q8PHM6	Periaxin (Fragment) OS=Homo sapiens OX=9606 GN=PRX PE=4 SV=1	36	1	11	1	27.83	1.339	0.42	0.753933	24.87	5.60097e+06	7.50016e+06	787102	2.57875e+06	4.10468e+06	6.11736e+06	3.64117e+06	7.56085e+06
K7EIX1	Perilipin-5 OS=Homo sapiens OX=9606 GN=PLIN5 PE=1 SV=1	38	1	1	1	2.09	1.392	0.48	0.729182	24.77	70428.1	98014.8		32425.9			52658.1	115751
Q9P0Z9	Peroxisomal sarcosine oxidase OS=Homo sapiens OX=9606 GN=PIPOX PE=1 SV=2	10	1	1	1	3	1.465	0.55	0.68923	56.21	60857	88758.6	8688.1		60076.1	65906.3	56314	98348.3
O43933	Peroxisome biogenesis factor 1 OS=Homo sapiens OX=9606 GN=PEX1 PE=1 SV=1	1	1	1	1	2.3	1.209	0.27	0.836562	7.8	1.23672e+06	1.50678e+06	345501	560370	812674	1.20021e+06	955996	1573857
A0A087X169	PHD finger protein 19 OS=Homo sapiens OX=9606 GN=PHF19 PE=1 SV=1	8	2	2	2	5.49	1.297	0.38	0.781002	2.98	967570	1.25499e+06		443534	638600	1.02361e+06	889691	1.22979e+06
E6ZCI6	Phosphatidylcholine:ceramide cholinephosphotransferase 1 OS=Homo sapiens OX=9606 GN=SGMS1 PE=1 SV=1	18	1	1	1	3.52	1.374	0.46	0.729738	52.12	65283	119679	8914.24	47208.8		51473.5	75932	127582
E9PPK2	Phosphofurin acidic cluster sorting protein 1 (Fragment) OS=Homo sapiens OX=9606 GN=PACS1 PE=1 SV=1	13	1	1	1	2.52	1.471	0.56	0.684179	21.55	810841	1.19251e+06	150453	431495				1.19251e+06
B9DI82	Phosphoinositide phospholipase C (Fragment) OS=Homo sapiens OX=9606 GN=PLCH2 PE=1 SV=2	3	2	3	2	8.15	1.223	0.29	0.826779	56.37	563756	689307		385221	249611	599177	410364
Q8WYW5	Phospholipase D1 OS=Homo sapiens OX=9606 GN=PLD1 PE=2 SV=1	13	1	11	1	26.21	1.397	0.48	0.727206	0	470579	657559	100924					657559
P36955	Pigment epithelium-derived factor OS=Homo sapiens OX=9606 GN=SERPINF1 PE=1 SV=4	21	6	12	6	42.19	1.408	0.49	0.723493	35.82	1.84581e+06	4.92233e+06	179189	849832	2.85937e+06	4.02847e+06	2.37094e+06	4.92233e+06
P03952	Plasma kallikrein OS=Homo sapiens OX=9606 GN=KLKB1 PE=1 SV=1	10	4	8	4	22.5	1.062	0.09	0.922193	21.89	1.42724e+06	1.51911e+06	306095	688121	797720	981820	963815	1.71011e+06
A0A0A0MSI4	Pleckstrin homology domain-containing family B member 2 OS=Homo sapiens OX=9606 GN=PLEKHB2 PE=1 SV=1	11	1	1	1	2.51	1.226	0.29	0.8248	37.96	1.81566e+06	2.22673e+06	389399	1.1237e+06	812824		1412776
Q86UU1	Pleckstrin homology-like domain family B member 1 OS=Homo sapiens OX=9606 GN=PHLDB1 PE=1 SV=1	4	3	3	3	6.41	1.084	0.12	0.914855	83.46	444642	476327	54837.6	355999		380316	302211	498348
O15031	Plexin-B2 OS=Homo sapiens OX=9606 GN=PLXNB2 PE=1 SV=3	2	1	1	1	3.44	1.026	0.04	0.941069	91.51	143618	147287	19445.9	66123.4	98569.9	42546.5	157848	147287
Q9ULL4	Plexin-B3 OS=Homo sapiens OX=9606 GN=PLXNB3 PE=1 SV=2	2	2	2	2	5.17	1.059	0.08	0.922193	43.28	1.70131e+06	2.08174e+06	197745	910870	1.11797e+06	564081	1.32965e+06	2.08174e+06
E7ETH1	Potassium voltage-gated channel subfamily C member 3 OS=Homo sapiens OX=9606 GN=KCNC3 PE=1 SV=1	4	1	1	1	2.52	1.266	0.34	0.802824	0	406983	515066			267437	420103
E9PKN0	Pre-mRNA cleavage complex 2 protein Pcf11 (Fragment) OS=Homo sapiens OX=9606 GN=PCF11 PE=1 SV=1	2	1	3	1	6.89	1.304	0.38	0.779334	11.65	301253	392755	66663.9	134425		281450	249188	431034
C9J0J7	Profilin OS=Homo sapiens OX=9606 GN=PFN2 PE=1 SV=1	12	1	4	1	10.04	1.129	0.18	0.875531	20.66	4.02204e+06	4.54144e+06		1.98695e+06	2.46318e+06		2.48256e+06	5.27101e+06
E7EW31	Proline-rich basic protein 1 OS=Homo sapiens OX=9606 GN=PROB1 PE=2 SV=2	2	1	1	1	2.76	1.326	0.41	0.764375	89.91	369079	489449	79155.2			708966	174859
Q9H6Z9	Prolyl hydroxylase EGLN3 OS=Homo sapiens OX=9606 GN=EGLN3 PE=1 SV=1	5	1	1	1	1.67	1.134	0.18	0.875485	6.12	45740.1	51856.9		21339.9	29661.5	42296.1	31541	71442.6
P27918	Properdin OS=Homo sapiens OX=9606 GN=CFP PE=1 SV=2	13	3	9	3	31.12	1.2	0.26	0.841713	31.13	515230	540121	26069.3	237641	338568	369213	394150	540121
J3QL48	Proteasome endopeptidase complex (Fragment) OS=Homo sapiens OX=9606 PE=4 SV=1	17	1	2	1	5.81	1.195	0.26	0.845229	17.53	1.4017e+06	1.77785e+06	251707	754970	921083	1.45007e+06	889884	1.87316e+06
Q06455	Protein CBFA2T1 OS=Homo sapiens OX=9606 GN=RUNX1T1 PE=1 SV=2	7	1	1	1	3.28	1.487	0.57	0.675096	43.35	597297	888403		277552	388890	541675	754015
Q5T1J6	Protein FAM182A OS=Homo sapiens OX=9606 GN=FAM182A PE=2 SV=1	14	1	1	1	2.94	1.015	0.02	0.946766	0	154397	156695			101457		99416.9
Q99581	Protein FEV OS=Homo sapiens OX=9606 GN=FEV PE=1 SV=1	6	1	1	1	2.01	1.432	0.52	0.70855	0	147681	211547	31672.7				134219
Q9HCD6	Protein TANC2 OS=Homo sapiens OX=9606 GN=TANC2 PE=1 SV=3	1	1	1	1	3.02	1.018	0.03	0.94328	50.19	92149.5	93808.1		42983.5	59768.8	22838.8	79661	93808.1
Q6AWC2	Protein WWC2 OS=Homo sapiens OX=9606 GN=WWC2 PE=1 SV=2	1	1	1	1	2.02	1.396	0.48	0.727206	80.9	270022	377021	53770.3	133895		734221	239206	170815
P00734	Prothrombin OS=Homo sapiens OX=9606 GN=F2 PE=1 SV=2	48	23	135	23	524.04	1.365	0.45	0.73371	45.81	5.60904e+07	7.13326e+07	1.20295e+07	2.72559e+07	3.62446e+07	5.65291e+07	4.52578e+07	7.33305e+07
Q9H0K6	Pseudouridylate synthase 7 homolog-like protein OS=Homo sapiens OX=9606 GN=PUS7L PE=1 SV=1	3	2	7	2	14.15	1.103	0.14	0.899409	12.93	1.15262e+07	12713420	2.47199e+06	5.08587e+06	8.01029e+06	6924663	8.82146e+06	12713420
A0A0D9SGD3	Putative deoxyribonuclease TATDN1 OS=Homo sapiens OX=9606 GN=TATDN1 PE=1 SV=1	12	1	1	1	2.53	1.069	0.1	0.920673	40.82	213920	228619			140571		190378	174187
Q58FF7	Putative heat shock protein HSP 90-beta-3 OS=Homo sapiens OX=9606 GN=HSP90AB3P PE=5 SV=1	2	1	1	1	1.82	1.356	0.44	0.74092	13.29	1.0565e+06	1.43262e+06		444764	759278	1.16849e+06
Q96TA0	Putative protocadherin beta-18 OS=Homo sapiens OX=9606 GN=PCDHB18P PE=5 SV=2	2	1	2	1	4.51	1.053	0.07	0.924144	0	25419.5	26759.6			16703.7			26759.6
A6NLC8	Putative TAF11-like protein ENSP00000332601 OS=Homo sapiens OX=9606 PE=3 SV=2	15	1	1	1	3.02	1.104	0.14	0.899409	16.35	297555	357943	58052.7	136998	243507	297476	189595	357943
A0A0J9YWL9	Putative testis-expressed protein 13C OS=Homo sapiens OX=9606 GN=TEX13C PE=5 SV=1	15	6	7	6	14.2	1.209	0.27	0.836457	11.04	907075	148671	132124	631713	596057		101612	138010
Q6ZST2	Putative uncharacterized protein COL25A1-DT OS=Homo sapiens OX=9606 GN=COL25A1-DT PE=5 SV=1	18	1	1	1	2.59	1.027	0.04	0.94028	34.11	269450	276803		124058		173825	175621	346034
A0A7I2V3P9	Ras GTPase-activating protein-binding protein 2 OS=Homo sapiens OX=9606 GN=G3BP2 PE=1 SV=1	5	1	3	1	8.25	1.369	0.45	0.730078	27	385134	488894	67953.5	215536		534286	269200	488894
C9IYA5	Ras guanyl-releasing protein 3 (Fragment) OS=Homo sapiens OX=9606 GN=RASGRP3 PE=1 SV=1	8	1	1	1	1.54	1.369	0.45	0.730078	0.17	50523.7	69163.9			33200.1	43521.1	43932.3	69163.9
H0YNK6	Receptor protein-tyrosine kinase OS=Homo sapiens OX=9606 GN=TYRO3 PE=1 SV=1	2	1	1	1	2.14	1.387	0.47	0.729182	22.19	866419	1.18219e+06	185818	385844	658564	948178	750054	1604073
C9JUD5	Regulator of microtubule dynamics protein 2 (Fragment) OS=Homo sapiens OX=9606 GN=RMDN2 PE=1 SV=1	7	1	1	1	2.01	1.042	0.06	0.930603	14.99	271524	295140		119137	187224	240725	189307	239667
F5H5S0	Replication factor C subunit 5 (Fragment) OS=Homo sapiens OX=9606 GN=RFC5 PE=1 SV=1	26	1	1	1	2.58	1.275	0.35	0.795198	4.27	12167.3	15516		5601.98		12296		15969.3
P78363	Retinal-specific phospholipid-transporting ATPase ABCA4 OS=Homo sapiens OX=9606 GN=ABCA4 PE=1 SV=3	1	1	1	1	3.28	1.12	0.16	0.883766	41.75	1.11942e+06	1.25376e+06	87554.7	640834	735596	734622	921555	1.25376e+06
A0A0G2JKR7	Retinoic acid receptor RXR-beta OS=Homo sapiens OX=9606 GN=RXRB PE=1 SV=1	16	3	4	3	8.41	1.296	0.37	0.781002	11.78	2.30777e+06	2.99017e+06	469573	1.10827e+06	1.51649e+06	2.8639e+06	1.74639e+06	2.99017e+06
Q6ICC9	Retrotransposon Gag-like protein 6 OS=Homo sapiens OX=9606 GN=RTL6 PE=2 SV=1	8	1	1	1	2.56	1.117	0.16	0.886116	37.55	449078	501625		265653	229679		318262
Q8N5U6	RING finger protein 10 OS=Homo sapiens OX=9606 GN=RNF10 PE=1 SV=2	1	1	1	1	2.11	1.225	0.29	0.8248	33.62	497917	607176		201267	372678	749900	299809	607176
Q5THR1	RNA helicase OS=Homo sapiens OX=9606 GN=DHX35 PE=1 SV=1	3	1	2	1	5.68	1.093	0.13	0.909671	62.41	1.47496e+06	1.61163e+06	546276	679088	489675	1.31449e+06	1.03221e+06	1.35525e+06
Q9NYV6	RNA polymerase I-specific transcription initiation factor RRN3 OS=Homo sapiens OX=9606 GN=RRN3 PE=1 SV=1	5	2	2	2	4.72	1.038	0.05	0.932489	16.71	668418	691073	149497	225303	439231	501928	438459	723259
Q9NXZ1	Sarcoma antigen 1 OS=Homo sapiens OX=9606 GN=SAGE1 PE=1 SV=2	5	2	2	2	4.96	1.053	0.07	0.924144	0	25419.5	26759.6			16703.7			26759.6
H0YKC2	Secretogranin III (Fragment) OS=Homo sapiens OX=9606 GN=SCG3 PE=1 SV=1	18	1	1	1	1.87	1.289	0.37	0.783583	17.42	31079.3	40074		12661.5	23080.7		26547.1	38380.9
Q16629	Serine/arginine-rich splicing factor 7 OS=Homo sapiens OX=9606 GN=SRSF7 PE=1 SV=1	8	1	2	1	4.33	1.079	0.11	0.916526	30.08	2.06707e+06	2.33278e+06	364674	951703	1.80029e+06	1.92242e+06	1.16433e+06	2.33278e+06
Q7L7X3	Serine/threonine-protein kinase TAO1 OS=Homo sapiens OX=9606 GN=TAOK1 PE=1 SV=1	2	2	4	2	7.71	1.171	0.23	0.860071	78.09	1.63753e+06	1.39915e+06	102236	753936	1.1065e+06	740396	1.25135e+06	1.39915e+06
O75385	Serine/threonine-protein kinase ULK1 OS=Homo sapiens OX=9606 GN=ULK1 PE=1 SV=2	1	1	1	1	1.54	1.157	0.21	0.867986	178.03	855502	989821	190586	379190			1.78734e+06	347785
P02787	Serotransferrin OS=Homo sapiens OX=9606 GN=TF PE=1 SV=3	82	64	834	64	3031	1.021	0.03	0.942546	43.25	6.28726e+08	5.90776e+08	1.50596e+08	2.89473e+08	3.46886e+08	4.2293e+08	3.74825e+08	6.02393e+08
P02743	Serum amyloid P-component OS=Homo sapiens OX=9606 GN=APCS PE=1 SV=2	12	2	8	2	24.65	1.029	0.04	0.939496	31.48	1.06222e+06	1.52815e+06	199958	489060	1.28493e+06	1.2464e+06	779868	2.06291e+06
A0A590UJF3	SH3 and multiple ankyrin repeat domains protein 2 (Fragment) OS=Homo sapiens OX=9606 GN=SHANK2 PE=1 SV=1	6	2	2	2	4.26	1.247	0.32	0.810846	79.97	1.24844e+06	1.00183e+06	447095		491291	1.28241e+06	635622	654842
Q9BYB0	SH3 and multiple ankyrin repeat domains protein 3 OS=Homo sapiens OX=9606 GN=SHANK3 PE=1 SV=3	3	3	4	3	9.08	1.09	0.12	0.911297	27.24	611934	544726	157546	234697		985448		245592
Q5T5P2	Sickle tail protein homolog OS=Homo sapiens OX=9606 GN=KIAA1217 PE=1 SV=2	3	4	4	4	7.42	1.162	0.22	0.865697	27.52	614795	667603		232360	492142	727374	363114	667603
D6RFI0	Sideroflexin-1 (Fragment) OS=Homo sapiens OX=9606 GN=SFXN1 PE=1 SV=8	13	1	1	1	3.88	1.386	0.47	0.729182	30.21	1.10596e+06	1.69689e+06	304959	509196	462178	794834	1.07661e+06	1.84458e+06
A0A087WVW8	Sodium-coupled neutral amino acid transporter 3 (Fragment) OS=Homo sapiens OX=9606 GN=SLC38A3 PE=1 SV=1	51	2	2	2	5.42	1.033	0.05	0.934483	17.52	412403	425845	79101.7	189875	408146		270182
D6R9R0	Solute carrier family 49 member A3 OS=Homo sapiens OX=9606 GN=SLC49A3 PE=1 SV=1	6	2	2	2	5.22	1.45	0.54	0.699724	28.73	184927	216234	30200.3	85142.5	139447	176367	134151	307765
Q96RF0	Sorting nexin-18 OS=Homo sapiens OX=9606 GN=SNX18 PE=1 SV=2	4	1	1	1	2.6	1.481	0.57	0.6779	0	33312	49328.2			21890	40233.6
A0A494C0S0	Sorting nexin-25 OS=Homo sapiens OX=9606 GN=SNX25 PE=1 SV=1	1	1	1	1	1.6	1.144	0.19	0.8714	48.45	66288.5	75802.4		44809.2	29668.9	51341.1		91283.9
Q6Q759	Sperm-associated antigen 17 OS=Homo sapiens OX=9606 GN=SPAG17 PE=2 SV=1	2	2	2	2	4.69	1.016	0.02	0.945645	26.22	1.21358e+06	1.23321e+06	358340	558748	677627	978855	937110	1.23321e+06
Q7Z572	Spermatogenesis-associated protein 21 OS=Homo sapiens OX=9606 GN=SPATA21 PE=2 SV=3	3	1	1	1	2.1	1.087	0.12	0.914855	30.78	302377	328665			198698	323715	208526	249531
A0A2R8YFQ0	Spermidine/spermine N(1)-acetyltransferase-like protein 1 OS=Homo sapiens OX=9606 GN=SATL1 PE=4 SV=1	5	2	2	2	4.49	1.146	0.2	0.8714	22.05	299680	503656	50601.6	175250		355765	368980
Q96DF8	Splicing factor ESS-2 homolog OS=Homo sapiens OX=9606 GN=ESS2 PE=1 SV=1	5	1	3	1	7.9	1.317	0.4	0.772234	50.38	703655	926369		313745	477457	1.22083e+06	387843	926369
Q9UH36	SRR1-like protein OS=Homo sapiens OX=9606 GN=SRRD PE=2 SV=1	5	1	5	1	11.32	1.009	0.01	0.946809	28.84	1.49337e+06	1.5069e+06	142219	687566	1.21119e+06	1.31935e+06	770060	1.5069e+06
Q99536	Synaptic vesicle membrane protein VAT-1 homolog OS=Homo sapiens OX=9606 GN=VAT1 PE=1 SV=2	6	1	1	1	2.67	1.28	0.36	0.793467	8.54	780147	987825	142292	359189	538217	854940	552845	987825
Q9H987	Synaptopodin 2-like protein OS=Homo sapiens OX=9606 GN=SYNPO2L PE=1 SV=3	7	3	9	3	23.38	1.176	0.23	0.857825	116.29	1.42784e+06	620119	327917	657394	327007	327565		957515
Q92609	TBC1 domain family member 5 OS=Homo sapiens OX=9606 GN=TBC1D5 PE=1 SV=1	8	3	7	3	15.56	1.103	0.14	0.899409	12.93	1.15262e+07	12713420	2.47199e+06	5.08587e+06	8.01029e+06	6924663	8769542	12713420
Q9P273	Teneurin-3 OS=Homo sapiens OX=9606 GN=TENM3 PE=2 SV=3	2	3	3	3	6.54	1.21	0.28	0.836331	46.96	3.35478e+06	4.78348e+06	665551	1.54458e+06	2.35008e+06	2.40634e+06	3.03494e+06	5.49614e+06
Q75WM6	Testis-specific H1 histone OS=Homo sapiens OX=9606 GN=H1-7 PE=1 SV=3	6	1	1	1	2.46	1.253	0.32	0.810846	28.61	142761	178824	30617.6			120403		216625
Q8NDW8	Tetratricopeptide repeat protein 21A OS=Homo sapiens OX=9606 GN=TTC21A PE=1 SV=3	2	2	2	2	4.26	1.023	0.03	0.942546	0	233568	239044		107537				239044
H7BZ54	Tetratricopeptide repeat protein 31 (Fragment) OS=Homo sapiens OX=9606 GN=TTC31 PE=1 SV=1	9	1	1	1	2.22	1.076	0.11	0.91796	27.21	1.07494e+06	1.15686e+06	223151	536605	706367	745728	733981	1.40674e+06
A0A1C7CYW7	Tetratricopeptide repeat protein 34 OS=Homo sapiens OX=9606 GN=TTC34 PE=1 SV=1	5	2	2	2	5.77	1.467	0.55	0.687789	55.92	524434	769279		217263	382990	943354	324632
Q9BQ50	Three prime repair exonuclease 2 OS=Homo sapiens OX=9606 GN=TREX2 PE=1 SV=2	15	2	3	2	6.36	1.38	0.46	0.729182	28.25	2.5735e+06	3.55221e+06	301292	1.18487e+06	2.08913e+06	3.04732e+06	1.97992e+06	3.55221e+06
Q9UPZ6	Thrombospondin type-1 domain-containing protein 7A OS=Homo sapiens OX=9606 GN=THSD7A PE=1 SV=4	2	3	3	3	6.21	1.159	0.21	0.866175	2.38	222583	258072	47736.7			210492	187291	253934
Q5W0C6	Torsin-3A (Fragment) OS=Homo sapiens OX=9606 GN=TOR3A PE=1 SV=1	21	2	7	2	19.69	1.36	0.44	0.739371	126.95	1.12654e+06	1.57384e+06		1.56588e+06	245203	795957	1.5252e+06	1.57384e+06
Q04206	Transcription factor p65 OS=Homo sapiens OX=9606 GN=RELA PE=1 SV=2	13	2	2	2	5.53	1.255	0.33	0.810588	58.1	392686	492839	85040.7	162524	258042	244443	312688	742814
Q15361	Transcription termination factor 1 OS=Homo sapiens OX=9606 GN=TTF1 PE=1 SV=3	2	2	5	2	8.1	1	0	0.946809	21.52	1.01606e+07	1.01589e+07	3.509e+06	4.67804e+06	5707378	8.28589e+06	7371201	9683380
Q5T5J6	Transcriptional protein SWT1 OS=Homo sapiens OX=9606 GN=SWT1 PE=2 SV=1	3	1	6	1	11.54	1.416	0.5	0.723082	110.89	3.33685e+06	4.81562e+06	324607		4834160	3927764	2.55999e+06	5.52922e+06
Q86YP4	Transcriptional repressor p66-alpha OS=Homo sapiens OX=9606 GN=GATAD2A PE=1 SV=1	5	2	2	2	4.62	1.13	0.18	0.875531	45.3	1.20673e+06	1.36337e+06	276478		742275	1.65154e+06	599374	1.36337e+06
Q9BX84	Transient receptor potential cation channel subfamily M member 6 OS=Homo sapiens OX=9606 GN=TRPM6 PE=1 SV=2	4	3	6	3	14.58	1.036	0.05	0.933028	21.08	3.93798e+06	4.07877e+06	1.11238e+06	1.81309e+06	2.26554e+06	3.57316e+06	2.543e+06	4.07877e+06
Q8TDI8	Transmembrane channel-like protein 1 OS=Homo sapiens OX=9606 GN=TMC1 PE=2 SV=2	2	1	2	1	4.39	1.167	0.22	0.862765	22.32	393979	483055	75355.5	181392	318355	461033	247738	483055
C9J1P0	Transmembrane protein 169 (Fragment) OS=Homo sapiens OX=9606 GN=TMEM169 PE=1 SV=1	34	1	1	1	3.03	1.07	0.1	0.920673	29.71	758009	811213		274650	632937		400049	1.04367e+06
A0A087WT59	Transthyretin OS=Homo sapiens OX=9606 GN=TTR PE=1 SV=2	89	9	68	9	312.41	1.043	0.06	0.930603	34.81	4.32031e+07	3.84572e+07	8.0453e+06	2.23582e+07	2.83896e+07	3.92156e+07	2.2207e+07	3.84572e+07
E7ETY2	Treacle protein OS=Homo sapiens OX=9606 GN=TCOF1 PE=1 SV=1	3	2	4	2	11.7	1.129	0.18	0.875531	7.85	368074	415691		171262	239332	339050	249767	487479
Q7Z4K8	Tripartite motif-containing protein 46 OS=Homo sapiens OX=9606 GN=TRIM46 PE=2 SV=2	4	1	2	1	5.7	1.175	0.23	0.857825	59.5	802199	942464	116336	546207		768702
F8WDR2	tRNA (adenine(58)-N(1))-methyltransferase OS=Homo sapiens OX=9606 GN=TRMT61B PE=1 SV=1	9	2	2	2	4.58	1.435	0.52	0.707503	16.52	43961.4	63068.9		18110.3	32285.6		40014.8
A0A0A0MRJ4	Troponin T, cardiac muscle OS=Homo sapiens OX=9606 GN=TNNT2 PE=1 SV=1	7	1	2	1	5.28	1.02	0.03	0.942546	3.64	1.574e+06	1605411			1.03431e+06	587662	1.04355e+06	1605411
H0Y5E3	Tubulin monoglycylase TTLL3 (Fragment) OS=Homo sapiens OX=9606 GN=TTLL3 PE=4 SV=1	5	2	2	2	4.94	1.274	0.35	0.795198	30.07	3.92484e+06	4.99829e+06	512520	1.80704e+06	2.75366e+06	4.07676e+06	2.52807e+06	5119145
Q5T466	Tubulointerstitial nephritis antigen OS=Homo sapiens OX=9606 GN=TINAG PE=1 SV=1	12	1	2	1	6.03	1.008	0.01	0.946809	15.72	1.96354e+06	1.9796e+06	389675	904034	1.76076e+06	1.96967e+06	1.25598e+06	1.90891e+06
Q15696	U2 small nuclear ribonucleoprotein auxiliary factor 35 kDa subunit-related protein 2 OS=Homo sapiens OX=9606 GN=ZRSR2 PE=1 SV=2	6	2	3	2	6.21	1.308	0.39	0.779334	16.08	460168	601672	89036.8	443869	302386		381738
Q9Y4E8	Ubiquitin carboxyl-terminal hydrolase 15 OS=Homo sapiens OX=9606 GN=USP15 PE=1 SV=3	4	2	2	2	5.21	1.124	0.17	0.879754	12.91	695805	746491		345848	423527	573928	566971	746491
Q5LJB1	Ubiquitin carboxyl-terminal hydrolase isozyme L5 (Fragment) OS=Homo sapiens OX=9606 GN=UCHL5 PE=4 SV=1	7	1	1	1	1.66	1.388	0.47	0.729182	46.43	1.06041e+06	1.4719e+06		344327	988030	1.84661e+06	607124
A0A0A0MSL3	Ubiquitin-conjugating enzyme E2 variant 1 OS=Homo sapiens OX=9606 GN=UBE2V1 PE=4 SV=1	18	1	1	1	2.5	1.02	0.03	0.942546	3.64	1.574e+06	1605411			1.03431e+06	587662	1.04355e+06	1605411
M0QYU9	Uncharacterized protein (Fragment) OS=Homo sapiens OX=9606 PE=1 SV=1	45	1	1	1	2.54	1.335	0.42	0.757104	7.17	52941.2	70695.2	11916.6	23224.2			44853.4
A0A1B0GV14	Uncharacterized protein C1orf112 OS=Homo sapiens OX=9606 GN=C1orf112 PE=1 SV=1	24	2	2	2	4.86	1.183	0.24	0.855088	46.76	764271	904193			502218	737487	838672	619016
E9PNW5	Uncharacterized protein C4orf50 OS=Homo sapiens OX=9606 GN=C4orf50 PE=4 SV=2	4	3	6	3	14.46	1.076	0.11	0.91796	27.21	1.07494e+06	1.15686e+06	223151	536605	706367	745728	733981	1.40674e+06
F5H6E2	Unconventional myosin-Ic OS=Homo sapiens OX=9606 GN=MYO1C PE=1 SV=1	4	2	2	2	4.88	1.174	0.23	0.857825	0	503485	591156	107981				375066
A0A140TA25	Unconventional myosin-Ih OS=Homo sapiens OX=9606 GN=MYO1H PE=1 SV=1	2	2	2	2	5.6	1.091	0.13	0.910785	31.6	1.53603e+06	1.68168e+06	430077	676118	1.00935e+06	1.15421e+06	1066964	2.41475e+06
Q16831	Uridine phosphorylase 1 OS=Homo sapiens OX=9606 GN=UPP1 PE=1 SV=1	4	1	2	1	4.27	1.272	0.35	0.796534	0.45	412244	524506		189802		204681	332779	526113
P07225	Vitamin K-dependent protein S OS=Homo sapiens OX=9606 GN=PROS1 PE=1 SV=1	51	22	129	22	458.06	1.379	0.46	0.729182	47.44	3.69792e+07	4.83422e+07	2.98146e+06	1.93794e+07	2.42998e+07	4.14054e+07	3.06713e+07	4.72919e+07
P04004	Vitronectin OS=Homo sapiens OX=9606 GN=VTN PE=1 SV=1	33	12	103	12	340.79	1.27	0.35	0.798543	38.16	5.30703e+07	6.59688e+07	1.0618e+07	2.56708e+07	3.48736e+07	4.93522e+07	4.61872e+07	6.59688e+07
Q9Y330	Zinc finger and BTB domain-containing protein 12 OS=Homo sapiens OX=9606 GN=ZBTB12 PE=1 SV=1	3	1	1	1	2.27	1.369	0.45	0.730078	3.54	40478.9	55406.9			26599.5	41675.3	35153.6	56728.1
A0A7P0T820	Zinc finger and BTB domain-containing protein 47 OS=Homo sapiens OX=9606 GN=ZBTB47 PE=4 SV=1	3	1	4	1	9.1	1.066	0.09	0.920673	22.5	473708	505016			311283	474421	239507	505016
Q96IU2	Zinc finger BED domain-containing protein 3 OS=Homo sapiens OX=9606 GN=ZBED3 PE=1 SV=1	15	2	3	2	7.61	1.28	0.36	0.793467	8.54	780147	987825	142292	359189	538217	854940	552845	987825
Q5T200	Zinc finger CCCH domain-containing protein 13 OS=Homo sapiens OX=9606 GN=ZC3H13 PE=1 SV=1	3	3	5	3	12.13	1.403	0.49	0.725517	32.3	1.90499e+06	2.57904e+06	212220	897226	1.25181e+06	2.10354e+06	1.49977e+06	3.04563e+06
G3V5N8	Zinc finger FYVE domain-containing protein 1 OS=Homo sapiens OX=9606 GN=ZFYVE1 PE=1 SV=1	5	2	4	2	9.67	1.242	0.31	0.81405	40	1.08543e+06	1.34778e+06	318811	499746	538411	1.22009e+06	855116	1.33842e+06
A0A0A0MP75	Zinc finger protein 180 OS=Homo sapiens OX=9606 GN=ZNF180 PE=1 SV=1	1	1	1	1	1.57	1.011	0.02	0.946809	42.15	3.40472e+06	3.6467e+06	587088	2.32011e+06	2.23731e+06	2.97436e+06	3153436	2.76784e+06
Q9H9D4	Zinc finger protein 408 OS=Homo sapiens OX=9606 GN=ZNF408 PE=1 SV=1	6	2	2	2	4.89	1.458	0.54	0.693525	24.31	404256	589269	66630.1	227397	265645		402401	547487
Q8N8Z8	Zinc finger protein 441 OS=Homo sapiens OX=9606 GN=ZNF441 PE=1 SV=2	2	1	2	1	3.19	1.209	0.27	0.836457	11.04	122936	148671			80783.8		101612	138010
Q8NB42	Zinc finger protein 527 OS=Homo sapiens OX=9606 GN=ZNF527 PE=2 SV=2	4	1	1	1	2.69	1.059	0.08	0.922193	0	40344.1	42717.2		18574.9		34841.5
P25311	Zinc-alpha-2-glycoprotein OS=Homo sapiens OX=9606 GN=AZGP1 PE=1 SV=2	23	4	14	4	58.66	1.029	0.04	0.939496	29.54	2.02432e+06	2.01658e+06	434151	978434	1.32349e+06	1.95272e+06	1.27945e+06	1.85414e+06
Q86SH2	Zygote arrest protein 1 OS=Homo sapiens OX=9606 GN=ZAR1 PE=1 SV=1	8	2	2	2	4.53	1.239	0.31	0.816818	72.51	260395	322525	55846.2			421490	127714
